# Supplementary material for: Alterations in Serum Polyunsaturated Fatty Acids and Eicosanoids in Patients with Mild to Moderate Chronic Obstructive Pulmonary Disease (COPD)
Source: Int J Mol Sci. 2016 Sep 20;17(9):1583. doi: 10.3390/ijms17091583 (PMC5037848; doi:10.3390/ijms17091583)
Supplement: Supplementary file 1 [file ijms-17-01583-s001.zip]

Archive with 7 entries (6 files):
- ijms-143212-Supplementary Materials/
- ijms-143212-Supplementary Materials/ijms-143212-Figure S1.pdf
- ijms-143212-Supplementary Materials/ijms-143212-Figure S2.pdf
- ijms-143212-Supplementary Materials/ijms-143212-supplementary.pdf
- ijms-143212-Supplementary Materials/ijms-143212-Table S1.xlsx
- ijms-143212-Supplementary Materials/ijms-143212-Table S2.xlsx
- ijms-143212-Supplementary Materials/ijms-143212-Table S3.xlsx
