# Supplementary material for: Alterations in Serum Polyunsaturated Fatty Acids and Eicosanoids in Patients with Mild to Moderate Chronic Obstructive Pulmonary Disease (COPD)
Source: Int J Mol Sci. 2016 Sep 20;17(9):1583. doi: 10.3390/ijms17091583 (PMC5037848; doi:10.3390/ijms17091583)
Supplement: Supplementary file 1 [file ijms-17-01583-s001.zip › ijms-143212-Supplementary Materials/ijms-143212-Table S1.xlsx]

## Sheet: SAMPLE META DATA
Titz et al. (2016) Alterations in serum polyunsaturated fatty acids and eicosanoids in patients with mild to moderate COPD .
SI TABLE 1: Lipidomics data table
META DATA
SAMPLE ID	Group	SEX [M=MALE, F=FEMALE]	AGE [YEARS]	BMI [kg/m2]	RACE	PACK YEAR	QUITTING DURATION [YEARS]	GOLD Stage	FEV1%pred	TLCO%Pred	FEV1/FVC [%]	FVC%pred	STATIN USE [TRUE = YES, FALSE = NO]	PUFA USE [TRUE = YES, FALSE = NO]
1001	COPD	M	56	29.8	WHITE	117.5	0	GOLD 2	53.25	70.7	54.87	77.1	FALSE	FALSE
1003	COPD	M	62	21.1	WHITE	52	0	GOLD 2	70.25	57.8	49.36	111	TRUE	FALSE
1004	COPD	M	59	32.2	WHITE	18	0	GOLD 2	56	65.65	39.94	101.65	TRUE	FALSE
1005	COPD	M	55	31.5	WHITE	68	0	GOLD 1	78	48.4	56.535	111	FALSE	FALSE
1006	COPD	M	70	24.9	WHITE	27.18	0	GOLD 1	70.55	38.9	48.635	109.75	FALSE	FALSE
1007	COPD	F	67	30.3	WHITE	104	0	GOLD 2	79.85	75.25	60.365	108.35	TRUE	FALSE
1011	COPD	M	47	24.2	WHITE	52.5	0	GOLD 1	99.2	66.8	62.49	127.4	FALSE	FALSE
1012	COPD	F	57	29.6	WHITE	58.5	0	GOLD 2	50	50.15	45.595	91.75	FALSE	FALSE
1013	COPD	F	60	23.8	WHITE	55	0	GOLD 2	58.5	37.9	42.38	115.85	FALSE	TRUE
1015	COPD	M	55	24.5	WHITE	37	0	GOLD 1	89.2	59.1	64.425	110.6	FALSE	FALSE
1017	COPD	M	48	25.1	WHITE	30	0	GOLD 1	81	102.7	53.17	124.95	FALSE	FALSE
1018	COPD	F	64	20.7	WHITE	48	0	GOLD 1	92.05	58.45	64.815	119.25	FALSE	TRUE
1019	COPD	F	51	20.9	WHITE	28.29	0	GOLD 2	64.25	43.55	47.58	107.9	FALSE	FALSE
1020	COPD	M	50	24.9	WHITE	17	0	GOLD 2	63.15	79.85	49.41	103.8	FALSE	FALSE
1022	COPD	M	55	22.3	WHITE	30.37	0	GOLD 2	64.95	83.1	47.835	104.5	FALSE	FALSE
1023	COPD	M	64	26.9	WHITE	52	0	GOLD 2	65.8	63.25	53.575	95.45	TRUE	TRUE
1024	COPD	F	59	23.2	WHITE	23	0	GOLD 1	97.05	52.25	56.09	144.9	FALSE	FALSE
1026	COPD	M	63	27	WHITE	60	0	GOLD 2	53.85	63.05	46.63	91.05	FALSE	FALSE
1027	COPD	F	57	20	WHITE	41	0	GOLD 1	75.55	52.05	49.51	129	FALSE	FALSE
1030	COPD	F	43	33.6	WHITE	45	0	GOLD 2	43.05	63.35	47.655	76.8	FALSE	FALSE
1031	COPD	F	65	23.9	WHITE	32.5	0	GOLD 2	56.9	45.55	50.275	91.85	FALSE	FALSE
1032	COPD	M	56	29.6	WHITE	57	0	GOLD 2	54.15	63.55	62.635	69.3	FALSE	FALSE
1033	COPD	M	64	33.1	WHITE	10.5	0	GOLD 2	54.85	62.7	57.185	75.05	FALSE	FALSE
1034	COPD	F	58	22.7	WHITE	58.5	0	GOLD 1	83.2	66.8	55.655	123.45	TRUE	FALSE
1035	COPD	M	49	25.5	WHITE	20	0	GOLD 1	81.15	103.75	57.435	112.7	FALSE	FALSE
1036	COPD	F	46	27.8	WHITE	30	0	GOLD 1	85.35	90	61.79	118.85	FALSE	FALSE
1037	COPD	M	65	24.6	WHITE	50	0	GOLD 1	115.5	97.35	63.385	143.15	FALSE	FALSE
1042	COPD	M	62	20.9	WHITE	92	0	GOLD 2	82.55	65.65	49.28	131.7	FALSE	FALSE
1044	COPD	F	61	25.2	WHITE	33	0	GOLD 2	75.1	69.95	69.995	90.3	FALSE	FALSE
1045	COPD	F	55	29.6	WHITE	60	0	GOLD 2	52.5	67.25	42.93	104.05	TRUE	FALSE
1046	COPD	F	66	27	WHITE	56.1	0	GOLD 1	84.75	82.95	61.835	115.3	TRUE	FALSE
1047	COPD	M	59	32.2	WHITE	47	0	GOLD 2	74.45	59.45	44.52	131.05	TRUE	FALSE
1049	COPD	F	62	31.5	WHITE	39.5	0	GOLD 1	87.85	79.8	60.28	118.4	TRUE	FALSE
1051	COPD	F	65	24.5	WHITE	42.5	0	GOLD 2	56.5	48.65	48.33	97.6	FALSE	FALSE
1052	COPD	M	59	34.1	WHITE	47	0	GOLD 1	84.4	65.8	65.025	102.75	TRUE	FALSE
1053	COPD	M	51	25.4	WHITE	22.5	0	GOLD 1	94.45	101.55	60.365	125.45	FALSE	FALSE
1056	COPD	M	44	23.2	BLACK OR AFRICAN AMERICAN	18.75	0	GOLD 1	107.75	91.85	69.65	126.65	FALSE	FALSE
1057	COPD	F	60	28.8	WHITE	45	0	GOLD 1	102.8	74.7	63.93	134.6	FALSE	FALSE
1061	COPD	M	68	28.4	WHITE	52.07	0	GOLD 1	102.35	63.45	58.005	136.35	TRUE	FALSE
2001	FS	M	66	28.9	WHITE	15	30.6		94.05	80.9	66.555	105.25	FALSE	FALSE
2004	FS	M	64	28	WHITE	46	26.69		109.3	97.8	84.81	100.4	FALSE	FALSE
2005	FS	F	61	24.8	WHITE	19	6.72		113.65	81.2	72.265	127.15	FALSE	FALSE
2008	FS	M	68	31.6	WHITE	46	5.76		115.25	92.9	71.34	122.2	TRUE	FALSE
2012	FS	F	42	20.9	WHITE	18	7.98		109.15	89.7	76.28	122.6	FALSE	FALSE
2013	FS	F	43	29.5	WHITE	23	6.85		102.9	84.3	69.615	127.65	FALSE	FALSE
2014	FS	F	51	25.4	WHITE	28	7		137.05	94.75	73.245	157.45	FALSE	FALSE
2015	FS	M	44	31.6	WHITE	25	1.06		116.05	97.7	75.695	125.65	FALSE	FALSE
2019	FS	M	54	29.9	WHITE	16	25.93		106.75	105.6	69.46	122.25	FALSE	FALSE
2020	FS	M	51	25.7	WHITE	28	7.93		114.45	114.4	75.385	122.45	FALSE	FALSE
2021	FS	M	59	28	WHITE	25	20.94		128.6	97.25	72.05	140.9	FALSE	FALSE
2022	FS	F	64	23.2	WHITE	26	9.68		106.8	74.1	70.88	127.15	FALSE	FALSE
2024	FS	M	55	25.5	WHITE	41.75	2.01		105.3	94.5	74.745	112.7	FALSE	FALSE
2025	FS	M	48	30.6	BLACK OR AFRICAN AMERICAN	21	10.01		97.8	88.2	70.11	113.5	FALSE	FALSE
2026	FS	M	56	26.1	WHITE	33	2.52		88.35	93.5	64.7	108.5	FALSE	FALSE
2027	FS	F	56	31.5	WHITE	25	20.05		100.1	76	71.23	118.95	FALSE	FALSE
2028	FS	F	52	23.4	WHITE	31	2.28		121.65	77.4	75.385	136.45	FALSE	FALSE
2029	FS	F	58	24.4	WHITE	15	4.03		109.5	74.15	69.76	127.6	FALSE	FALSE
2030	FS	M	53	29.4	WHITE	14	27.08		116.3	97.3	72.225	129.4	FALSE	FALSE
2031	FS	F	62	27.9	WHITE	46.25	7.11		115.05	59.7	71.085	132.8	TRUE	FALSE
2034	FS	M	57	24.5	WHITE	10	33.03		116.55	110.7	74.615	121.25	FALSE	FALSE
2035	FS	F	55	25.9	WHITE	20	7.12		127.9	82.15	76.425	141.2	FALSE	TRUE
2036	FS	M	60	24.4	WHITE	19.5	11.54		97.1	95.1	65.74	116.5	TRUE	FALSE
2037	FS	M	57	30	WHITE	70	13.13		103.05	120.25	71.13	115.8	FALSE	FALSE
2038	FS	F	53	22.9	WHITE	11.5	11.12		99.75	75.65	77.8	108.75	TRUE	FALSE
2041	FS	M	52	29	WHITE	33	4.81		105.5	97.55	71.305	117.8	FALSE	FALSE
2044	FS	F	56	21.5	WHITE	15	22.43		107.5	75.55	75.945	120.45	FALSE	TRUE
2045	FS	M	70	24.7	WHITE	55	32.28		128.3	90.95	70.53	139.7	FALSE	TRUE
2047	FS	M	52	33.3	WHITE	35	3.13		102.15	107.8	66.425	123.6	FALSE	FALSE
2049	FS	M	49	30.1	WHITE	20	10.31		132.25	118.5	72.4	147.05	FALSE	FALSE
2051	FS	M	60	28	WHITE	22.5	32.39		96.25	106.5	70.49	107.6	FALSE	FALSE
2052	FS	F	63	26	WHITE	34	6.08		89.35	85.05	61.545	122.25	TRUE	FALSE
2054	FS	M	65	29.3	WHITE	33.75	23.72		94.2	104.3	61.87	116.55	TRUE	TRUE
2055	FS	F	64	29.7	WHITE	35	3.84		110.95	72.55	73.585	126	TRUE	TRUE
2056	FS	F	66	23.7	WHITE	12	26.53		113.15	93.7	78.57	117.4	FALSE	FALSE
2058	FS	F	63	29.4	WHITE	31	16.66		107.7	78.55	75.83	119.4	FALSE	FALSE
2061	FS	F	65	26.1	WHITE	43	8.68		94.85	86.1	73.115	108.5	TRUE	TRUE
2064	FS	M	55	29.4	WHITE	11	31.87		89.05	91.1	72.98	96.55	TRUE	FALSE
3001	CS	M	45	27.5	WHITE	31	0		83.35	57.75	68.855	98.25	FALSE	FALSE
3002	CS	M	54	31.1	WHITE	40	0		90.5	86.8	73.06	97.4	FALSE	FALSE
3003	CS	M	53	24.1	WHITE	29.6	0		101.3	103.1	75.59	107.5	FALSE	FALSE
3004	CS	M	57	27.8	WHITE	41	0		93.3	81.4	64.49	115.15	FALSE	FALSE
3006	CS	M	55	30.6	WHITE	53.75	0		105.8	82.7	66.11	126	FALSE	FALSE
3007	CS	M	57	34.3	WHITE	35	0		101.4	97.8	77.98	103.55	FALSE	FALSE
3008	CS	F	45	22.8	WHITE	23.3	0		101.8	65.75	72.32	119.55	FALSE	FALSE
3009	CS	M	51	24.9	WHITE	35	0		97.3	87.05	66.175	118.2	FALSE	FALSE
3012	CS	F	51	20.8	WHITE	36	0		103.2	68.5	71.71	122.55	FALSE	FALSE
3014	CS	M	43	21.1	WHITE	28	0		128.4	86	76.025	137.35	FALSE	FALSE
3016	CS	M	63	27.4	WHITE	21.7	0		121.6	103.75	69.63	137	FALSE	FALSE
3018	CS	M	63	27.7	WHITE	64	0		129.1	92.75	64.615	156.45	TRUE	TRUE
3019	CS	F	64	26.5	WHITE	22.5	0		98.7	79.85	69.71	118.15	FALSE	FALSE
3021	CS	M	62	29	WHITE	75	0		85.4	66.85	67.31	96.45	FALSE	FALSE
3022	CS	F	55	22.9	WHITE	15.5	0		125.35	87.5	75.67	139.35	FALSE	FALSE
3024	CS	F	43	25.2	WHITE	25	0		108.5	78.3	68.305	136.6	FALSE	FALSE
3025	CS	F	54	25.9	WHITE	60	0		112.55	69.2	79.18	120.55	FALSE	FALSE
3026	CS	F	55	21.2	WHITE	60	0		98.25	76.95	68.575	120.25	FALSE	FALSE
3028	CS	M	59	30.8	WHITE	54	0		103.15	88.45	70.275	116.2	TRUE	FALSE
3029	CS	M	52	29.9	WHITE	36	0		92.25	71.05	73.345	102	FALSE	FALSE
3030	CS	M	60	28.3	WHITE	15	0		102.3	107.95	63.185	127.3	FALSE	FALSE
3031	CS	F	59	29.8	WHITE	30	0		86.7	69.85	68.87	107.05	FALSE	FALSE
3034	CS	F	64	21.3	WHITE	17	0		103.9	75.1	69.31	124.65	FALSE	FALSE
3035	CS	M	68	29.1	WHITE	26	0		104.45	68.1	68.75	117	FALSE	FALSE
3037	CS	M	52	27.7	WHITE	15.5	0		98.4	83.1	65.07	121.85	FALSE	FALSE
3039	CS	M	51	25.9	WHITE	48.75	0		94.55	70.1	67.93	112.2	FALSE	FALSE
3040	CS	M	60	31.1	WHITE	22	0		113.35	107.4	67.22	133.05	FALSE	FALSE
3042	CS	F	60	26.3	WHITE	35.25	0		102.2	70.2	71.285	121.15	FALSE	FALSE
3045	CS	F	64	24	WHITE	39	0		85.35	64.7	60.72	115.6	FALSE	FALSE
3046	CS	F	55	31.5	WHITE	37.5	0		94.7	73.65	66.535	120.45	FALSE	FALSE
3047	CS	F	50	30.1	WHITE	37	0		122.9	88.2	77.445	135.3	FALSE	FALSE
3049	CS	M	49	29.4	WHITE	13.71	0		94.15	86.95	61.605	124.25	FALSE	FALSE
3051	CS	F	62	28.3	WHITE	26.25	0		99.5	67.75	80.005	103.95	FALSE	FALSE
3055	CS	M	66	27.8	WHITE	49	0		91.95	80.6	65.69	109	FALSE	FALSE
3059	CS	F	51	28.1	WHITE	32	0		102.95	67.85	84.06	101.9	FALSE	FALSE
3060	CS	M	48	28.8	WHITE	23.25	0		97.05	103.65	71.29	110.75	FALSE	FALSE
3061	CS	F	65	31.8	WHITE	32.3	0		90.75	81.15	67.335	109.05	FALSE	FALSE
3064	CS	M	45	30.5	BLACK OR AFRICAN AMERICAN	23	0		102.15	67.2	73.055	113.85	FALSE	FALSE
3065	CS	F	55	26.6	WHITE	25.2	0		112.1	74	69.945	135.5	FALSE	FALSE
4002	NS	M	47	21.2	WHITE	0	0		93.6	87.5	79.345	96.2	FALSE	FALSE
4003	NS	M	54	27.7	WHITE	0	0		96.65	98.9	68.355	111.3	FALSE	FALSE
4004	NS	M	51	20.5	WHITE	0	0		100.15	101.9	60.43	132.45	FALSE	FALSE
4005	NS	F	58	22.6	WHITE	0	0		105.35	82.55	75.35	117.2	FALSE	FALSE
4007	NS	M	49	25.3	WHITE	0	0		115.3	101.75	71.36	129.25	FALSE	FALSE
4008	NS	F	41	23.9	WHITE	0	0		112.05	82	88.96	108.7	FALSE	FALSE
4009	NS	F	60	26.1	WHITE	0	0		119	93.25	75.3	131.5	FALSE	FALSE
4011	NS	M	62	33.7	WHITE	0	0		121.9	94.6	81.295	114.9	FALSE	FALSE
4012	NS	F	57	28.8	WHITE	0	0		122.45	98.95	76.96	133.35	FALSE	FALSE
4015	NS	M	44	25.7	WHITE	0	0		107.45	95.7	69.795	128.35	FALSE	FALSE
4017	NS	F	60	29.1	WHITE	0	0		107.25	76.8	79.475	111.55	FALSE	FALSE
4019	NS	M	53	25.3	WHITE	0	0		113.45	97.25	75.1	120.5	FALSE	FALSE
4022	NS	F	63	27.2	WHITE	0	0		127.85	82.95	79.36	134.7	FALSE	FALSE
4025	NS	F	53	21.8	WHITE	0	0		119.9	89.1	70.255	146.05	FALSE	FALSE
4027	NS	M	60	25	WHITE	0	0		110.95	85	68.325	128.3	FALSE	FALSE
4028	NS	F	54	18.7	WHITE	0	0		112.65	83.25	75.635	121.25	FALSE	FALSE
4030	NS	F	56	20.8	WHITE	0	0		108.8	77.75	74.825	123.2	FALSE	FALSE
4031	NS	M	62	33.7	WHITE	0	0		85.9	112.8	80.765	81.25	FALSE	FALSE
4032	NS	M	63	24.6	WHITE	0	0		101.15	111.4	62.13	127.8	FALSE	FALSE
4034	NS	F	62	26.3	WHITE	0	0		126.45	80.55	71.4	147.05	FALSE	FALSE
4035	NS	M	54	29	WHITE	0	0		119.6	102.9	78.38	122.55	FALSE	FALSE
4037	NS	M	63	27	WHITE	0	0		111.9	107.4	73.055	119.65	FALSE	FALSE
4039	NS	M	67	32	WHITE	0	0		100.25	101.6	64.875	119.5	FALSE	FALSE
4040	NS	M	47	34.1	WHITE	0	0		124.4	98.8	76.465	132.7	FALSE	TRUE
4041	NS	M	64	23.4	WHITE	0	0		110.35	93.9	72.17	116.35	FALSE	FALSE
4042	NS	M	60	25.8	WHITE	0	0		88.25	95.7	63.67	107.45	FALSE	FALSE
4043	NS	F	62	34.2	WHITE	0	0		108.6	101.5	67.85	135.8	TRUE	TRUE
4045	NS	F	62	24.8	WHITE	0	0		123.45	90.4	70.85	147.55	FALSE	FALSE
4046	NS	M	43	27	BLACK OR AFRICAN AMERICAN	0	0		102.7	98.75	81.245	103.7	FALSE	FALSE
4047	NS	F	67	33.4	WHITE	0	0		104	104.05	71.36	120.8	FALSE	FALSE
4048	NS	F	52	27.1	WHITE	0	0		105.8	94.9	80.89	111.55	FALSE	FALSE
4049	NS	M	51	28	WHITE	0	0		79.55	87.5	71.2	87.65	FALSE	FALSE
4050	NS	M	53	23.6	WHITE	0	0		118.1	106.5	72.72	129.4	FALSE	FALSE
4052	NS	M	48	32.9	WHITE	0	0		123.8	137.3	77.215	129.7	FALSE	FALSE
4054	NS	F	51	21.6	WHITE	0	0		107.35	80.05	79.09	116.2	FALSE	FALSE
4055	NS	F	62	28.2	WHITE	0	0		119.7	87.85	74.51	133.9	FALSE	FALSE
4056	NS	M	59	22.4	WHITE	0	0		120.85	83.8	75.6	125.5	TRUE	TRUE
4057	NS	F	48	28.4	WHITE	0	0		113.8	79.55	71.395	137.1	FALSE	FALSE
4061	NS	F	53	29.2	WHITE	0	0		120.6	87.55	75.105	137.75	FALSE	FALSE

## Sheet: LIPIDOMICS DATA
Titz et al. (2016) Alterations in serum polyunsaturated fatty acids and eicosanoids in patients with mild to moderate COPD .
SI TABLE 1: Lipidomics data table
LIPIDOMICS DATA
SAMPLE ID	LIPID CLASS	LIPID SPECIES	CONCENTRATION	UNIT	POLARITY	ION	PARENT MASS	FRAGMENT MASS 1	FRAGMENT MASS 2
1001	EICO	11_12-DHET	0.0103642	nmol/mL	Negative	[M-H]-	337.2	167
1003	EICO	11_12-DHET	0.0607092	nmol/mL	Negative	[M-H]-	337.2	167
1004	EICO	11_12-DHET	0.0059297	nmol/mL	Negative	[M-H]-	337.2	167
1005	EICO	11_12-DHET	0.0104591	nmol/mL	Negative	[M-H]-	337.2	167
1006	EICO	11_12-DHET	0.0063049	nmol/mL	Negative	[M-H]-	337.2	167
1007	EICO	11_12-DHET	0.00459745	nmol/mL	Negative	[M-H]-	337.2	167
1011	EICO	11_12-DHET	0.0052357	nmol/mL	Negative	[M-H]-	337.2	167
1012	EICO	11_12-DHET	0.00719816	nmol/mL	Negative	[M-H]-	337.2	167
1013	EICO	11_12-DHET	0.00777402	nmol/mL	Negative	[M-H]-	337.2	167
1015	EICO	11_12-DHET	0.00523075	nmol/mL	Negative	[M-H]-	337.2	167
1017	EICO	11_12-DHET	0.0137061	nmol/mL	Negative	[M-H]-	337.2	167
1018	EICO	11_12-DHET	0.0060083	nmol/mL	Negative	[M-H]-	337.2	167
1019	EICO	11_12-DHET	0.0170427	nmol/mL	Negative	[M-H]-	337.2	167
1020	EICO	11_12-DHET	0.0182538	nmol/mL	Negative	[M-H]-	337.2	167
1022	EICO	11_12-DHET	0.0108257	nmol/mL	Negative	[M-H]-	337.2	167
1023	EICO	11_12-DHET	0.00649081	nmol/mL	Negative	[M-H]-	337.2	167
1024	EICO	11_12-DHET	0.00596519	nmol/mL	Negative	[M-H]-	337.2	167
1026	EICO	11_12-DHET	0.011235	nmol/mL	Negative	[M-H]-	337.2	167
1027	EICO	11_12-DHET	0.0120127	nmol/mL	Negative	[M-H]-	337.2	167
1030	EICO	11_12-DHET	0.00521145	nmol/mL	Negative	[M-H]-	337.2	167
1031	EICO	11_12-DHET	0.0134817	nmol/mL	Negative	[M-H]-	337.2	167
1032	EICO	11_12-DHET	0.00938703	nmol/mL	Negative	[M-H]-	337.2	167
1033	EICO	11_12-DHET	0.00804502	nmol/mL	Negative	[M-H]-	337.2	167
1034	EICO	11_12-DHET	0.0106415	nmol/mL	Negative	[M-H]-	337.2	167
1035	EICO	11_12-DHET	0.00759963	nmol/mL	Negative	[M-H]-	337.2	167
1036	EICO	11_12-DHET	0.00990066	nmol/mL	Negative	[M-H]-	337.2	167
1037	EICO	11_12-DHET	0.00821195	nmol/mL	Negative	[M-H]-	337.2	167
1040	EICO	11_12-DHET	0.0100826	nmol/mL	Negative	[M-H]-	337.2	167
1042	EICO	11_12-DHET	0.0206963	nmol/mL	Negative	[M-H]-	337.2	167
1044	EICO	11_12-DHET	0.0132734	nmol/mL	Negative	[M-H]-	337.2	167
1045	EICO	11_12-DHET	0.00616578	nmol/mL	Negative	[M-H]-	337.2	167
1046	EICO	11_12-DHET	0.01221	nmol/mL	Negative	[M-H]-	337.2	167
1047	EICO	11_12-DHET	0.0127054	nmol/mL	Negative	[M-H]-	337.2	167
1049	EICO	11_12-DHET	0.00769649	nmol/mL	Negative	[M-H]-	337.2	167
1051	EICO	11_12-DHET	0.00556715	nmol/mL	Negative	[M-H]-	337.2	167
1052	EICO	11_12-DHET	0.0065944	nmol/mL	Negative	[M-H]-	337.2	167
1053	EICO	11_12-DHET	0.00811945	nmol/mL	Negative	[M-H]-	337.2	167
1056	EICO	11_12-DHET	0.00985559	nmol/mL	Negative	[M-H]-	337.2	167
1057	EICO	11_12-DHET	0.00976075	nmol/mL	Negative	[M-H]-	337.2	167
1061	EICO	11_12-DHET	0.00938994	nmol/mL	Negative	[M-H]-	337.2	167
2001	EICO	11_12-DHET	0.003292	nmol/mL	Negative	[M-H]-	337.2	167
2004	EICO	11_12-DHET	0.00941659	nmol/mL	Negative	[M-H]-	337.2	167
2005	EICO	11_12-DHET	0.00691998	nmol/mL	Negative	[M-H]-	337.2	167
2008	EICO	11_12-DHET	0.0056762	nmol/mL	Negative	[M-H]-	337.2	167
2012	EICO	11_12-DHET	0.00452063	nmol/mL	Negative	[M-H]-	337.2	167
2013	EICO	11_12-DHET	0.0137388	nmol/mL	Negative	[M-H]-	337.2	167
2014	EICO	11_12-DHET	0.0074795	nmol/mL	Negative	[M-H]-	337.2	167
2015	EICO	11_12-DHET	0.00520444	nmol/mL	Negative	[M-H]-	337.2	167
2019	EICO	11_12-DHET	0.0063121	nmol/mL	Negative	[M-H]-	337.2	167
2020	EICO	11_12-DHET	0.0146411	nmol/mL	Negative	[M-H]-	337.2	167
2021	EICO	11_12-DHET	0.00572189	nmol/mL	Negative	[M-H]-	337.2	167
2022	EICO	11_12-DHET	0.00645659	nmol/mL	Negative	[M-H]-	337.2	167
2023	EICO	11_12-DHET	0.00698125	nmol/mL	Negative	[M-H]-	337.2	167
2023	EICO	11_12-DHET	0.00698125	nmol/mL	Negative	[M-H]-	337.2	167
2024	EICO	11_12-DHET	0.00543019	nmol/mL	Negative	[M-H]-	337.2	167
2025	EICO	11_12-DHET	0.00770102	nmol/mL	Negative	[M-H]-	337.2	167
2026	EICO	11_12-DHET	0.00678092	nmol/mL	Negative	[M-H]-	337.2	167
2027	EICO	11_12-DHET	0.00837371	nmol/mL	Negative	[M-H]-	337.2	167
2028	EICO	11_12-DHET	0.00777582	nmol/mL	Negative	[M-H]-	337.2	167
2029	EICO	11_12-DHET	0.00790209	nmol/mL	Negative	[M-H]-	337.2	167
2030	EICO	11_12-DHET	0.00966959	nmol/mL	Negative	[M-H]-	337.2	167
2031	EICO	11_12-DHET	0.00548372	nmol/mL	Negative	[M-H]-	337.2	167
2034	EICO	11_12-DHET	0.00717173	nmol/mL	Negative	[M-H]-	337.2	167
2035	EICO	11_12-DHET	0.00439349	nmol/mL	Negative	[M-H]-	337.2	167
2036	EICO	11_12-DHET	0.00427347	nmol/mL	Negative	[M-H]-	337.2	167
2037	EICO	11_12-DHET	0.00679949	nmol/mL	Negative	[M-H]-	337.2	167
2038	EICO	11_12-DHET	0.00802036	nmol/mL	Negative	[M-H]-	337.2	167
2041	EICO	11_12-DHET	0.0121467	nmol/mL	Negative	[M-H]-	337.2	167
2044	EICO	11_12-DHET	0.00580185	nmol/mL	Negative	[M-H]-	337.2	167
2045	EICO	11_12-DHET	0.00777672	nmol/mL	Negative	[M-H]-	337.2	167
2047	EICO	11_12-DHET	0.00665528	nmol/mL	Negative	[M-H]-	337.2	167
2049	EICO	11_12-DHET	0.005302	nmol/mL	Negative	[M-H]-	337.2	167
2051	EICO	11_12-DHET	0.00975004	nmol/mL	Negative	[M-H]-	337.2	167
2052	EICO	11_12-DHET	0.00965372	nmol/mL	Negative	[M-H]-	337.2	167
2054	EICO	11_12-DHET	0.00635643	nmol/mL	Negative	[M-H]-	337.2	167
2055	EICO	11_12-DHET	0.002658	nmol/mL	Negative	[M-H]-	337.2	167
2056	EICO	11_12-DHET	0.00491137	nmol/mL	Negative	[M-H]-	337.2	167
2058	EICO	11_12-DHET	0.00322601	nmol/mL	Negative	[M-H]-	337.2	167
2060	EICO	11_12-DHET	0.0106293	nmol/mL	Negative	[M-H]-	337.2	167
2061	EICO	11_12-DHET	0.0136082	nmol/mL	Negative	[M-H]-	337.2	167
2064	EICO	11_12-DHET	0.00517484	nmol/mL	Negative	[M-H]-	337.2	167
3001	EICO	11_12-DHET	0.00604896	nmol/mL	Negative	[M-H]-	337.2	167
3002	EICO	11_12-DHET	0.0185289	nmol/mL	Negative	[M-H]-	337.2	167
3003	EICO	11_12-DHET	0.0127604	nmol/mL	Negative	[M-H]-	337.2	167
3004	EICO	11_12-DHET	0.00957482	nmol/mL	Negative	[M-H]-	337.2	167
3005	EICO	11_12-DHET	0.0268822	nmol/mL	Negative	[M-H]-	337.2	167
3006	EICO	11_12-DHET	0.0153168	nmol/mL	Negative	[M-H]-	337.2	167
3007	EICO	11_12-DHET	0.0066112	nmol/mL	Negative	[M-H]-	337.2	167
3008	EICO	11_12-DHET	0.013795	nmol/mL	Negative	[M-H]-	337.2	167
3009	EICO	11_12-DHET	0.0094258	nmol/mL	Negative	[M-H]-	337.2	167
3012	EICO	11_12-DHET	0.0112056	nmol/mL	Negative	[M-H]-	337.2	167
3014	EICO	11_12-DHET	0.00904585	nmol/mL	Negative	[M-H]-	337.2	167
3016	EICO	11_12-DHET	0.0101444	nmol/mL	Negative	[M-H]-	337.2	167
3018	EICO	11_12-DHET	0.0105005	nmol/mL	Negative	[M-H]-	337.2	167
3019	EICO	11_12-DHET	0.00629768	nmol/mL	Negative	[M-H]-	337.2	167
3021	EICO	11_12-DHET	0.00552437	nmol/mL	Negative	[M-H]-	337.2	167
3022	EICO	11_12-DHET	0.00942456	nmol/mL	Negative	[M-H]-	337.2	167
3024	EICO	11_12-DHET	0.0099525	nmol/mL	Negative	[M-H]-	337.2	167
3025	EICO	11_12-DHET	0.00950208	nmol/mL	Negative	[M-H]-	337.2	167
3026	EICO	11_12-DHET	0.0193955	nmol/mL	Negative	[M-H]-	337.2	167
3028	EICO	11_12-DHET	0.0146916	nmol/mL	Negative	[M-H]-	337.2	167
3029	EICO	11_12-DHET	0.00843536	nmol/mL	Negative	[M-H]-	337.2	167
3030	EICO	11_12-DHET	0.0168821	nmol/mL	Negative	[M-H]-	337.2	167
3031	EICO	11_12-DHET	0.00591078	nmol/mL	Negative	[M-H]-	337.2	167
3034	EICO	11_12-DHET	0.00825994	nmol/mL	Negative	[M-H]-	337.2	167
3035	EICO	11_12-DHET	0.00291111	nmol/mL	Negative	[M-H]-	337.2	167
3037	EICO	11_12-DHET	0.00979135	nmol/mL	Negative	[M-H]-	337.2	167
3039	EICO	11_12-DHET	0.0118827	nmol/mL	Negative	[M-H]-	337.2	167
3040	EICO	11_12-DHET	0.00516094	nmol/mL	Negative	[M-H]-	337.2	167
3042	EICO	11_12-DHET	0.0110399	nmol/mL	Negative	[M-H]-	337.2	167
3045	EICO	11_12-DHET	0.00692623	nmol/mL	Negative	[M-H]-	337.2	167
3046	EICO	11_12-DHET	0.00726471	nmol/mL	Negative	[M-H]-	337.2	167
3047	EICO	11_12-DHET	0.0118094	nmol/mL	Negative	[M-H]-	337.2	167
3049	EICO	11_12-DHET	0.0168085	nmol/mL	Negative	[M-H]-	337.2	167
3051	EICO	11_12-DHET	0.00598125	nmol/mL	Negative	[M-H]-	337.2	167
3055	EICO	11_12-DHET	0.012753	nmol/mL	Negative	[M-H]-	337.2	167
3059	EICO	11_12-DHET	0.00440956	nmol/mL	Negative	[M-H]-	337.2	167
3060	EICO	11_12-DHET	0.00979034	nmol/mL	Negative	[M-H]-	337.2	167
3061	EICO	11_12-DHET	0.0035824	nmol/mL	Negative	[M-H]-	337.2	167
3064	EICO	11_12-DHET	0.00785011	nmol/mL	Negative	[M-H]-	337.2	167
3065	EICO	11_12-DHET	0.0119162	nmol/mL	Negative	[M-H]-	337.2	167
4002	EICO	11_12-DHET	0.00584496	nmol/mL	Negative	[M-H]-	337.2	167
4003	EICO	11_12-DHET	0.00660736	nmol/mL	Negative	[M-H]-	337.2	167
4004	EICO	11_12-DHET	0.00766516	nmol/mL	Negative	[M-H]-	337.2	167
4005	EICO	11_12-DHET	0.0107771	nmol/mL	Negative	[M-H]-	337.2	167
4007	EICO	11_12-DHET	0.00616328	nmol/mL	Negative	[M-H]-	337.2	167
4008	EICO	11_12-DHET	0.00602311	nmol/mL	Negative	[M-H]-	337.2	167
4009	EICO	11_12-DHET	0.00412631	nmol/mL	Negative	[M-H]-	337.2	167
4011	EICO	11_12-DHET	0.0105892	nmol/mL	Negative	[M-H]-	337.2	167
4012	EICO	11_12-DHET	0.0100096	nmol/mL	Negative	[M-H]-	337.2	167
4015	EICO	11_12-DHET	0.00438337	nmol/mL	Negative	[M-H]-	337.2	167
4017	EICO	11_12-DHET	0.00700956	nmol/mL	Negative	[M-H]-	337.2	167
4019	EICO	11_12-DHET	0.00896364	nmol/mL	Negative	[M-H]-	337.2	167
4022	EICO	11_12-DHET	0.00550016	nmol/mL	Negative	[M-H]-	337.2	167
4025	EICO	11_12-DHET	0.00506464	nmol/mL	Negative	[M-H]-	337.2	167
4026	EICO	11_12-DHET	0.00771221	nmol/mL	Negative	[M-H]-	337.2	167
4027	EICO	11_12-DHET	0.00579208	nmol/mL	Negative	[M-H]-	337.2	167
4028	EICO	11_12-DHET	0.00672283	nmol/mL	Negative	[M-H]-	337.2	167
4030	EICO	11_12-DHET	0.00689057	nmol/mL	Negative	[M-H]-	337.2	167
4031	EICO	11_12-DHET	0.00353616	nmol/mL	Negative	[M-H]-	337.2	167
4032	EICO	11_12-DHET	0.00628134	nmol/mL	Negative	[M-H]-	337.2	167
4034	EICO	11_12-DHET	0.0054232	nmol/mL	Negative	[M-H]-	337.2	167
4035	EICO	11_12-DHET	0.0142745	nmol/mL	Negative	[M-H]-	337.2	167
4037	EICO	11_12-DHET	0.0118965	nmol/mL	Negative	[M-H]-	337.2	167
4039	EICO	11_12-DHET	0.00647366	nmol/mL	Negative	[M-H]-	337.2	167
4040	EICO	11_12-DHET	0.00742102	nmol/mL	Negative	[M-H]-	337.2	167
4041	EICO	11_12-DHET	0.00861095	nmol/mL	Negative	[M-H]-	337.2	167
4042	EICO	11_12-DHET	0.0104775	nmol/mL	Negative	[M-H]-	337.2	167
4043	EICO	11_12-DHET	0.00394367	nmol/mL	Negative	[M-H]-	337.2	167
4045	EICO	11_12-DHET	0.00637334	nmol/mL	Negative	[M-H]-	337.2	167
4046	EICO	11_12-DHET	0.00492642	nmol/mL	Negative	[M-H]-	337.2	167
4047	EICO	11_12-DHET	0.0179766	nmol/mL	Negative	[M-H]-	337.2	167
4048	EICO	11_12-DHET	0.0104486	nmol/mL	Negative	[M-H]-	337.2	167
4049	EICO	11_12-DHET	0.0039863	nmol/mL	Negative	[M-H]-	337.2	167
4050	EICO	11_12-DHET	0.00491021	nmol/mL	Negative	[M-H]-	337.2	167
4052	EICO	11_12-DHET	0.00582137	nmol/mL	Negative	[M-H]-	337.2	167
4054	EICO	11_12-DHET	0.00492085	nmol/mL	Negative	[M-H]-	337.2	167
4055	EICO	11_12-DHET	0.00770963	nmol/mL	Negative	[M-H]-	337.2	167
4056	EICO	11_12-DHET	0.0069322	nmol/mL	Negative	[M-H]-	337.2	167
4057	EICO	11_12-DHET	0.0112909	nmol/mL	Negative	[M-H]-	337.2	167
4061	EICO	11_12-DHET	0.0062107	nmol/mL	Negative	[M-H]-	337.2	167
1001	EICO	11-HETE	0.00742279	nmol/mL	Negative	[M-H]-	319.2	167.2
1003	EICO	11-HETE	0.011624	nmol/mL	Negative	[M-H]-	319.2	167.2
1004	EICO	11-HETE	0.0206978	nmol/mL	Negative	[M-H]-	319.2	167.2
1005	EICO	11-HETE	0.00890091	nmol/mL	Negative	[M-H]-	319.2	167.2
1006	EICO	11-HETE	0.0163143	nmol/mL	Negative	[M-H]-	319.2	167.2
1007	EICO	11-HETE	0.00411068	nmol/mL	Negative	[M-H]-	319.2	167.2
1011	EICO	11-HETE	0.0133629	nmol/mL	Negative	[M-H]-	319.2	167.2
1012	EICO	11-HETE	0.0104503	nmol/mL	Negative	[M-H]-	319.2	167.2
1013	EICO	11-HETE	0.0153751	nmol/mL	Negative	[M-H]-	319.2	167.2
1015	EICO	11-HETE	0.00722885	nmol/mL	Negative	[M-H]-	319.2	167.2
1017	EICO	11-HETE	0.00473279	nmol/mL	Negative	[M-H]-	319.2	167.2
1018	EICO	11-HETE	0.172608	nmol/mL	Negative	[M-H]-	319.2	167.2
1019	EICO	11-HETE	0.0312355	nmol/mL	Negative	[M-H]-	319.2	167.2
1020	EICO	11-HETE	0.0137646	nmol/mL	Negative	[M-H]-	319.2	167.2
1022	EICO	11-HETE	0.0366384	nmol/mL	Negative	[M-H]-	319.2	167.2
1023	EICO	11-HETE	0.00250539	nmol/mL	Negative	[M-H]-	319.2	167.2
1024	EICO	11-HETE	0.0219022	nmol/mL	Negative	[M-H]-	319.2	167.2
1026	EICO	11-HETE	0.0366626	nmol/mL	Negative	[M-H]-	319.2	167.2
1027	EICO	11-HETE	0.0157771	nmol/mL	Negative	[M-H]-	319.2	167.2
1030	EICO	11-HETE	0.00937605	nmol/mL	Negative	[M-H]-	319.2	167.2
1031	EICO	11-HETE	0.0452801	nmol/mL	Negative	[M-H]-	319.2	167.2
1032	EICO	11-HETE	0.0169302	nmol/mL	Negative	[M-H]-	319.2	167.2
1033	EICO	11-HETE	0.00792742	nmol/mL	Negative	[M-H]-	319.2	167.2
1034	EICO	11-HETE	0.0266471	nmol/mL	Negative	[M-H]-	319.2	167.2
1035	EICO	11-HETE	0.0651013	nmol/mL	Negative	[M-H]-	319.2	167.2
1036	EICO	11-HETE	0.0335189	nmol/mL	Negative	[M-H]-	319.2	167.2
1037	EICO	11-HETE	0.013232	nmol/mL	Negative	[M-H]-	319.2	167.2
1040	EICO	11-HETE	0.013687	nmol/mL	Negative	[M-H]-	319.2	167.2
1042	EICO	11-HETE	0.0218404	nmol/mL	Negative	[M-H]-	319.2	167.2
1044	EICO	11-HETE	0.0194681	nmol/mL	Negative	[M-H]-	319.2	167.2
1045	EICO	11-HETE	0.00222666	nmol/mL	Negative	[M-H]-	319.2	167.2
1046	EICO	11-HETE	0.00407152	nmol/mL	Negative	[M-H]-	319.2	167.2
1047	EICO	11-HETE	0.00941312	nmol/mL	Negative	[M-H]-	319.2	167.2
1049	EICO	11-HETE	0.0057953	nmol/mL	Negative	[M-H]-	319.2	167.2
1051	EICO	11-HETE	0.00782139	nmol/mL	Negative	[M-H]-	319.2	167.2
1052	EICO	11-HETE	0.00986718	nmol/mL	Negative	[M-H]-	319.2	167.2
1053	EICO	11-HETE	0.012848	nmol/mL	Negative	[M-H]-	319.2	167.2
1056	EICO	11-HETE	0.0102073	nmol/mL	Negative	[M-H]-	319.2	167.2
1057	EICO	11-HETE	0.0148565	nmol/mL	Negative	[M-H]-	319.2	167.2
1061	EICO	11-HETE	0.0463267	nmol/mL	Negative	[M-H]-	319.2	167.2
2001	EICO	11-HETE	0.0243041	nmol/mL	Negative	[M-H]-	319.2	167.2
2004	EICO	11-HETE	0.0153797	nmol/mL	Negative	[M-H]-	319.2	167.2
2005	EICO	11-HETE	0.00788812	nmol/mL	Negative	[M-H]-	319.2	167.2
2008	EICO	11-HETE	0.00181818	nmol/mL	Negative	[M-H]-	319.2	167.2
2012	EICO	11-HETE	0.00636321	nmol/mL	Negative	[M-H]-	319.2	167.2
2013	EICO	11-HETE	0.0315088	nmol/mL	Negative	[M-H]-	319.2	167.2
2014	EICO	11-HETE	0.0324062	nmol/mL	Negative	[M-H]-	319.2	167.2
2015	EICO	11-HETE	0.0136986	nmol/mL	Negative	[M-H]-	319.2	167.2
2019	EICO	11-HETE	0.00986273	nmol/mL	Negative	[M-H]-	319.2	167.2
2020	EICO	11-HETE	0.0187377	nmol/mL	Negative	[M-H]-	319.2	167.2
2021	EICO	11-HETE	0.00514073	nmol/mL	Negative	[M-H]-	319.2	167.2
2022	EICO	11-HETE	0.00345351	nmol/mL	Negative	[M-H]-	319.2	167.2
2023	EICO	11-HETE	0.0404327	nmol/mL	Negative	[M-H]-	319.2	167.2
2023	EICO	11-HETE	0.0404327	nmol/mL	Negative	[M-H]-	319.2	167.2
2024	EICO	11-HETE	0.0106076	nmol/mL	Negative	[M-H]-	319.2	167.2
2025	EICO	11-HETE	0.00897451	nmol/mL	Negative	[M-H]-	319.2	167.2
2026	EICO	11-HETE	0.0238012	nmol/mL	Negative	[M-H]-	319.2	167.2
2027	EICO	11-HETE	0.00621385	nmol/mL	Negative	[M-H]-	319.2	167.2
2028	EICO	11-HETE	0.0177807	nmol/mL	Negative	[M-H]-	319.2	167.2
2029	EICO	11-HETE	0.0134275	nmol/mL	Negative	[M-H]-	319.2	167.2
2030	EICO	11-HETE	0.0234053	nmol/mL	Negative	[M-H]-	319.2	167.2
2031	EICO	11-HETE	0.00173169	nmol/mL	Negative	[M-H]-	319.2	167.2
2034	EICO	11-HETE	0.0270395	nmol/mL	Negative	[M-H]-	319.2	167.2
2035	EICO	11-HETE	0.00414546	nmol/mL	Negative	[M-H]-	319.2	167.2
2036	EICO	11-HETE	0.0083719	nmol/mL	Negative	[M-H]-	319.2	167.2
2037	EICO	11-HETE	0.0139757	nmol/mL	Negative	[M-H]-	319.2	167.2
2038	EICO	11-HETE	0.038357	nmol/mL	Negative	[M-H]-	319.2	167.2
2041	EICO	11-HETE	0.00471204	nmol/mL	Negative	[M-H]-	319.2	167.2
2044	EICO	11-HETE	0.0021525	nmol/mL	Negative	[M-H]-	319.2	167.2
2045	EICO	11-HETE	0.0028973	nmol/mL	Negative	[M-H]-	319.2	167.2
2047	EICO	11-HETE	0.00640886	nmol/mL	Negative	[M-H]-	319.2	167.2
2049	EICO	11-HETE	0.00998029	nmol/mL	Negative	[M-H]-	319.2	167.2
2051	EICO	11-HETE	0.00791448	nmol/mL	Negative	[M-H]-	319.2	167.2
2052	EICO	11-HETE	0.0151693	nmol/mL	Negative	[M-H]-	319.2	167.2
2054	EICO	11-HETE	0.00177699	nmol/mL	Negative	[M-H]-	319.2	167.2
2055	EICO	11-HETE	0.000940659	nmol/mL	Negative	[M-H]-	319.2	167.2
2056	EICO	11-HETE	0.0137344	nmol/mL	Negative	[M-H]-	319.2	167.2
2058	EICO	11-HETE	0.00539976	nmol/mL	Negative	[M-H]-	319.2	167.2
2060	EICO	11-HETE	0.00413939	nmol/mL	Negative	[M-H]-	319.2	167.2
2061	EICO	11-HETE	0.0201749	nmol/mL	Negative	[M-H]-	319.2	167.2
2064	EICO	11-HETE	0.0175151	nmol/mL	Negative	[M-H]-	319.2	167.2
3001	EICO	11-HETE	0.00572988	nmol/mL	Negative	[M-H]-	319.2	167.2
3002	EICO	11-HETE	0.00805688	nmol/mL	Negative	[M-H]-	319.2	167.2
3003	EICO	11-HETE	0.016437	nmol/mL	Negative	[M-H]-	319.2	167.2
3004	EICO	11-HETE	0.0265016	nmol/mL	Negative	[M-H]-	319.2	167.2
3005	EICO	11-HETE	0.0189248	nmol/mL	Negative	[M-H]-	319.2	167.2
3006	EICO	11-HETE	0.0372311	nmol/mL	Negative	[M-H]-	319.2	167.2
3007	EICO	11-HETE	0.00853751	nmol/mL	Negative	[M-H]-	319.2	167.2
3008	EICO	11-HETE	0.0479392	nmol/mL	Negative	[M-H]-	319.2	167.2
3009	EICO	11-HETE	0.0440509	nmol/mL	Negative	[M-H]-	319.2	167.2
3012	EICO	11-HETE	0.0107257	nmol/mL	Negative	[M-H]-	319.2	167.2
3014	EICO	11-HETE	0.0100628	nmol/mL	Negative	[M-H]-	319.2	167.2
3016	EICO	11-HETE	0.0219105	nmol/mL	Negative	[M-H]-	319.2	167.2
3018	EICO	11-HETE	0.0142127	nmol/mL	Negative	[M-H]-	319.2	167.2
3019	EICO	11-HETE	0.0293393	nmol/mL	Negative	[M-H]-	319.2	167.2
3021	EICO	11-HETE	0.0149464	nmol/mL	Negative	[M-H]-	319.2	167.2
3022	EICO	11-HETE	0.00404418	nmol/mL	Negative	[M-H]-	319.2	167.2
3024	EICO	11-HETE	0.0260025	nmol/mL	Negative	[M-H]-	319.2	167.2
3025	EICO	11-HETE	0.00357935	nmol/mL	Negative	[M-H]-	319.2	167.2
3026	EICO	11-HETE	0.0233208	nmol/mL	Negative	[M-H]-	319.2	167.2
3028	EICO	11-HETE	0.0226323	nmol/mL	Negative	[M-H]-	319.2	167.2
3029	EICO	11-HETE	0.00499407	nmol/mL	Negative	[M-H]-	319.2	167.2
3030	EICO	11-HETE	0.0347999	nmol/mL	Negative	[M-H]-	319.2	167.2
3031	EICO	11-HETE	0.00702446	nmol/mL	Negative	[M-H]-	319.2	167.2
3034	EICO	11-HETE	0.00169753	nmol/mL	Negative	[M-H]-	319.2	167.2
3035	EICO	11-HETE	0.0204917	nmol/mL	Negative	[M-H]-	319.2	167.2
3037	EICO	11-HETE	0.0126028	nmol/mL	Negative	[M-H]-	319.2	167.2
3039	EICO	11-HETE	0.0237608	nmol/mL	Negative	[M-H]-	319.2	167.2
3040	EICO	11-HETE	0.00196668	nmol/mL	Negative	[M-H]-	319.2	167.2
3042	EICO	11-HETE	0.00712956	nmol/mL	Negative	[M-H]-	319.2	167.2
3045	EICO	11-HETE	0.00429723	nmol/mL	Negative	[M-H]-	319.2	167.2
3046	EICO	11-HETE	0.00183573	nmol/mL	Negative	[M-H]-	319.2	167.2
3047	EICO	11-HETE	0.00794851	nmol/mL	Negative	[M-H]-	319.2	167.2
3049	EICO	11-HETE	0.0209427	nmol/mL	Negative	[M-H]-	319.2	167.2
3051	EICO	11-HETE	0.0101439	nmol/mL	Negative	[M-H]-	319.2	167.2
3055	EICO	11-HETE	0.0177247	nmol/mL	Negative	[M-H]-	319.2	167.2
3059	EICO	11-HETE	0.00109483	nmol/mL	Negative	[M-H]-	319.2	167.2
3060	EICO	11-HETE	0.0287979	nmol/mL	Negative	[M-H]-	319.2	167.2
3061	EICO	11-HETE	0.0149398	nmol/mL	Negative	[M-H]-	319.2	167.2
3064	EICO	11-HETE	0.0240332	nmol/mL	Negative	[M-H]-	319.2	167.2
3065	EICO	11-HETE	0.0193184	nmol/mL	Negative	[M-H]-	319.2	167.2
4002	EICO	11-HETE	0.00478791	nmol/mL	Negative	[M-H]-	319.2	167.2
4003	EICO	11-HETE	0.00253073	nmol/mL	Negative	[M-H]-	319.2	167.2
4004	EICO	11-HETE	0.0143445	nmol/mL	Negative	[M-H]-	319.2	167.2
4005	EICO	11-HETE	0.0998952	nmol/mL	Negative	[M-H]-	319.2	167.2
4007	EICO	11-HETE	0.00575633	nmol/mL	Negative	[M-H]-	319.2	167.2
4008	EICO	11-HETE	0.00446034	nmol/mL	Negative	[M-H]-	319.2	167.2
4009	EICO	11-HETE	0.00573564	nmol/mL	Negative	[M-H]-	319.2	167.2
4011	EICO	11-HETE	0.0115089	nmol/mL	Negative	[M-H]-	319.2	167.2
4012	EICO	11-HETE	0.0139402	nmol/mL	Negative	[M-H]-	319.2	167.2
4015	EICO	11-HETE	0.0100124	nmol/mL	Negative	[M-H]-	319.2	167.2
4017	EICO	11-HETE	0.00695598	nmol/mL	Negative	[M-H]-	319.2	167.2
4019	EICO	11-HETE	0.0125788	nmol/mL	Negative	[M-H]-	319.2	167.2
4022	EICO	11-HETE	0.00458854	nmol/mL	Negative	[M-H]-	319.2	167.2
4025	EICO	11-HETE	0.0040737	nmol/mL	Negative	[M-H]-	319.2	167.2
4026	EICO	11-HETE	0.002326	nmol/mL	Negative	[M-H]-	319.2	167.2
4027	EICO	11-HETE	0.0203808	nmol/mL	Negative	[M-H]-	319.2	167.2
4028	EICO	11-HETE	0.0128895	nmol/mL	Negative	[M-H]-	319.2	167.2
4030	EICO	11-HETE	0.00555469	nmol/mL	Negative	[M-H]-	319.2	167.2
4031	EICO	11-HETE	0.0124383	nmol/mL	Negative	[M-H]-	319.2	167.2
4032	EICO	11-HETE	0.00277532	nmol/mL	Negative	[M-H]-	319.2	167.2
4034	EICO	11-HETE	0.0082432	nmol/mL	Negative	[M-H]-	319.2	167.2
4035	EICO	11-HETE	0.014987	nmol/mL	Negative	[M-H]-	319.2	167.2
4037	EICO	11-HETE	0.00617139	nmol/mL	Negative	[M-H]-	319.2	167.2
4039	EICO	11-HETE	0.0115412	nmol/mL	Negative	[M-H]-	319.2	167.2
4040	EICO	11-HETE	0.032264	nmol/mL	Negative	[M-H]-	319.2	167.2
4041	EICO	11-HETE	0.016815	nmol/mL	Negative	[M-H]-	319.2	167.2
4042	EICO	11-HETE	0.0201793	nmol/mL	Negative	[M-H]-	319.2	167.2
4043	EICO	11-HETE	0.00133523	nmol/mL	Negative	[M-H]-	319.2	167.2
4045	EICO	11-HETE	0.0133011	nmol/mL	Negative	[M-H]-	319.2	167.2
4046	EICO	11-HETE	0.00501957	nmol/mL	Negative	[M-H]-	319.2	167.2
4047	EICO	11-HETE	0.0154384	nmol/mL	Negative	[M-H]-	319.2	167.2
4048	EICO	11-HETE	0.0314296	nmol/mL	Negative	[M-H]-	319.2	167.2
4049	EICO	11-HETE	0.0339848	nmol/mL	Negative	[M-H]-	319.2	167.2
4050	EICO	11-HETE	0.0026835	nmol/mL	Negative	[M-H]-	319.2	167.2
4052	EICO	11-HETE	0.0175682	nmol/mL	Negative	[M-H]-	319.2	167.2
4054	EICO	11-HETE	0.0039086	nmol/mL	Negative	[M-H]-	319.2	167.2
4055	EICO	11-HETE	0.0504395	nmol/mL	Negative	[M-H]-	319.2	167.2
4056	EICO	11-HETE	0.0310939	nmol/mL	Negative	[M-H]-	319.2	167.2
4057	EICO	11-HETE	0.0302085	nmol/mL	Negative	[M-H]-	319.2	167.2
4061	EICO	11-HETE	0.00872293	nmol/mL	Negative	[M-H]-	319.2	167.2
1001	EICO	12-HEPE	0.0033258	nmol/mL	Negative	[M-H]-	317.2	179
1003	EICO	12-HEPE	0.0300336	nmol/mL	Negative	[M-H]-	317.2	179
1004	EICO	12-HEPE	0.00634799	nmol/mL	Negative	[M-H]-	317.2	179
1005	EICO	12-HEPE	0.00391227	nmol/mL	Negative	[M-H]-	317.2	179
1006	EICO	12-HEPE	0.0158856	nmol/mL	Negative	[M-H]-	317.2	179
1007	EICO	12-HEPE	0.00584113	nmol/mL	Negative	[M-H]-	317.2	179
1011	EICO	12-HEPE	0.00641728	nmol/mL	Negative	[M-H]-	317.2	179
1012	EICO	12-HEPE	0.00236068	nmol/mL	Negative	[M-H]-	317.2	179
1013	EICO	12-HEPE	0.00725837	nmol/mL	Negative	[M-H]-	317.2	179
1015	EICO	12-HEPE	0.00208106	nmol/mL	Negative	[M-H]-	317.2	179
1017	EICO	12-HEPE	0.00565091	nmol/mL	Negative	[M-H]-	317.2	179
1018	EICO	12-HEPE	0.0497954	nmol/mL	Negative	[M-H]-	317.2	179
1019	EICO	12-HEPE	0.00778348	nmol/mL	Negative	[M-H]-	317.2	179
1020	EICO	12-HEPE	0.00512493	nmol/mL	Negative	[M-H]-	317.2	179
1022	EICO	12-HEPE	0.0111378	nmol/mL	Negative	[M-H]-	317.2	179
1023	EICO	12-HEPE	0.00704718	nmol/mL	Negative	[M-H]-	317.2	179
1024	EICO	12-HEPE	0.0151791	nmol/mL	Negative	[M-H]-	317.2	179
1026	EICO	12-HEPE	0.0306398	nmol/mL	Negative	[M-H]-	317.2	179
1027	EICO	12-HEPE	0.00654388	nmol/mL	Negative	[M-H]-	317.2	179
1030	EICO	12-HEPE	0.00251419	nmol/mL	Negative	[M-H]-	317.2	179
1031	EICO	12-HEPE	0.0153114	nmol/mL	Negative	[M-H]-	317.2	179
1032	EICO	12-HEPE	0.0059237	nmol/mL	Negative	[M-H]-	317.2	179
1033	EICO	12-HEPE	0.00129235	nmol/mL	Negative	[M-H]-	317.2	179
1034	EICO	12-HEPE	0.00735628	nmol/mL	Negative	[M-H]-	317.2	179
1035	EICO	12-HEPE	0.0242936	nmol/mL	Negative	[M-H]-	317.2	179
1036	EICO	12-HEPE	0.0708868	nmol/mL	Negative	[M-H]-	317.2	179
1037	EICO	12-HEPE	0.00717507	nmol/mL	Negative	[M-H]-	317.2	179
1040	EICO	12-HEPE	0.00391026	nmol/mL	Negative	[M-H]-	317.2	179
1042	EICO	12-HEPE	0.0891559	nmol/mL	Negative	[M-H]-	317.2	179
1044	EICO	12-HEPE	0.00716306	nmol/mL	Negative	[M-H]-	317.2	179
1045	EICO	12-HEPE	0.00426694	nmol/mL	Negative	[M-H]-	317.2	179
1046	EICO	12-HEPE	0.00290714	nmol/mL	Negative	[M-H]-	317.2	179
1047	EICO	12-HEPE	0.00400266	nmol/mL	Negative	[M-H]-	317.2	179
1049	EICO	12-HEPE	0.00204237	nmol/mL	Negative	[M-H]-	317.2	179
1051	EICO	12-HEPE	0.00241625	nmol/mL	Negative	[M-H]-	317.2	179
1052	EICO	12-HEPE	0.00140363	nmol/mL	Negative	[M-H]-	317.2	179
1053	EICO	12-HEPE	0.00779297	nmol/mL	Negative	[M-H]-	317.2	179
1056	EICO	12-HEPE	0.00906874	nmol/mL	Negative	[M-H]-	317.2	179
1057	EICO	12-HEPE	0.00552134	nmol/mL	Negative	[M-H]-	317.2	179
1061	EICO	12-HEPE	0.0275821	nmol/mL	Negative	[M-H]-	317.2	179
2001	EICO	12-HEPE	0.014424	nmol/mL	Negative	[M-H]-	317.2	179
2004	EICO	12-HEPE	0.00141812	nmol/mL	Negative	[M-H]-	317.2	179
2005	EICO	12-HEPE	0.00234454	nmol/mL	Negative	[M-H]-	317.2	179
2008	EICO	12-HEPE	0.000929992	nmol/mL	Negative	[M-H]-	317.2	179
2012	EICO	12-HEPE	0.00353759	nmol/mL	Negative	[M-H]-	317.2	179
2013	EICO	12-HEPE	0.0161312	nmol/mL	Negative	[M-H]-	317.2	179
2014	EICO	12-HEPE	0.00942372	nmol/mL	Negative	[M-H]-	317.2	179
2015	EICO	12-HEPE	0.00705018	nmol/mL	Negative	[M-H]-	317.2	179
2019	EICO	12-HEPE	0.00492674	nmol/mL	Negative	[M-H]-	317.2	179
2020	EICO	12-HEPE	0.016981	nmol/mL	Negative	[M-H]-	317.2	179
2021	EICO	12-HEPE	0.00160269	nmol/mL	Negative	[M-H]-	317.2	179
2022	EICO	12-HEPE	0.00319578	nmol/mL	Negative	[M-H]-	317.2	179
2023	EICO	12-HEPE	0.00873237	nmol/mL	Negative	[M-H]-	317.2	179
2023	EICO	12-HEPE	0.00873237	nmol/mL	Negative	[M-H]-	317.2	179
2024	EICO	12-HEPE	0.0045268	nmol/mL	Negative	[M-H]-	317.2	179
2025	EICO	12-HEPE	0.00281829	nmol/mL	Negative	[M-H]-	317.2	179
2026	EICO	12-HEPE	0.00649399	nmol/mL	Negative	[M-H]-	317.2	179
2027	EICO	12-HEPE	0.00284722	nmol/mL	Negative	[M-H]-	317.2	179
2028	EICO	12-HEPE	0.00543297	nmol/mL	Negative	[M-H]-	317.2	179
2029	EICO	12-HEPE	0.0167487	nmol/mL	Negative	[M-H]-	317.2	179
2030	EICO	12-HEPE	0.00828348	nmol/mL	Negative	[M-H]-	317.2	179
2031	EICO	12-HEPE	0.0119742	nmol/mL	Negative	[M-H]-	317.2	179
2034	EICO	12-HEPE	0.0081867	nmol/mL	Negative	[M-H]-	317.2	179
2035	EICO	12-HEPE	0.00330457	nmol/mL	Negative	[M-H]-	317.2	179
2036	EICO	12-HEPE	0.0100876	nmol/mL	Negative	[M-H]-	317.2	179
2037	EICO	12-HEPE	0.00348912	nmol/mL	Negative	[M-H]-	317.2	179
2038	EICO	12-HEPE	0.0173602	nmol/mL	Negative	[M-H]-	317.2	179
2041	EICO	12-HEPE	0.00125761	nmol/mL	Negative	[M-H]-	317.2	179
2044	EICO	12-HEPE	0.000996009	nmol/mL	Negative	[M-H]-	317.2	179
2045	EICO	12-HEPE	0.00658675	nmol/mL	Negative	[M-H]-	317.2	179
2047	EICO	12-HEPE	0.00234852	nmol/mL	Negative	[M-H]-	317.2	179
2049	EICO	12-HEPE	0.00235196	nmol/mL	Negative	[M-H]-	317.2	179
2051	EICO	12-HEPE	0.00598555	nmol/mL	Negative	[M-H]-	317.2	179
2052	EICO	12-HEPE	0.005575	nmol/mL	Negative	[M-H]-	317.2	179
2054	EICO	12-HEPE	0.00303534	nmol/mL	Negative	[M-H]-	317.2	179
2055	EICO	12-HEPE	0.0017892	nmol/mL	Negative	[M-H]-	317.2	179
2056	EICO	12-HEPE	0.00393075	nmol/mL	Negative	[M-H]-	317.2	179
2058	EICO	12-HEPE	0.00187382	nmol/mL	Negative	[M-H]-	317.2	179
2060	EICO	12-HEPE	0.00424679	nmol/mL	Negative	[M-H]-	317.2	179
2061	EICO	12-HEPE	0.0439699	nmol/mL	Negative	[M-H]-	317.2	179
2064	EICO	12-HEPE	0.00443666	nmol/mL	Negative	[M-H]-	317.2	179
3001	EICO	12-HEPE	0.00148277	nmol/mL	Negative	[M-H]-	317.2	179
3002	EICO	12-HEPE	0.00889991	nmol/mL	Negative	[M-H]-	317.2	179
3003	EICO	12-HEPE	0.0234348	nmol/mL	Negative	[M-H]-	317.2	179
3004	EICO	12-HEPE	0.0156062	nmol/mL	Negative	[M-H]-	317.2	179
3005	EICO	12-HEPE	0.00661665	nmol/mL	Negative	[M-H]-	317.2	179
3006	EICO	12-HEPE	0.0192178	nmol/mL	Negative	[M-H]-	317.2	179
3007	EICO	12-HEPE	0.00335946	nmol/mL	Negative	[M-H]-	317.2	179
3008	EICO	12-HEPE	0.0228038	nmol/mL	Negative	[M-H]-	317.2	179
3009	EICO	12-HEPE	0.00823746	nmol/mL	Negative	[M-H]-	317.2	179
3012	EICO	12-HEPE	0.00259138	nmol/mL	Negative	[M-H]-	317.2	179
3014	EICO	12-HEPE	0.00377903	nmol/mL	Negative	[M-H]-	317.2	179
3016	EICO	12-HEPE	0.00918281	nmol/mL	Negative	[M-H]-	317.2	179
3018	EICO	12-HEPE	0.00748437	nmol/mL	Negative	[M-H]-	317.2	179
3019	EICO	12-HEPE	0.0192394	nmol/mL	Negative	[M-H]-	317.2	179
3021	EICO	12-HEPE	0.01463	nmol/mL	Negative	[M-H]-	317.2	179
3022	EICO	12-HEPE	0.0126576	nmol/mL	Negative	[M-H]-	317.2	179
3024	EICO	12-HEPE	0.00676889	nmol/mL	Negative	[M-H]-	317.2	179
3025	EICO	12-HEPE	0.00165165	nmol/mL	Negative	[M-H]-	317.2	179
3026	EICO	12-HEPE	0.0253051	nmol/mL	Negative	[M-H]-	317.2	179
3028	EICO	12-HEPE	0.00743018	nmol/mL	Negative	[M-H]-	317.2	179
3029	EICO	12-HEPE	0.000118228	nmol/mL	Negative	[M-H]-	317.2	179
3030	EICO	12-HEPE	0.0106319	nmol/mL	Negative	[M-H]-	317.2	179
3031	EICO	12-HEPE	0.005463	nmol/mL	Negative	[M-H]-	317.2	179
3034	EICO	12-HEPE	0.00127431	nmol/mL	Negative	[M-H]-	317.2	179
3035	EICO	12-HEPE	0.0103623	nmol/mL	Negative	[M-H]-	317.2	179
3037	EICO	12-HEPE	0.00345459	nmol/mL	Negative	[M-H]-	317.2	179
3039	EICO	12-HEPE	0.00576056	nmol/mL	Negative	[M-H]-	317.2	179
3040	EICO	12-HEPE	0.00358573	nmol/mL	Negative	[M-H]-	317.2	179
3042	EICO	12-HEPE	0.00292358	nmol/mL	Negative	[M-H]-	317.2	179
3045	EICO	12-HEPE	0.00148426	nmol/mL	Negative	[M-H]-	317.2	179
3046	EICO	12-HEPE	0.0002193	nmol/mL	Negative	[M-H]-	317.2	179
3047	EICO	12-HEPE	0.00238102	nmol/mL	Negative	[M-H]-	317.2	179
3049	EICO	12-HEPE	0.0120749	nmol/mL	Negative	[M-H]-	317.2	179
3051	EICO	12-HEPE	0.00173865	nmol/mL	Negative	[M-H]-	317.2	179
3055	EICO	12-HEPE	0.0115534	nmol/mL	Negative	[M-H]-	317.2	179
3059	EICO	12-HEPE	0.000736189	nmol/mL	Negative	[M-H]-	317.2	179
3060	EICO	12-HEPE	0.00477816	nmol/mL	Negative	[M-H]-	317.2	179
3061	EICO	12-HEPE	0.00629471	nmol/mL	Negative	[M-H]-	317.2	179
3064	EICO	12-HEPE	0.00891523	nmol/mL	Negative	[M-H]-	317.2	179
3065	EICO	12-HEPE	0.00688764	nmol/mL	Negative	[M-H]-	317.2	179
4002	EICO	12-HEPE	0.00346729	nmol/mL	Negative	[M-H]-	317.2	179
4003	EICO	12-HEPE	0.00308026	nmol/mL	Negative	[M-H]-	317.2	179
4004	EICO	12-HEPE	0.0044849	nmol/mL	Negative	[M-H]-	317.2	179
4005	EICO	12-HEPE	0.21147	nmol/mL	Negative	[M-H]-	317.2	179
4007	EICO	12-HEPE	0.00128413	nmol/mL	Negative	[M-H]-	317.2	179
4008	EICO	12-HEPE	0.00167145	nmol/mL	Negative	[M-H]-	317.2	179
4009	EICO	12-HEPE	0.0143097	nmol/mL	Negative	[M-H]-	317.2	179
4011	EICO	12-HEPE	0.00307248	nmol/mL	Negative	[M-H]-	317.2	179
4012	EICO	12-HEPE	0.00456966	nmol/mL	Negative	[M-H]-	317.2	179
4015	EICO	12-HEPE	0.00343621	nmol/mL	Negative	[M-H]-	317.2	179
4017	EICO	12-HEPE	0.00104345	nmol/mL	Negative	[M-H]-	317.2	179
4019	EICO	12-HEPE	0.0123574	nmol/mL	Negative	[M-H]-	317.2	179
4022	EICO	12-HEPE	0.00199281	nmol/mL	Negative	[M-H]-	317.2	179
4025	EICO	12-HEPE	0.00258016	nmol/mL	Negative	[M-H]-	317.2	179
4026	EICO	12-HEPE	0.000481097	nmol/mL	Negative	[M-H]-	317.2	179
4027	EICO	12-HEPE	0.00393595	nmol/mL	Negative	[M-H]-	317.2	179
4028	EICO	12-HEPE	0.00434469	nmol/mL	Negative	[M-H]-	317.2	179
4030	EICO	12-HEPE	0.000883167	nmol/mL	Negative	[M-H]-	317.2	179
4031	EICO	12-HEPE	0.00356364	nmol/mL	Negative	[M-H]-	317.2	179
4032	EICO	12-HEPE	0.00599389	nmol/mL	Negative	[M-H]-	317.2	179
4034	EICO	12-HEPE	0.00370913	nmol/mL	Negative	[M-H]-	317.2	179
4035	EICO	12-HEPE	0.00450404	nmol/mL	Negative	[M-H]-	317.2	179
4037	EICO	12-HEPE	0.0024602	nmol/mL	Negative	[M-H]-	317.2	179
4039	EICO	12-HEPE	0.00223855	nmol/mL	Negative	[M-H]-	317.2	179
4040	EICO	12-HEPE	0.0252884	nmol/mL	Negative	[M-H]-	317.2	179
4041	EICO	12-HEPE	0.00356109	nmol/mL	Negative	[M-H]-	317.2	179
4042	EICO	12-HEPE	0.0225615	nmol/mL	Negative	[M-H]-	317.2	179
4043	EICO	12-HEPE	0.00272802	nmol/mL	Negative	[M-H]-	317.2	179
4045	EICO	12-HEPE	0.0122729	nmol/mL	Negative	[M-H]-	317.2	179
4046	EICO	12-HEPE	0.0119991	nmol/mL	Negative	[M-H]-	317.2	179
4047	EICO	12-HEPE	0.00576249	nmol/mL	Negative	[M-H]-	317.2	179
4048	EICO	12-HEPE	0.00842925	nmol/mL	Negative	[M-H]-	317.2	179
4049	EICO	12-HEPE	0.0159144	nmol/mL	Negative	[M-H]-	317.2	179
4050	EICO	12-HEPE	0.00109808	nmol/mL	Negative	[M-H]-	317.2	179
4052	EICO	12-HEPE	0.00700934	nmol/mL	Negative	[M-H]-	317.2	179
4054	EICO	12-HEPE	0.00193669	nmol/mL	Negative	[M-H]-	317.2	179
4055	EICO	12-HEPE	0.0471919	nmol/mL	Negative	[M-H]-	317.2	179
4056	EICO	12-HEPE	0.0158648	nmol/mL	Negative	[M-H]-	317.2	179
4057	EICO	12-HEPE	0.0197142	nmol/mL	Negative	[M-H]-	317.2	179
4061	EICO	12-HEPE	0.00544729	nmol/mL	Negative	[M-H]-	317.2	179
1001	EICO	12-HETE	0.0546994	nmol/mL	Negative	[M-H]-	319.2	179.2
1003	EICO	12-HETE	0.420015	nmol/mL	Negative	[M-H]-	319.2	179.2
1004	EICO	12-HETE	0.336943	nmol/mL	Negative	[M-H]-	319.2	179.2
1005	EICO	12-HETE	0.0758176	nmol/mL	Negative	[M-H]-	319.2	179.2
1006	EICO	12-HETE	0.187668	nmol/mL	Negative	[M-H]-	319.2	179.2
1007	EICO	12-HETE	0.269532	nmol/mL	Negative	[M-H]-	319.2	179.2
1011	EICO	12-HETE	0.176907	nmol/mL	Negative	[M-H]-	319.2	179.2
1012	EICO	12-HETE	0.0980132	nmol/mL	Negative	[M-H]-	319.2	179.2
1013	EICO	12-HETE	0.102983	nmol/mL	Negative	[M-H]-	319.2	179.2
1015	EICO	12-HETE	0.125224	nmol/mL	Negative	[M-H]-	319.2	179.2
1017	EICO	12-HETE	0.123814	nmol/mL	Negative	[M-H]-	319.2	179.2
1018	EICO	12-HETE	2.32149	nmol/mL	Negative	[M-H]-	319.2	179.2
1019	EICO	12-HETE	0.355987	nmol/mL	Negative	[M-H]-	319.2	179.2
1020	EICO	12-HETE	0.163289	nmol/mL	Negative	[M-H]-	319.2	179.2
1022	EICO	12-HETE	0.433272	nmol/mL	Negative	[M-H]-	319.2	179.2
1023	EICO	12-HETE	0.117582	nmol/mL	Negative	[M-H]-	319.2	179.2
1024	EICO	12-HETE	0.449875	nmol/mL	Negative	[M-H]-	319.2	179.2
1026	EICO	12-HETE	0.742424	nmol/mL	Negative	[M-H]-	319.2	179.2
1027	EICO	12-HETE	0.138764	nmol/mL	Negative	[M-H]-	319.2	179.2
1030	EICO	12-HETE	0.0913979	nmol/mL	Negative	[M-H]-	319.2	179.2
1031	EICO	12-HETE	0.481057	nmol/mL	Negative	[M-H]-	319.2	179.2
1032	EICO	12-HETE	0.340839	nmol/mL	Negative	[M-H]-	319.2	179.2
1033	EICO	12-HETE	0.0391983	nmol/mL	Negative	[M-H]-	319.2	179.2
1034	EICO	12-HETE	0.182545	nmol/mL	Negative	[M-H]-	319.2	179.2
1035	EICO	12-HETE	0.875999	nmol/mL	Negative	[M-H]-	319.2	179.2
1036	EICO	12-HETE	0.698536	nmol/mL	Negative	[M-H]-	319.2	179.2
1037	EICO	12-HETE	0.225876	nmol/mL	Negative	[M-H]-	319.2	179.2
1040	EICO	12-HETE	0.103515	nmol/mL	Negative	[M-H]-	319.2	179.2
1042	EICO	12-HETE	0.906352	nmol/mL	Negative	[M-H]-	319.2	179.2
1044	EICO	12-HETE	0.223116	nmol/mL	Negative	[M-H]-	319.2	179.2
1045	EICO	12-HETE	0.0964547	nmol/mL	Negative	[M-H]-	319.2	179.2
1046	EICO	12-HETE	0.0459461	nmol/mL	Negative	[M-H]-	319.2	179.2
1047	EICO	12-HETE	0.0945469	nmol/mL	Negative	[M-H]-	319.2	179.2
1049	EICO	12-HETE	0.0942144	nmol/mL	Negative	[M-H]-	319.2	179.2
1051	EICO	12-HETE	0.0518804	nmol/mL	Negative	[M-H]-	319.2	179.2
1052	EICO	12-HETE	0.0712074	nmol/mL	Negative	[M-H]-	319.2	179.2
1053	EICO	12-HETE	0.104475	nmol/mL	Negative	[M-H]-	319.2	179.2
1056	EICO	12-HETE	0.0742778	nmol/mL	Negative	[M-H]-	319.2	179.2
1057	EICO	12-HETE	0.159133	nmol/mL	Negative	[M-H]-	319.2	179.2
1061	EICO	12-HETE	0.909946	nmol/mL	Negative	[M-H]-	319.2	179.2
2001	EICO	12-HETE	0.288282	nmol/mL	Negative	[M-H]-	319.2	179.2
2004	EICO	12-HETE	0.0710709	nmol/mL	Negative	[M-H]-	319.2	179.2
2005	EICO	12-HETE	0.0908654	nmol/mL	Negative	[M-H]-	319.2	179.2
2008	EICO	12-HETE	0.0198116	nmol/mL	Negative	[M-H]-	319.2	179.2
2012	EICO	12-HETE	0.0783445	nmol/mL	Negative	[M-H]-	319.2	179.2
2013	EICO	12-HETE	0.178957	nmol/mL	Negative	[M-H]-	319.2	179.2
2014	EICO	12-HETE	0.429727	nmol/mL	Negative	[M-H]-	319.2	179.2
2015	EICO	12-HETE	0.29185	nmol/mL	Negative	[M-H]-	319.2	179.2
2019	EICO	12-HETE	0.101875	nmol/mL	Negative	[M-H]-	319.2	179.2
2020	EICO	12-HETE	0.127492	nmol/mL	Negative	[M-H]-	319.2	179.2
2021	EICO	12-HETE	0.0609598	nmol/mL	Negative	[M-H]-	319.2	179.2
2022	EICO	12-HETE	0.0424565	nmol/mL	Negative	[M-H]-	319.2	179.2
2023	EICO	12-HETE	0.396574	nmol/mL	Negative	[M-H]-	319.2	179.2
2023	EICO	12-HETE	0.396574	nmol/mL	Negative	[M-H]-	319.2	179.2
2024	EICO	12-HETE	0.130605	nmol/mL	Negative	[M-H]-	319.2	179.2
2025	EICO	12-HETE	0.107949	nmol/mL	Negative	[M-H]-	319.2	179.2
2026	EICO	12-HETE	0.319388	nmol/mL	Negative	[M-H]-	319.2	179.2
2027	EICO	12-HETE	0.0567659	nmol/mL	Negative	[M-H]-	319.2	179.2
2028	EICO	12-HETE	0.225766	nmol/mL	Negative	[M-H]-	319.2	179.2
2029	EICO	12-HETE	0.151525	nmol/mL	Negative	[M-H]-	319.2	179.2
2030	EICO	12-HETE	0.181433	nmol/mL	Negative	[M-H]-	319.2	179.2
2031	EICO	12-HETE	0.085672	nmol/mL	Negative	[M-H]-	319.2	179.2
2034	EICO	12-HETE	0.212425	nmol/mL	Negative	[M-H]-	319.2	179.2
2035	EICO	12-HETE	0.0159131	nmol/mL	Negative	[M-H]-	319.2	179.2
2036	EICO	12-HETE	0.118953	nmol/mL	Negative	[M-H]-	319.2	179.2
2037	EICO	12-HETE	0.091876	nmol/mL	Negative	[M-H]-	319.2	179.2
2038	EICO	12-HETE	0.309173	nmol/mL	Negative	[M-H]-	319.2	179.2
2041	EICO	12-HETE	0.031608	nmol/mL	Negative	[M-H]-	319.2	179.2
2044	EICO	12-HETE	0.0300415	nmol/mL	Negative	[M-H]-	319.2	179.2
2045	EICO	12-HETE	0.0661888	nmol/mL	Negative	[M-H]-	319.2	179.2
2047	EICO	12-HETE	0.0449127	nmol/mL	Negative	[M-H]-	319.2	179.2
2049	EICO	12-HETE	0.0929681	nmol/mL	Negative	[M-H]-	319.2	179.2
2051	EICO	12-HETE	0.160268	nmol/mL	Negative	[M-H]-	319.2	179.2
2052	EICO	12-HETE	0.154019	nmol/mL	Negative	[M-H]-	319.2	179.2
2054	EICO	12-HETE	0.0614858	nmol/mL	Negative	[M-H]-	319.2	179.2
2055	EICO	12-HETE	0.0483467	nmol/mL	Negative	[M-H]-	319.2	179.2
2056	EICO	12-HETE	0.129701	nmol/mL	Negative	[M-H]-	319.2	179.2
2058	EICO	12-HETE	0.0674165	nmol/mL	Negative	[M-H]-	319.2	179.2
2060	EICO	12-HETE	0.0251529	nmol/mL	Negative	[M-H]-	319.2	179.2
2061	EICO	12-HETE	0.358359	nmol/mL	Negative	[M-H]-	319.2	179.2
2064	EICO	12-HETE	0.285859	nmol/mL	Negative	[M-H]-	319.2	179.2
3001	EICO	12-HETE	0.0581747	nmol/mL	Negative	[M-H]-	319.2	179.2
3002	EICO	12-HETE	0.172399	nmol/mL	Negative	[M-H]-	319.2	179.2
3003	EICO	12-HETE	0.157631	nmol/mL	Negative	[M-H]-	319.2	179.2
3004	EICO	12-HETE	0.207955	nmol/mL	Negative	[M-H]-	319.2	179.2
3005	EICO	12-HETE	0.119901	nmol/mL	Negative	[M-H]-	319.2	179.2
3006	EICO	12-HETE	0.298457	nmol/mL	Negative	[M-H]-	319.2	179.2
3007	EICO	12-HETE	0.135189	nmol/mL	Negative	[M-H]-	319.2	179.2
3008	EICO	12-HETE	0.502665	nmol/mL	Negative	[M-H]-	319.2	179.2
3009	EICO	12-HETE	0.595537	nmol/mL	Negative	[M-H]-	319.2	179.2
3012	EICO	12-HETE	0.091635	nmol/mL	Negative	[M-H]-	319.2	179.2
3014	EICO	12-HETE	0.113753	nmol/mL	Negative	[M-H]-	319.2	179.2
3016	EICO	12-HETE	0.161449	nmol/mL	Negative	[M-H]-	319.2	179.2
3018	EICO	12-HETE	0.193358	nmol/mL	Negative	[M-H]-	319.2	179.2
3019	EICO	12-HETE	0.332528	nmol/mL	Negative	[M-H]-	319.2	179.2
3021	EICO	12-HETE	0.160909	nmol/mL	Negative	[M-H]-	319.2	179.2
3022	EICO	12-HETE	0.10009	nmol/mL	Negative	[M-H]-	319.2	179.2
3024	EICO	12-HETE	0.313801	nmol/mL	Negative	[M-H]-	319.2	179.2
3025	EICO	12-HETE	0.037081	nmol/mL	Negative	[M-H]-	319.2	179.2
3026	EICO	12-HETE	0.396129	nmol/mL	Negative	[M-H]-	319.2	179.2
3028	EICO	12-HETE	0.172002	nmol/mL	Negative	[M-H]-	319.2	179.2
3029	EICO	12-HETE	0.0105608	nmol/mL	Negative	[M-H]-	319.2	179.2
3030	EICO	12-HETE	0.41705	nmol/mL	Negative	[M-H]-	319.2	179.2
3031	EICO	12-HETE	0.108631	nmol/mL	Negative	[M-H]-	319.2	179.2
3034	EICO	12-HETE	0.0368572	nmol/mL	Negative	[M-H]-	319.2	179.2
3035	EICO	12-HETE	0.472014	nmol/mL	Negative	[M-H]-	319.2	179.2
3037	EICO	12-HETE	0.124703	nmol/mL	Negative	[M-H]-	319.2	179.2
3039	EICO	12-HETE	0.26029	nmol/mL	Negative	[M-H]-	319.2	179.2
3040	EICO	12-HETE	0.0908017	nmol/mL	Negative	[M-H]-	319.2	179.2
3042	EICO	12-HETE	0.0565503	nmol/mL	Negative	[M-H]-	319.2	179.2
3045	EICO	12-HETE	0.0344708	nmol/mL	Negative	[M-H]-	319.2	179.2
3046	EICO	12-HETE	0.00471891	nmol/mL	Negative	[M-H]-	319.2	179.2
3047	EICO	12-HETE	0.038125	nmol/mL	Negative	[M-H]-	319.2	179.2
3049	EICO	12-HETE	0.202127	nmol/mL	Negative	[M-H]-	319.2	179.2
3051	EICO	12-HETE	0.105835	nmol/mL	Negative	[M-H]-	319.2	179.2
3055	EICO	12-HETE	0.364155	nmol/mL	Negative	[M-H]-	319.2	179.2
3059	EICO	12-HETE	0.0230641	nmol/mL	Negative	[M-H]-	319.2	179.2
3060	EICO	12-HETE	0.119863	nmol/mL	Negative	[M-H]-	319.2	179.2
3061	EICO	12-HETE	0.481892	nmol/mL	Negative	[M-H]-	319.2	179.2
3064	EICO	12-HETE	0.376062	nmol/mL	Negative	[M-H]-	319.2	179.2
3065	EICO	12-HETE	0.21055	nmol/mL	Negative	[M-H]-	319.2	179.2
4002	EICO	12-HETE	0.0631343	nmol/mL	Negative	[M-H]-	319.2	179.2
4003	EICO	12-HETE	0.0682918	nmol/mL	Negative	[M-H]-	319.2	179.2
4004	EICO	12-HETE	0.12785	nmol/mL	Negative	[M-H]-	319.2	179.2
4005	EICO	12-HETE	1.34837	nmol/mL	Negative	[M-H]-	319.2	179.2
4007	EICO	12-HETE	0.0417571	nmol/mL	Negative	[M-H]-	319.2	179.2
4008	EICO	12-HETE	0.0196829	nmol/mL	Negative	[M-H]-	319.2	179.2
4009	EICO	12-HETE	0.348435	nmol/mL	Negative	[M-H]-	319.2	179.2
4011	EICO	12-HETE	0.125086	nmol/mL	Negative	[M-H]-	319.2	179.2
4012	EICO	12-HETE	0.102613	nmol/mL	Negative	[M-H]-	319.2	179.2
4015	EICO	12-HETE	0.0950993	nmol/mL	Negative	[M-H]-	319.2	179.2
4017	EICO	12-HETE	0.0157288	nmol/mL	Negative	[M-H]-	319.2	179.2
4019	EICO	12-HETE	0.16985	nmol/mL	Negative	[M-H]-	319.2	179.2
4022	EICO	12-HETE	0.0250636	nmol/mL	Negative	[M-H]-	319.2	179.2
4025	EICO	12-HETE	0.0335459	nmol/mL	Negative	[M-H]-	319.2	179.2
4026	EICO	12-HETE	0.00875563	nmol/mL	Negative	[M-H]-	319.2	179.2
4027	EICO	12-HETE	0.205772	nmol/mL	Negative	[M-H]-	319.2	179.2
4028	EICO	12-HETE	0.108386	nmol/mL	Negative	[M-H]-	319.2	179.2
4030	EICO	12-HETE	0.0171277	nmol/mL	Negative	[M-H]-	319.2	179.2
4031	EICO	12-HETE	0.159912	nmol/mL	Negative	[M-H]-	319.2	179.2
4032	EICO	12-HETE	0.0822143	nmol/mL	Negative	[M-H]-	319.2	179.2
4034	EICO	12-HETE	0.0978982	nmol/mL	Negative	[M-H]-	319.2	179.2
4035	EICO	12-HETE	0.123123	nmol/mL	Negative	[M-H]-	319.2	179.2
4037	EICO	12-HETE	0.0362499	nmol/mL	Negative	[M-H]-	319.2	179.2
4039	EICO	12-HETE	0.067538	nmol/mL	Negative	[M-H]-	319.2	179.2
4040	EICO	12-HETE	0.335107	nmol/mL	Negative	[M-H]-	319.2	179.2
4041	EICO	12-HETE	0.124304	nmol/mL	Negative	[M-H]-	319.2	179.2
4042	EICO	12-HETE	0.205511	nmol/mL	Negative	[M-H]-	319.2	179.2
4043	EICO	12-HETE	0.0232285	nmol/mL	Negative	[M-H]-	319.2	179.2
4045	EICO	12-HETE	0.403383	nmol/mL	Negative	[M-H]-	319.2	179.2
4046	EICO	12-HETE	0.0558124	nmol/mL	Negative	[M-H]-	319.2	179.2
4047	EICO	12-HETE	0.0691988	nmol/mL	Negative	[M-H]-	319.2	179.2
4048	EICO	12-HETE	0.243665	nmol/mL	Negative	[M-H]-	319.2	179.2
4049	EICO	12-HETE	0.367919	nmol/mL	Negative	[M-H]-	319.2	179.2
4050	EICO	12-HETE	0.0395479	nmol/mL	Negative	[M-H]-	319.2	179.2
4052	EICO	12-HETE	0.195241	nmol/mL	Negative	[M-H]-	319.2	179.2
4054	EICO	12-HETE	0.0817599	nmol/mL	Negative	[M-H]-	319.2	179.2
4055	EICO	12-HETE	0.60908	nmol/mL	Negative	[M-H]-	319.2	179.2
4056	EICO	12-HETE	0.40515	nmol/mL	Negative	[M-H]-	319.2	179.2
4057	EICO	12-HETE	0.481264	nmol/mL	Negative	[M-H]-	319.2	179.2
4061	EICO	12-HETE	0.107218	nmol/mL	Negative	[M-H]-	319.2	179.2
1001	EICO	13-HODE	0.016843	nmol/mL	Negative	[M-H]-	295.2	195.5
1003	EICO	13-HODE	0.0216085	nmol/mL	Negative	[M-H]-	295.2	195.5
1004	EICO	13-HODE	0.00850419	nmol/mL	Negative	[M-H]-	295.2	195.5
1005	EICO	13-HODE	0.0275648	nmol/mL	Negative	[M-H]-	295.2	195.5
1006	EICO	13-HODE	0.0342337	nmol/mL	Negative	[M-H]-	295.2	195.5
1007	EICO	13-HODE	0.00922483	nmol/mL	Negative	[M-H]-	295.2	195.5
1011	EICO	13-HODE	0.0387563	nmol/mL	Negative	[M-H]-	295.2	195.5
1012	EICO	13-HODE	0.0176689	nmol/mL	Negative	[M-H]-	295.2	195.5
1013	EICO	13-HODE	0.0223117	nmol/mL	Negative	[M-H]-	295.2	195.5
1015	EICO	13-HODE	0.0129875	nmol/mL	Negative	[M-H]-	295.2	195.5
1017	EICO	13-HODE	0.0381628	nmol/mL	Negative	[M-H]-	295.2	195.5
1018	EICO	13-HODE	0.0364955	nmol/mL	Negative	[M-H]-	295.2	195.5
1019	EICO	13-HODE	0.0244656	nmol/mL	Negative	[M-H]-	295.2	195.5
1020	EICO	13-HODE	0.0429356	nmol/mL	Negative	[M-H]-	295.2	195.5
1022	EICO	13-HODE	0.0183849	nmol/mL	Negative	[M-H]-	295.2	195.5
1023	EICO	13-HODE	0.0101893	nmol/mL	Negative	[M-H]-	295.2	195.5
1024	EICO	13-HODE	0.0118639	nmol/mL	Negative	[M-H]-	295.2	195.5
1026	EICO	13-HODE	0.0135284	nmol/mL	Negative	[M-H]-	295.2	195.5
1027	EICO	13-HODE	0.0212005	nmol/mL	Negative	[M-H]-	295.2	195.5
1030	EICO	13-HODE	0.0116399	nmol/mL	Negative	[M-H]-	295.2	195.5
1031	EICO	13-HODE	0.0218255	nmol/mL	Negative	[M-H]-	295.2	195.5
1032	EICO	13-HODE	0.0222091	nmol/mL	Negative	[M-H]-	295.2	195.5
1033	EICO	13-HODE	0.0135959	nmol/mL	Negative	[M-H]-	295.2	195.5
1034	EICO	13-HODE	0.0439469	nmol/mL	Negative	[M-H]-	295.2	195.5
1035	EICO	13-HODE	0.0243539	nmol/mL	Negative	[M-H]-	295.2	195.5
1036	EICO	13-HODE	0.0301283	nmol/mL	Negative	[M-H]-	295.2	195.5
1037	EICO	13-HODE	0.014644	nmol/mL	Negative	[M-H]-	295.2	195.5
1040	EICO	13-HODE	0.0145882	nmol/mL	Negative	[M-H]-	295.2	195.5
1042	EICO	13-HODE	0.0208191	nmol/mL	Negative	[M-H]-	295.2	195.5
1044	EICO	13-HODE	0.017888	nmol/mL	Negative	[M-H]-	295.2	195.5
1045	EICO	13-HODE	0.0267577	nmol/mL	Negative	[M-H]-	295.2	195.5
1046	EICO	13-HODE	0.0344486	nmol/mL	Negative	[M-H]-	295.2	195.5
1047	EICO	13-HODE	0.0109432	nmol/mL	Negative	[M-H]-	295.2	195.5
1049	EICO	13-HODE	0.0351837	nmol/mL	Negative	[M-H]-	295.2	195.5
1051	EICO	13-HODE	0.0348378	nmol/mL	Negative	[M-H]-	295.2	195.5
1052	EICO	13-HODE	0.011855	nmol/mL	Negative	[M-H]-	295.2	195.5
1053	EICO	13-HODE	0.0258296	nmol/mL	Negative	[M-H]-	295.2	195.5
1056	EICO	13-HODE	0.0145445	nmol/mL	Negative	[M-H]-	295.2	195.5
1057	EICO	13-HODE	0.0345755	nmol/mL	Negative	[M-H]-	295.2	195.5
1061	EICO	13-HODE	0.0156166	nmol/mL	Negative	[M-H]-	295.2	195.5
2001	EICO	13-HODE	0.0566871	nmol/mL	Negative	[M-H]-	295.2	195.5
2004	EICO	13-HODE	0.0363818	nmol/mL	Negative	[M-H]-	295.2	195.5
2005	EICO	13-HODE	0.0529183	nmol/mL	Negative	[M-H]-	295.2	195.5
2008	EICO	13-HODE	0.0422247	nmol/mL	Negative	[M-H]-	295.2	195.5
2012	EICO	13-HODE	0.0101018	nmol/mL	Negative	[M-H]-	295.2	195.5
2013	EICO	13-HODE	0.138816	nmol/mL	Negative	[M-H]-	295.2	195.5
2014	EICO	13-HODE	0.0780036	nmol/mL	Negative	[M-H]-	295.2	195.5
2015	EICO	13-HODE	0.0188102	nmol/mL	Negative	[M-H]-	295.2	195.5
2019	EICO	13-HODE	0.00813106	nmol/mL	Negative	[M-H]-	295.2	195.5
2020	EICO	13-HODE	0.0103852	nmol/mL	Negative	[M-H]-	295.2	195.5
2021	EICO	13-HODE	0.00993085	nmol/mL	Negative	[M-H]-	295.2	195.5
2022	EICO	13-HODE	0.120428	nmol/mL	Negative	[M-H]-	295.2	195.5
2023	EICO	13-HODE	0.0150439	nmol/mL	Negative	[M-H]-	295.2	195.5
2023	EICO	13-HODE	0.0150439	nmol/mL	Negative	[M-H]-	295.2	195.5
2024	EICO	13-HODE	0.0179554	nmol/mL	Negative	[M-H]-	295.2	195.5
2025	EICO	13-HODE	0.0449104	nmol/mL	Negative	[M-H]-	295.2	195.5
2026	EICO	13-HODE	0.048664	nmol/mL	Negative	[M-H]-	295.2	195.5
2027	EICO	13-HODE	0.0170115	nmol/mL	Negative	[M-H]-	295.2	195.5
2028	EICO	13-HODE	0.0764673	nmol/mL	Negative	[M-H]-	295.2	195.5
2029	EICO	13-HODE	0.0138904	nmol/mL	Negative	[M-H]-	295.2	195.5
2030	EICO	13-HODE	0.0494447	nmol/mL	Negative	[M-H]-	295.2	195.5
2031	EICO	13-HODE	0.0171028	nmol/mL	Negative	[M-H]-	295.2	195.5
2034	EICO	13-HODE	0.0182312	nmol/mL	Negative	[M-H]-	295.2	195.5
2035	EICO	13-HODE	0.0173405	nmol/mL	Negative	[M-H]-	295.2	195.5
2036	EICO	13-HODE	0.0155737	nmol/mL	Negative	[M-H]-	295.2	195.5
2037	EICO	13-HODE	0.0479961	nmol/mL	Negative	[M-H]-	295.2	195.5
2038	EICO	13-HODE	0.0662321	nmol/mL	Negative	[M-H]-	295.2	195.5
2041	EICO	13-HODE	0.0144242	nmol/mL	Negative	[M-H]-	295.2	195.5
2044	EICO	13-HODE	0.248383	nmol/mL	Negative	[M-H]-	295.2	195.5
2045	EICO	13-HODE	0.0166375	nmol/mL	Negative	[M-H]-	295.2	195.5
2047	EICO	13-HODE	0.0246651	nmol/mL	Negative	[M-H]-	295.2	195.5
2049	EICO	13-HODE	0.0197567	nmol/mL	Negative	[M-H]-	295.2	195.5
2051	EICO	13-HODE	0.0170773	nmol/mL	Negative	[M-H]-	295.2	195.5
2052	EICO	13-HODE	0.0190927	nmol/mL	Negative	[M-H]-	295.2	195.5
2054	EICO	13-HODE	0.0155087	nmol/mL	Negative	[M-H]-	295.2	195.5
2055	EICO	13-HODE	0.0102734	nmol/mL	Negative	[M-H]-	295.2	195.5
2056	EICO	13-HODE	0.0399956	nmol/mL	Negative	[M-H]-	295.2	195.5
2058	EICO	13-HODE	0.0246607	nmol/mL	Negative	[M-H]-	295.2	195.5
2060	EICO	13-HODE	0.0333865	nmol/mL	Negative	[M-H]-	295.2	195.5
2061	EICO	13-HODE	0.0102346	nmol/mL	Negative	[M-H]-	295.2	195.5
2064	EICO	13-HODE	0.026618	nmol/mL	Negative	[M-H]-	295.2	195.5
3001	EICO	13-HODE	0.00713341	nmol/mL	Negative	[M-H]-	295.2	195.5
3002	EICO	13-HODE	0.0604947	nmol/mL	Negative	[M-H]-	295.2	195.5
3003	EICO	13-HODE	0.0183238	nmol/mL	Negative	[M-H]-	295.2	195.5
3004	EICO	13-HODE	0.036284	nmol/mL	Negative	[M-H]-	295.2	195.5
3005	EICO	13-HODE	0.0484222	nmol/mL	Negative	[M-H]-	295.2	195.5
3006	EICO	13-HODE	0.0116597	nmol/mL	Negative	[M-H]-	295.2	195.5
3007	EICO	13-HODE	0.017832	nmol/mL	Negative	[M-H]-	295.2	195.5
3008	EICO	13-HODE	0.0292953	nmol/mL	Negative	[M-H]-	295.2	195.5
3009	EICO	13-HODE	0.0388623	nmol/mL	Negative	[M-H]-	295.2	195.5
3012	EICO	13-HODE	0.0305224	nmol/mL	Negative	[M-H]-	295.2	195.5
3014	EICO	13-HODE	0.0150013	nmol/mL	Negative	[M-H]-	295.2	195.5
3016	EICO	13-HODE	0.0125751	nmol/mL	Negative	[M-H]-	295.2	195.5
3018	EICO	13-HODE	0.0112227	nmol/mL	Negative	[M-H]-	295.2	195.5
3019	EICO	13-HODE	0.0251891	nmol/mL	Negative	[M-H]-	295.2	195.5
3021	EICO	13-HODE	0.018778	nmol/mL	Negative	[M-H]-	295.2	195.5
3022	EICO	13-HODE	0.0431273	nmol/mL	Negative	[M-H]-	295.2	195.5
3024	EICO	13-HODE	0.0127726	nmol/mL	Negative	[M-H]-	295.2	195.5
3025	EICO	13-HODE	0.0124225	nmol/mL	Negative	[M-H]-	295.2	195.5
3026	EICO	13-HODE	0.0169422	nmol/mL	Negative	[M-H]-	295.2	195.5
3028	EICO	13-HODE	0.0111963	nmol/mL	Negative	[M-H]-	295.2	195.5
3029	EICO	13-HODE	0.0110383	nmol/mL	Negative	[M-H]-	295.2	195.5
3030	EICO	13-HODE	0.0159932	nmol/mL	Negative	[M-H]-	295.2	195.5
3031	EICO	13-HODE	0.0179732	nmol/mL	Negative	[M-H]-	295.2	195.5
3034	EICO	13-HODE	0.018215	nmol/mL	Negative	[M-H]-	295.2	195.5
3035	EICO	13-HODE	0.0125137	nmol/mL	Negative	[M-H]-	295.2	195.5
3037	EICO	13-HODE	0.126169	nmol/mL	Negative	[M-H]-	295.2	195.5
3039	EICO	13-HODE	0.0167475	nmol/mL	Negative	[M-H]-	295.2	195.5
3040	EICO	13-HODE	0.0271229	nmol/mL	Negative	[M-H]-	295.2	195.5
3042	EICO	13-HODE	0.0304352	nmol/mL	Negative	[M-H]-	295.2	195.5
3045	EICO	13-HODE	0.0222644	nmol/mL	Negative	[M-H]-	295.2	195.5
3046	EICO	13-HODE	0.0598588	nmol/mL	Negative	[M-H]-	295.2	195.5
3047	EICO	13-HODE	0.0129062	nmol/mL	Negative	[M-H]-	295.2	195.5
3049	EICO	13-HODE	0.0341256	nmol/mL	Negative	[M-H]-	295.2	195.5
3051	EICO	13-HODE	0.0559474	nmol/mL	Negative	[M-H]-	295.2	195.5
3055	EICO	13-HODE	0.020659	nmol/mL	Negative	[M-H]-	295.2	195.5
3059	EICO	13-HODE	0.0173807	nmol/mL	Negative	[M-H]-	295.2	195.5
3060	EICO	13-HODE	0.0115524	nmol/mL	Negative	[M-H]-	295.2	195.5
3061	EICO	13-HODE	0.129872	nmol/mL	Negative	[M-H]-	295.2	195.5
3064	EICO	13-HODE	0.00823761	nmol/mL	Negative	[M-H]-	295.2	195.5
3065	EICO	13-HODE	0.0190072	nmol/mL	Negative	[M-H]-	295.2	195.5
4002	EICO	13-HODE	0.0466361	nmol/mL	Negative	[M-H]-	295.2	195.5
4003	EICO	13-HODE	0.030094	nmol/mL	Negative	[M-H]-	295.2	195.5
4004	EICO	13-HODE	0.0173754	nmol/mL	Negative	[M-H]-	295.2	195.5
4005	EICO	13-HODE	0.0480925	nmol/mL	Negative	[M-H]-	295.2	195.5
4007	EICO	13-HODE	0.0572547	nmol/mL	Negative	[M-H]-	295.2	195.5
4008	EICO	13-HODE	0.0387783	nmol/mL	Negative	[M-H]-	295.2	195.5
4009	EICO	13-HODE	0.0106602	nmol/mL	Negative	[M-H]-	295.2	195.5
4011	EICO	13-HODE	0.0830321	nmol/mL	Negative	[M-H]-	295.2	195.5
4012	EICO	13-HODE	0.0225362	nmol/mL	Negative	[M-H]-	295.2	195.5
4015	EICO	13-HODE	0.0428555	nmol/mL	Negative	[M-H]-	295.2	195.5
4017	EICO	13-HODE	0.0592162	nmol/mL	Negative	[M-H]-	295.2	195.5
4019	EICO	13-HODE	0.0241422	nmol/mL	Negative	[M-H]-	295.2	195.5
4022	EICO	13-HODE	0.0320479	nmol/mL	Negative	[M-H]-	295.2	195.5
4025	EICO	13-HODE	0.0176019	nmol/mL	Negative	[M-H]-	295.2	195.5
4026	EICO	13-HODE	0.0353871	nmol/mL	Negative	[M-H]-	295.2	195.5
4027	EICO	13-HODE	0.0208028	nmol/mL	Negative	[M-H]-	295.2	195.5
4028	EICO	13-HODE	0.16542	nmol/mL	Negative	[M-H]-	295.2	195.5
4030	EICO	13-HODE	0.0157014	nmol/mL	Negative	[M-H]-	295.2	195.5
4031	EICO	13-HODE	0.0223949	nmol/mL	Negative	[M-H]-	295.2	195.5
4032	EICO	13-HODE	0.15076	nmol/mL	Negative	[M-H]-	295.2	195.5
4034	EICO	13-HODE	0.0309846	nmol/mL	Negative	[M-H]-	295.2	195.5
4035	EICO	13-HODE	0.0163179	nmol/mL	Negative	[M-H]-	295.2	195.5
4037	EICO	13-HODE	0.078819	nmol/mL	Negative	[M-H]-	295.2	195.5
4039	EICO	13-HODE	0.106631	nmol/mL	Negative	[M-H]-	295.2	195.5
4040	EICO	13-HODE	0.0294061	nmol/mL	Negative	[M-H]-	295.2	195.5
4041	EICO	13-HODE	0.033118	nmol/mL	Negative	[M-H]-	295.2	195.5
4042	EICO	13-HODE	0.130726	nmol/mL	Negative	[M-H]-	295.2	195.5
4043	EICO	13-HODE	0.0599315	nmol/mL	Negative	[M-H]-	295.2	195.5
4045	EICO	13-HODE	0.0700785	nmol/mL	Negative	[M-H]-	295.2	195.5
4046	EICO	13-HODE	0.0350768	nmol/mL	Negative	[M-H]-	295.2	195.5
4047	EICO	13-HODE	0.0165558	nmol/mL	Negative	[M-H]-	295.2	195.5
4048	EICO	13-HODE	0.054034	nmol/mL	Negative	[M-H]-	295.2	195.5
4049	EICO	13-HODE	0.0243279	nmol/mL	Negative	[M-H]-	295.2	195.5
4050	EICO	13-HODE	0.0149296	nmol/mL	Negative	[M-H]-	295.2	195.5
4052	EICO	13-HODE	0.0922447	nmol/mL	Negative	[M-H]-	295.2	195.5
4054	EICO	13-HODE	0.0136578	nmol/mL	Negative	[M-H]-	295.2	195.5
4055	EICO	13-HODE	0.0150432	nmol/mL	Negative	[M-H]-	295.2	195.5
4056	EICO	13-HODE	0.0386855	nmol/mL	Negative	[M-H]-	295.2	195.5
4057	EICO	13-HODE	0.0162395	nmol/mL	Negative	[M-H]-	295.2	195.5
4061	EICO	13-HODE	0.032935	nmol/mL	Negative	[M-H]-	295.2	195.5
1001	EICO	14_15-DHET	0.0195668	nmol/mL	Negative	[M-H]-	337.2	207.2
1003	EICO	14_15-DHET	0.050581	nmol/mL	Negative	[M-H]-	337.2	207.2
1004	EICO	14_15-DHET	0.0146733	nmol/mL	Negative	[M-H]-	337.2	207.2
1005	EICO	14_15-DHET	0.0170661	nmol/mL	Negative	[M-H]-	337.2	207.2
1006	EICO	14_15-DHET	0.0146214	nmol/mL	Negative	[M-H]-	337.2	207.2
1007	EICO	14_15-DHET	0.00903517	nmol/mL	Negative	[M-H]-	337.2	207.2
1011	EICO	14_15-DHET	0.00980013	nmol/mL	Negative	[M-H]-	337.2	207.2
1012	EICO	14_15-DHET	0.00920752	nmol/mL	Negative	[M-H]-	337.2	207.2
1013	EICO	14_15-DHET	0.0150105	nmol/mL	Negative	[M-H]-	337.2	207.2
1015	EICO	14_15-DHET	0.00788073	nmol/mL	Negative	[M-H]-	337.2	207.2
1017	EICO	14_15-DHET	0.027368	nmol/mL	Negative	[M-H]-	337.2	207.2
1018	EICO	14_15-DHET	0.00823248	nmol/mL	Negative	[M-H]-	337.2	207.2
1019	EICO	14_15-DHET	0.0206584	nmol/mL	Negative	[M-H]-	337.2	207.2
1020	EICO	14_15-DHET	0.018877	nmol/mL	Negative	[M-H]-	337.2	207.2
1022	EICO	14_15-DHET	0.0147197	nmol/mL	Negative	[M-H]-	337.2	207.2
1023	EICO	14_15-DHET	0.0112416	nmol/mL	Negative	[M-H]-	337.2	207.2
1024	EICO	14_15-DHET	0.0096221	nmol/mL	Negative	[M-H]-	337.2	207.2
1026	EICO	14_15-DHET	0.0178403	nmol/mL	Negative	[M-H]-	337.2	207.2
1027	EICO	14_15-DHET	0.021677	nmol/mL	Negative	[M-H]-	337.2	207.2
1030	EICO	14_15-DHET	0.0120941	nmol/mL	Negative	[M-H]-	337.2	207.2
1031	EICO	14_15-DHET	0.0206691	nmol/mL	Negative	[M-H]-	337.2	207.2
1032	EICO	14_15-DHET	0.017611	nmol/mL	Negative	[M-H]-	337.2	207.2
1033	EICO	14_15-DHET	0.011164	nmol/mL	Negative	[M-H]-	337.2	207.2
1034	EICO	14_15-DHET	0.0194883	nmol/mL	Negative	[M-H]-	337.2	207.2
1035	EICO	14_15-DHET	0.01091	nmol/mL	Negative	[M-H]-	337.2	207.2
1036	EICO	14_15-DHET	0.01986	nmol/mL	Negative	[M-H]-	337.2	207.2
1037	EICO	14_15-DHET	0.0129919	nmol/mL	Negative	[M-H]-	337.2	207.2
1040	EICO	14_15-DHET	0.0138607	nmol/mL	Negative	[M-H]-	337.2	207.2
1042	EICO	14_15-DHET	0.0262871	nmol/mL	Negative	[M-H]-	337.2	207.2
1044	EICO	14_15-DHET	0.0265064	nmol/mL	Negative	[M-H]-	337.2	207.2
1045	EICO	14_15-DHET	0.0101054	nmol/mL	Negative	[M-H]-	337.2	207.2
1046	EICO	14_15-DHET	0.0136684	nmol/mL	Negative	[M-H]-	337.2	207.2
1047	EICO	14_15-DHET	0.0190841	nmol/mL	Negative	[M-H]-	337.2	207.2
1049	EICO	14_15-DHET	0.0128153	nmol/mL	Negative	[M-H]-	337.2	207.2
1051	EICO	14_15-DHET	0.0115331	nmol/mL	Negative	[M-H]-	337.2	207.2
1052	EICO	14_15-DHET	0.0115498	nmol/mL	Negative	[M-H]-	337.2	207.2
1053	EICO	14_15-DHET	0.0140275	nmol/mL	Negative	[M-H]-	337.2	207.2
1056	EICO	14_15-DHET	0.0151788	nmol/mL	Negative	[M-H]-	337.2	207.2
1057	EICO	14_15-DHET	0.0206983	nmol/mL	Negative	[M-H]-	337.2	207.2
1061	EICO	14_15-DHET	0.0136794	nmol/mL	Negative	[M-H]-	337.2	207.2
2001	EICO	14_15-DHET	0.00583399	nmol/mL	Negative	[M-H]-	337.2	207.2
2004	EICO	14_15-DHET	0.0140562	nmol/mL	Negative	[M-H]-	337.2	207.2
2005	EICO	14_15-DHET	0.00994233	nmol/mL	Negative	[M-H]-	337.2	207.2
2008	EICO	14_15-DHET	0.0075283	nmol/mL	Negative	[M-H]-	337.2	207.2
2012	EICO	14_15-DHET	0.0085802	nmol/mL	Negative	[M-H]-	337.2	207.2
2013	EICO	14_15-DHET	0.0267322	nmol/mL	Negative	[M-H]-	337.2	207.2
2014	EICO	14_15-DHET	0.00862639	nmol/mL	Negative	[M-H]-	337.2	207.2
2015	EICO	14_15-DHET	0.00687653	nmol/mL	Negative	[M-H]-	337.2	207.2
2019	EICO	14_15-DHET	0.00912998	nmol/mL	Negative	[M-H]-	337.2	207.2
2020	EICO	14_15-DHET	0.0272471	nmol/mL	Negative	[M-H]-	337.2	207.2
2021	EICO	14_15-DHET	0.00800878	nmol/mL	Negative	[M-H]-	337.2	207.2
2022	EICO	14_15-DHET	0.00880614	nmol/mL	Negative	[M-H]-	337.2	207.2
2023	EICO	14_15-DHET	0.00811519	nmol/mL	Negative	[M-H]-	337.2	207.2
2023	EICO	14_15-DHET	0.00811519	nmol/mL	Negative	[M-H]-	337.2	207.2
2024	EICO	14_15-DHET	0.0084058	nmol/mL	Negative	[M-H]-	337.2	207.2
2025	EICO	14_15-DHET	0.0106496	nmol/mL	Negative	[M-H]-	337.2	207.2
2026	EICO	14_15-DHET	0.00936805	nmol/mL	Negative	[M-H]-	337.2	207.2
2027	EICO	14_15-DHET	0.0129203	nmol/mL	Negative	[M-H]-	337.2	207.2
2028	EICO	14_15-DHET	0.00887606	nmol/mL	Negative	[M-H]-	337.2	207.2
2029	EICO	14_15-DHET	0.0149791	nmol/mL	Negative	[M-H]-	337.2	207.2
2030	EICO	14_15-DHET	0.0123303	nmol/mL	Negative	[M-H]-	337.2	207.2
2031	EICO	14_15-DHET	0.013018	nmol/mL	Negative	[M-H]-	337.2	207.2
2034	EICO	14_15-DHET	0.0118681	nmol/mL	Negative	[M-H]-	337.2	207.2
2035	EICO	14_15-DHET	0.00580945	nmol/mL	Negative	[M-H]-	337.2	207.2
2036	EICO	14_15-DHET	0.00741069	nmol/mL	Negative	[M-H]-	337.2	207.2
2037	EICO	14_15-DHET	0.0102695	nmol/mL	Negative	[M-H]-	337.2	207.2
2038	EICO	14_15-DHET	0.0097857	nmol/mL	Negative	[M-H]-	337.2	207.2
2041	EICO	14_15-DHET	0.0148509	nmol/mL	Negative	[M-H]-	337.2	207.2
2044	EICO	14_15-DHET	0.00725171	nmol/mL	Negative	[M-H]-	337.2	207.2
2045	EICO	14_15-DHET	0.00973892	nmol/mL	Negative	[M-H]-	337.2	207.2
2047	EICO	14_15-DHET	0.0142942	nmol/mL	Negative	[M-H]-	337.2	207.2
2049	EICO	14_15-DHET	0.00612158	nmol/mL	Negative	[M-H]-	337.2	207.2
2051	EICO	14_15-DHET	0.0126203	nmol/mL	Negative	[M-H]-	337.2	207.2
2052	EICO	14_15-DHET	0.0110676	nmol/mL	Negative	[M-H]-	337.2	207.2
2054	EICO	14_15-DHET	0.00664712	nmol/mL	Negative	[M-H]-	337.2	207.2
2055	EICO	14_15-DHET	0.00531752	nmol/mL	Negative	[M-H]-	337.2	207.2
2056	EICO	14_15-DHET	0.00716572	nmol/mL	Negative	[M-H]-	337.2	207.2
2058	EICO	14_15-DHET	0.00468826	nmol/mL	Negative	[M-H]-	337.2	207.2
2060	EICO	14_15-DHET	0.0133294	nmol/mL	Negative	[M-H]-	337.2	207.2
2061	EICO	14_15-DHET	0.0228225	nmol/mL	Negative	[M-H]-	337.2	207.2
2064	EICO	14_15-DHET	0.00702383	nmol/mL	Negative	[M-H]-	337.2	207.2
3001	EICO	14_15-DHET	0.0081716	nmol/mL	Negative	[M-H]-	337.2	207.2
3002	EICO	14_15-DHET	0.0315487	nmol/mL	Negative	[M-H]-	337.2	207.2
3003	EICO	14_15-DHET	0.020161	nmol/mL	Negative	[M-H]-	337.2	207.2
3004	EICO	14_15-DHET	0.0172294	nmol/mL	Negative	[M-H]-	337.2	207.2
3005	EICO	14_15-DHET	0.0313721	nmol/mL	Negative	[M-H]-	337.2	207.2
3006	EICO	14_15-DHET	0.0157226	nmol/mL	Negative	[M-H]-	337.2	207.2
3007	EICO	14_15-DHET	0.0105817	nmol/mL	Negative	[M-H]-	337.2	207.2
3008	EICO	14_15-DHET	0.0198389	nmol/mL	Negative	[M-H]-	337.2	207.2
3009	EICO	14_15-DHET	0.0173551	nmol/mL	Negative	[M-H]-	337.2	207.2
3012	EICO	14_15-DHET	0.0194992	nmol/mL	Negative	[M-H]-	337.2	207.2
3014	EICO	14_15-DHET	0.00884859	nmol/mL	Negative	[M-H]-	337.2	207.2
3016	EICO	14_15-DHET	0.0153864	nmol/mL	Negative	[M-H]-	337.2	207.2
3018	EICO	14_15-DHET	0.0118496	nmol/mL	Negative	[M-H]-	337.2	207.2
3019	EICO	14_15-DHET	0.00767763	nmol/mL	Negative	[M-H]-	337.2	207.2
3021	EICO	14_15-DHET	0.012301	nmol/mL	Negative	[M-H]-	337.2	207.2
3022	EICO	14_15-DHET	0.0134587	nmol/mL	Negative	[M-H]-	337.2	207.2
3024	EICO	14_15-DHET	0.0126115	nmol/mL	Negative	[M-H]-	337.2	207.2
3025	EICO	14_15-DHET	0.01516	nmol/mL	Negative	[M-H]-	337.2	207.2
3026	EICO	14_15-DHET	0.0254944	nmol/mL	Negative	[M-H]-	337.2	207.2
3028	EICO	14_15-DHET	0.0181379	nmol/mL	Negative	[M-H]-	337.2	207.2
3029	EICO	14_15-DHET	0.0188578	nmol/mL	Negative	[M-H]-	337.2	207.2
3030	EICO	14_15-DHET	0.0247085	nmol/mL	Negative	[M-H]-	337.2	207.2
3031	EICO	14_15-DHET	0.00709024	nmol/mL	Negative	[M-H]-	337.2	207.2
3034	EICO	14_15-DHET	0.0109737	nmol/mL	Negative	[M-H]-	337.2	207.2
3035	EICO	14_15-DHET	0.00671134	nmol/mL	Negative	[M-H]-	337.2	207.2
3037	EICO	14_15-DHET	0.0186772	nmol/mL	Negative	[M-H]-	337.2	207.2
3039	EICO	14_15-DHET	0.0150724	nmol/mL	Negative	[M-H]-	337.2	207.2
3040	EICO	14_15-DHET	0.0100241	nmol/mL	Negative	[M-H]-	337.2	207.2
3042	EICO	14_15-DHET	0.0119245	nmol/mL	Negative	[M-H]-	337.2	207.2
3045	EICO	14_15-DHET	0.00760915	nmol/mL	Negative	[M-H]-	337.2	207.2
3046	EICO	14_15-DHET	0.0103535	nmol/mL	Negative	[M-H]-	337.2	207.2
3047	EICO	14_15-DHET	0.0214849	nmol/mL	Negative	[M-H]-	337.2	207.2
3049	EICO	14_15-DHET	0.0274822	nmol/mL	Negative	[M-H]-	337.2	207.2
3051	EICO	14_15-DHET	0.00758142	nmol/mL	Negative	[M-H]-	337.2	207.2
3055	EICO	14_15-DHET	0.0159901	nmol/mL	Negative	[M-H]-	337.2	207.2
3059	EICO	14_15-DHET	0.0062939	nmol/mL	Negative	[M-H]-	337.2	207.2
3060	EICO	14_15-DHET	0.0142238	nmol/mL	Negative	[M-H]-	337.2	207.2
3061	EICO	14_15-DHET	0.00579552	nmol/mL	Negative	[M-H]-	337.2	207.2
3064	EICO	14_15-DHET	0.0150219	nmol/mL	Negative	[M-H]-	337.2	207.2
3065	EICO	14_15-DHET	0.0154174	nmol/mL	Negative	[M-H]-	337.2	207.2
4002	EICO	14_15-DHET	0.0126933	nmol/mL	Negative	[M-H]-	337.2	207.2
4003	EICO	14_15-DHET	0.0121628	nmol/mL	Negative	[M-H]-	337.2	207.2
4004	EICO	14_15-DHET	0.0104579	nmol/mL	Negative	[M-H]-	337.2	207.2
4005	EICO	14_15-DHET	0.0176492	nmol/mL	Negative	[M-H]-	337.2	207.2
4007	EICO	14_15-DHET	0.00633416	nmol/mL	Negative	[M-H]-	337.2	207.2
4008	EICO	14_15-DHET	0.01108	nmol/mL	Negative	[M-H]-	337.2	207.2
4009	EICO	14_15-DHET	0.00627349	nmol/mL	Negative	[M-H]-	337.2	207.2
4011	EICO	14_15-DHET	0.0118083	nmol/mL	Negative	[M-H]-	337.2	207.2
4012	EICO	14_15-DHET	0.014789	nmol/mL	Negative	[M-H]-	337.2	207.2
4015	EICO	14_15-DHET	0.00709165	nmol/mL	Negative	[M-H]-	337.2	207.2
4017	EICO	14_15-DHET	0.0113031	nmol/mL	Negative	[M-H]-	337.2	207.2
4019	EICO	14_15-DHET	0.0204672	nmol/mL	Negative	[M-H]-	337.2	207.2
4022	EICO	14_15-DHET	0.00989037	nmol/mL	Negative	[M-H]-	337.2	207.2
4025	EICO	14_15-DHET	0.0116353	nmol/mL	Negative	[M-H]-	337.2	207.2
4026	EICO	14_15-DHET	0.010296	nmol/mL	Negative	[M-H]-	337.2	207.2
4027	EICO	14_15-DHET	0.00934684	nmol/mL	Negative	[M-H]-	337.2	207.2
4028	EICO	14_15-DHET	0.0109709	nmol/mL	Negative	[M-H]-	337.2	207.2
4030	EICO	14_15-DHET	0.0132507	nmol/mL	Negative	[M-H]-	337.2	207.2
4031	EICO	14_15-DHET	0.00586209	nmol/mL	Negative	[M-H]-	337.2	207.2
4032	EICO	14_15-DHET	0.00943233	nmol/mL	Negative	[M-H]-	337.2	207.2
4034	EICO	14_15-DHET	0.00717373	nmol/mL	Negative	[M-H]-	337.2	207.2
4035	EICO	14_15-DHET	0.0206843	nmol/mL	Negative	[M-H]-	337.2	207.2
4037	EICO	14_15-DHET	0.0156649	nmol/mL	Negative	[M-H]-	337.2	207.2
4039	EICO	14_15-DHET	0.00768698	nmol/mL	Negative	[M-H]-	337.2	207.2
4040	EICO	14_15-DHET	0.01641	nmol/mL	Negative	[M-H]-	337.2	207.2
4041	EICO	14_15-DHET	0.0122568	nmol/mL	Negative	[M-H]-	337.2	207.2
4042	EICO	14_15-DHET	0.0124171	nmol/mL	Negative	[M-H]-	337.2	207.2
4043	EICO	14_15-DHET	0.00968175	nmol/mL	Negative	[M-H]-	337.2	207.2
4045	EICO	14_15-DHET	0.00977157	nmol/mL	Negative	[M-H]-	337.2	207.2
4046	EICO	14_15-DHET	0.00999168	nmol/mL	Negative	[M-H]-	337.2	207.2
4047	EICO	14_15-DHET	0.028677	nmol/mL	Negative	[M-H]-	337.2	207.2
4048	EICO	14_15-DHET	0.0254971	nmol/mL	Negative	[M-H]-	337.2	207.2
4049	EICO	14_15-DHET	0.00814662	nmol/mL	Negative	[M-H]-	337.2	207.2
4050	EICO	14_15-DHET	0.0131231	nmol/mL	Negative	[M-H]-	337.2	207.2
4052	EICO	14_15-DHET	0.0139344	nmol/mL	Negative	[M-H]-	337.2	207.2
4054	EICO	14_15-DHET	0.00718872	nmol/mL	Negative	[M-H]-	337.2	207.2
4055	EICO	14_15-DHET	0.00788971	nmol/mL	Negative	[M-H]-	337.2	207.2
4056	EICO	14_15-DHET	0.011586	nmol/mL	Negative	[M-H]-	337.2	207.2
4057	EICO	14_15-DHET	0.0123764	nmol/mL	Negative	[M-H]-	337.2	207.2
4061	EICO	14_15-DHET	0.00785013	nmol/mL	Negative	[M-H]-	337.2	207.2
1001	EICO	15-HETE	0.00280768	nmol/mL	Negative	[M-H]-	319.2	219.2
1003	EICO	15-HETE	0.00396362	nmol/mL	Negative	[M-H]-	319.2	219.2
1004	EICO	15-HETE	0.00912014	nmol/mL	Negative	[M-H]-	319.2	219.2
1005	EICO	15-HETE	0.00396894	nmol/mL	Negative	[M-H]-	319.2	219.2
1006	EICO	15-HETE	0.00632803	nmol/mL	Negative	[M-H]-	319.2	219.2
1007	EICO	15-HETE	0.00291622	nmol/mL	Negative	[M-H]-	319.2	219.2
1011	EICO	15-HETE	0.00359557	nmol/mL	Negative	[M-H]-	319.2	219.2
1012	EICO	15-HETE	0.00291823	nmol/mL	Negative	[M-H]-	319.2	219.2
1013	EICO	15-HETE	0.00469187	nmol/mL	Negative	[M-H]-	319.2	219.2
1015	EICO	15-HETE	0.00424184	nmol/mL	Negative	[M-H]-	319.2	219.2
1017	EICO	15-HETE	0.00717864	nmol/mL	Negative	[M-H]-	319.2	219.2
1018	EICO	15-HETE	0.0575367	nmol/mL	Negative	[M-H]-	319.2	219.2
1019	EICO	15-HETE	0.00745439	nmol/mL	Negative	[M-H]-	319.2	219.2
1020	EICO	15-HETE	0.00366728	nmol/mL	Negative	[M-H]-	319.2	219.2
1022	EICO	15-HETE	0.00955659	nmol/mL	Negative	[M-H]-	319.2	219.2
1023	EICO	15-HETE	0.00249957	nmol/mL	Negative	[M-H]-	319.2	219.2
1024	EICO	15-HETE	0.00916658	nmol/mL	Negative	[M-H]-	319.2	219.2
1026	EICO	15-HETE	0.0189387	nmol/mL	Negative	[M-H]-	319.2	219.2
1027	EICO	15-HETE	0.00433195	nmol/mL	Negative	[M-H]-	319.2	219.2
1030	EICO	15-HETE	0.00242774	nmol/mL	Negative	[M-H]-	319.2	219.2
1031	EICO	15-HETE	0.00924195	nmol/mL	Negative	[M-H]-	319.2	219.2
1032	EICO	15-HETE	0.00635051	nmol/mL	Negative	[M-H]-	319.2	219.2
1033	EICO	15-HETE	0.00268034	nmol/mL	Negative	[M-H]-	319.2	219.2
1034	EICO	15-HETE	0.00713658	nmol/mL	Negative	[M-H]-	319.2	219.2
1035	EICO	15-HETE	0.0158933	nmol/mL	Negative	[M-H]-	319.2	219.2
1036	EICO	15-HETE	0.0122285	nmol/mL	Negative	[M-H]-	319.2	219.2
1037	EICO	15-HETE	0.00431385	nmol/mL	Negative	[M-H]-	319.2	219.2
1040	EICO	15-HETE	0.00533008	nmol/mL	Negative	[M-H]-	319.2	219.2
1042	EICO	15-HETE	0.0083297	nmol/mL	Negative	[M-H]-	319.2	219.2
1044	EICO	15-HETE	0.00383024	nmol/mL	Negative	[M-H]-	319.2	219.2
1045	EICO	15-HETE	0.00274466	nmol/mL	Negative	[M-H]-	319.2	219.2
1046	EICO	15-HETE	0.00287696	nmol/mL	Negative	[M-H]-	319.2	219.2
1047	EICO	15-HETE	0.00303363	nmol/mL	Negative	[M-H]-	319.2	219.2
1049	EICO	15-HETE	0.00318395	nmol/mL	Negative	[M-H]-	319.2	219.2
1051	EICO	15-HETE	0.00416155	nmol/mL	Negative	[M-H]-	319.2	219.2
1052	EICO	15-HETE	0.00283467	nmol/mL	Negative	[M-H]-	319.2	219.2
1053	EICO	15-HETE	0.00341036	nmol/mL	Negative	[M-H]-	319.2	219.2
1056	EICO	15-HETE	0.00341546	nmol/mL	Negative	[M-H]-	319.2	219.2
1057	EICO	15-HETE	0.00512549	nmol/mL	Negative	[M-H]-	319.2	219.2
1061	EICO	15-HETE	0.0115659	nmol/mL	Negative	[M-H]-	319.2	219.2
2001	EICO	15-HETE	0.010268	nmol/mL	Negative	[M-H]-	319.2	219.2
2004	EICO	15-HETE	0.00475498	nmol/mL	Negative	[M-H]-	319.2	219.2
2005	EICO	15-HETE	0.00404613	nmol/mL	Negative	[M-H]-	319.2	219.2
2008	EICO	15-HETE	0.00338509	nmol/mL	Negative	[M-H]-	319.2	219.2
2012	EICO	15-HETE	0.00263075	nmol/mL	Negative	[M-H]-	319.2	219.2
2013	EICO	15-HETE	0.00361907	nmol/mL	Negative	[M-H]-	319.2	219.2
2014	EICO	15-HETE	0.00877871	nmol/mL	Negative	[M-H]-	319.2	219.2
2015	EICO	15-HETE	0.00447728	nmol/mL	Negative	[M-H]-	319.2	219.2
2019	EICO	15-HETE	0.0033173	nmol/mL	Negative	[M-H]-	319.2	219.2
2020	EICO	15-HETE	0.00374777	nmol/mL	Negative	[M-H]-	319.2	219.2
2021	EICO	15-HETE	0.00189482	nmol/mL	Negative	[M-H]-	319.2	219.2
2022	EICO	15-HETE	0.00202578	nmol/mL	Negative	[M-H]-	319.2	219.2
2023	EICO	15-HETE	0.0105458	nmol/mL	Negative	[M-H]-	319.2	219.2
2023	EICO	15-HETE	0.0105458	nmol/mL	Negative	[M-H]-	319.2	219.2
2024	EICO	15-HETE	0.00523003	nmol/mL	Negative	[M-H]-	319.2	219.2
2025	EICO	15-HETE	0.00418369	nmol/mL	Negative	[M-H]-	319.2	219.2
2026	EICO	15-HETE	0.00632912	nmol/mL	Negative	[M-H]-	319.2	219.2
2027	EICO	15-HETE	0.00363965	nmol/mL	Negative	[M-H]-	319.2	219.2
2028	EICO	15-HETE	0.00483213	nmol/mL	Negative	[M-H]-	319.2	219.2
2029	EICO	15-HETE	0.00161779	nmol/mL	Negative	[M-H]-	319.2	219.2
2030	EICO	15-HETE	0.00370942	nmol/mL	Negative	[M-H]-	319.2	219.2
2031	EICO	15-HETE	0.00171988	nmol/mL	Negative	[M-H]-	319.2	219.2
2034	EICO	15-HETE	0.00497496	nmol/mL	Negative	[M-H]-	319.2	219.2
2035	EICO	15-HETE	0.000919534	nmol/mL	Negative	[M-H]-	319.2	219.2
2036	EICO	15-HETE	0.00288848	nmol/mL	Negative	[M-H]-	319.2	219.2
2037	EICO	15-HETE	0.00387581	nmol/mL	Negative	[M-H]-	319.2	219.2
2038	EICO	15-HETE	0.00599207	nmol/mL	Negative	[M-H]-	319.2	219.2
2041	EICO	15-HETE	0.00323671	nmol/mL	Negative	[M-H]-	319.2	219.2
2044	EICO	15-HETE	0.00141042	nmol/mL	Negative	[M-H]-	319.2	219.2
2045	EICO	15-HETE	0.00141728	nmol/mL	Negative	[M-H]-	319.2	219.2
2047	EICO	15-HETE	0.00261993	nmol/mL	Negative	[M-H]-	319.2	219.2
2049	EICO	15-HETE	0.00290466	nmol/mL	Negative	[M-H]-	319.2	219.2
2051	EICO	15-HETE	0.00371064	nmol/mL	Negative	[M-H]-	319.2	219.2
2052	EICO	15-HETE	0.00290423	nmol/mL	Negative	[M-H]-	319.2	219.2
2054	EICO	15-HETE	0.00159913	nmol/mL	Negative	[M-H]-	319.2	219.2
2055	EICO	15-HETE	0.00134435	nmol/mL	Negative	[M-H]-	319.2	219.2
2056	EICO	15-HETE	0.00300431	nmol/mL	Negative	[M-H]-	319.2	219.2
2058	EICO	15-HETE	0.00119521	nmol/mL	Negative	[M-H]-	319.2	219.2
2060	EICO	15-HETE	0.0046741	nmol/mL	Negative	[M-H]-	319.2	219.2
2061	EICO	15-HETE	0.00502272	nmol/mL	Negative	[M-H]-	319.2	219.2
2064	EICO	15-HETE	0.0057288	nmol/mL	Negative	[M-H]-	319.2	219.2
3001	EICO	15-HETE	0.00195512	nmol/mL	Negative	[M-H]-	319.2	219.2
3002	EICO	15-HETE	0.00352935	nmol/mL	Negative	[M-H]-	319.2	219.2
3003	EICO	15-HETE	0.00537338	nmol/mL	Negative	[M-H]-	319.2	219.2
3004	EICO	15-HETE	0.00803536	nmol/mL	Negative	[M-H]-	319.2	219.2
3005	EICO	15-HETE	0.00336766	nmol/mL	Negative	[M-H]-	319.2	219.2
3006	EICO	15-HETE	0.00951521	nmol/mL	Negative	[M-H]-	319.2	219.2
3007	EICO	15-HETE	0.00338199	nmol/mL	Negative	[M-H]-	319.2	219.2
3008	EICO	15-HETE	0.00835013	nmol/mL	Negative	[M-H]-	319.2	219.2
3009	EICO	15-HETE	0.0129634	nmol/mL	Negative	[M-H]-	319.2	219.2
3012	EICO	15-HETE	0.00226868	nmol/mL	Negative	[M-H]-	319.2	219.2
3014	EICO	15-HETE	0.00435414	nmol/mL	Negative	[M-H]-	319.2	219.2
3016	EICO	15-HETE	0.00543109	nmol/mL	Negative	[M-H]-	319.2	219.2
3018	EICO	15-HETE	0.00520031	nmol/mL	Negative	[M-H]-	319.2	219.2
3019	EICO	15-HETE	0.00673962	nmol/mL	Negative	[M-H]-	319.2	219.2
3021	EICO	15-HETE	0.00473629	nmol/mL	Negative	[M-H]-	319.2	219.2
3022	EICO	15-HETE	0.00358222	nmol/mL	Negative	[M-H]-	319.2	219.2
3024	EICO	15-HETE	0.00667119	nmol/mL	Negative	[M-H]-	319.2	219.2
3025	EICO	15-HETE	0.00312758	nmol/mL	Negative	[M-H]-	319.2	219.2
3026	EICO	15-HETE	0.0076698	nmol/mL	Negative	[M-H]-	319.2	219.2
3028	EICO	15-HETE	0.00729623	nmol/mL	Negative	[M-H]-	319.2	219.2
3029	EICO	15-HETE	0.00177425	nmol/mL	Negative	[M-H]-	319.2	219.2
3030	EICO	15-HETE	0.0111523	nmol/mL	Negative	[M-H]-	319.2	219.2
3031	EICO	15-HETE	0.00379374	nmol/mL	Negative	[M-H]-	319.2	219.2
3034	EICO	15-HETE	0.00164489	nmol/mL	Negative	[M-H]-	319.2	219.2
3035	EICO	15-HETE	0.00709937	nmol/mL	Negative	[M-H]-	319.2	219.2
3037	EICO	15-HETE	0.00386964	nmol/mL	Negative	[M-H]-	319.2	219.2
3039	EICO	15-HETE	0.00569965	nmol/mL	Negative	[M-H]-	319.2	219.2
3040	EICO	15-HETE	0.00160038	nmol/mL	Negative	[M-H]-	319.2	219.2
3042	EICO	15-HETE	0.00305734	nmol/mL	Negative	[M-H]-	319.2	219.2
3045	EICO	15-HETE	0.00140624	nmol/mL	Negative	[M-H]-	319.2	219.2
3046	EICO	15-HETE	0.00142744	nmol/mL	Negative	[M-H]-	319.2	219.2
3047	EICO	15-HETE	0.00256808	nmol/mL	Negative	[M-H]-	319.2	219.2
3049	EICO	15-HETE	0.00510912	nmol/mL	Negative	[M-H]-	319.2	219.2
3051	EICO	15-HETE	0.00380402	nmol/mL	Negative	[M-H]-	319.2	219.2
3055	EICO	15-HETE	0.00698551	nmol/mL	Negative	[M-H]-	319.2	219.2
3059	EICO	15-HETE	0.000844963	nmol/mL	Negative	[M-H]-	319.2	219.2
3060	EICO	15-HETE	0.00820104	nmol/mL	Negative	[M-H]-	319.2	219.2
3061	EICO	15-HETE	0.00692802	nmol/mL	Negative	[M-H]-	319.2	219.2
3064	EICO	15-HETE	0.00653154	nmol/mL	Negative	[M-H]-	319.2	219.2
3065	EICO	15-HETE	0.00430842	nmol/mL	Negative	[M-H]-	319.2	219.2
4002	EICO	15-HETE	0.00536124	nmol/mL	Negative	[M-H]-	319.2	219.2
4003	EICO	15-HETE	0.00300017	nmol/mL	Negative	[M-H]-	319.2	219.2
4004	EICO	15-HETE	0.0041564	nmol/mL	Negative	[M-H]-	319.2	219.2
4005	EICO	15-HETE	0.0176758	nmol/mL	Negative	[M-H]-	319.2	219.2
4007	EICO	15-HETE	0.00296159	nmol/mL	Negative	[M-H]-	319.2	219.2
4008	EICO	15-HETE	0.00178692	nmol/mL	Negative	[M-H]-	319.2	219.2
4009	EICO	15-HETE	0.00286741	nmol/mL	Negative	[M-H]-	319.2	219.2
4011	EICO	15-HETE	0.00456968	nmol/mL	Negative	[M-H]-	319.2	219.2
4012	EICO	15-HETE	0.004129	nmol/mL	Negative	[M-H]-	319.2	219.2
4015	EICO	15-HETE	0.00304304	nmol/mL	Negative	[M-H]-	319.2	219.2
4017	EICO	15-HETE	0.00248512	nmol/mL	Negative	[M-H]-	319.2	219.2
4019	EICO	15-HETE	0.0053223	nmol/mL	Negative	[M-H]-	319.2	219.2
4022	EICO	15-HETE	0.00168459	nmol/mL	Negative	[M-H]-	319.2	219.2
4025	EICO	15-HETE	0.00152289	nmol/mL	Negative	[M-H]-	319.2	219.2
4026	EICO	15-HETE	0.00186722	nmol/mL	Negative	[M-H]-	319.2	219.2
4027	EICO	15-HETE	0.00530459	nmol/mL	Negative	[M-H]-	319.2	219.2
4028	EICO	15-HETE	0.00360643	nmol/mL	Negative	[M-H]-	319.2	219.2
4030	EICO	15-HETE	0.0012774	nmol/mL	Negative	[M-H]-	319.2	219.2
4031	EICO	15-HETE	0.00424352	nmol/mL	Negative	[M-H]-	319.2	219.2
4032	EICO	15-HETE	0.00221825	nmol/mL	Negative	[M-H]-	319.2	219.2
4034	EICO	15-HETE	0.00346785	nmol/mL	Negative	[M-H]-	319.2	219.2
4035	EICO	15-HETE	0.00415243	nmol/mL	Negative	[M-H]-	319.2	219.2
4037	EICO	15-HETE	0.00348488	nmol/mL	Negative	[M-H]-	319.2	219.2
4039	EICO	15-HETE	0.00328386	nmol/mL	Negative	[M-H]-	319.2	219.2
4040	EICO	15-HETE	0.00798171	nmol/mL	Negative	[M-H]-	319.2	219.2
4041	EICO	15-HETE	0.00445743	nmol/mL	Negative	[M-H]-	319.2	219.2
4042	EICO	15-HETE	0.00403554	nmol/mL	Negative	[M-H]-	319.2	219.2
4043	EICO	15-HETE	0.00161716	nmol/mL	Negative	[M-H]-	319.2	219.2
4045	EICO	15-HETE	0.0038804	nmol/mL	Negative	[M-H]-	319.2	219.2
4046	EICO	15-HETE	0.00182499	nmol/mL	Negative	[M-H]-	319.2	219.2
4047	EICO	15-HETE	0.00423378	nmol/mL	Negative	[M-H]-	319.2	219.2
4048	EICO	15-HETE	0.00709935	nmol/mL	Negative	[M-H]-	319.2	219.2
4049	EICO	15-HETE	0.00676906	nmol/mL	Negative	[M-H]-	319.2	219.2
4050	EICO	15-HETE	0.00306404	nmol/mL	Negative	[M-H]-	319.2	219.2
4052	EICO	15-HETE	0.00533248	nmol/mL	Negative	[M-H]-	319.2	219.2
4054	EICO	15-HETE	0.00243357	nmol/mL	Negative	[M-H]-	319.2	219.2
4055	EICO	15-HETE	0.0141302	nmol/mL	Negative	[M-H]-	319.2	219.2
4056	EICO	15-HETE	0.0111195	nmol/mL	Negative	[M-H]-	319.2	219.2
4057	EICO	15-HETE	0.00620206	nmol/mL	Negative	[M-H]-	319.2	219.2
4061	EICO	15-HETE	0.0043198	nmol/mL	Negative	[M-H]-	319.2	219.2
1001	EICO	15-HETrE	0.00255333	nmol/mL	Negative	[M-H]-	321.2	221
1003	EICO	15-HETrE	0.00733567	nmol/mL	Negative	[M-H]-	321.2	221
1004	EICO	15-HETrE	0.00338139	nmol/mL	Negative	[M-H]-	321.2	221
1005	EICO	15-HETrE	0.00489505	nmol/mL	Negative	[M-H]-	321.2	221
1006	EICO	15-HETrE	0.003981	nmol/mL	Negative	[M-H]-	321.2	221
1007	EICO	15-HETrE	0.00185718	nmol/mL	Negative	[M-H]-	321.2	221
1011	EICO	15-HETrE	0.00239249	nmol/mL	Negative	[M-H]-	321.2	221
1012	EICO	15-HETrE	0.00221004	nmol/mL	Negative	[M-H]-	321.2	221
1013	EICO	15-HETrE	0.00224189	nmol/mL	Negative	[M-H]-	321.2	221
1015	EICO	15-HETrE	0.0032198	nmol/mL	Negative	[M-H]-	321.2	221
1017	EICO	15-HETrE	0.00428176	nmol/mL	Negative	[M-H]-	321.2	221
1018	EICO	15-HETrE	0.00699741	nmol/mL	Negative	[M-H]-	321.2	221
1019	EICO	15-HETrE	0.00472435	nmol/mL	Negative	[M-H]-	321.2	221
1020	EICO	15-HETrE	0.00620089	nmol/mL	Negative	[M-H]-	321.2	221
1022	EICO	15-HETrE	0.00443586	nmol/mL	Negative	[M-H]-	321.2	221
1023	EICO	15-HETrE	0.0041594	nmol/mL	Negative	[M-H]-	321.2	221
1024	EICO	15-HETrE	0.00314018	nmol/mL	Negative	[M-H]-	321.2	221
1026	EICO	15-HETrE	0.0041707	nmol/mL	Negative	[M-H]-	321.2	221
1027	EICO	15-HETrE	0.00383817	nmol/mL	Negative	[M-H]-	321.2	221
1030	EICO	15-HETrE	0.00225382	nmol/mL	Negative	[M-H]-	321.2	221
1031	EICO	15-HETrE	0.0062107	nmol/mL	Negative	[M-H]-	321.2	221
1032	EICO	15-HETrE	0.00422774	nmol/mL	Negative	[M-H]-	321.2	221
1033	EICO	15-HETrE	0.00402276	nmol/mL	Negative	[M-H]-	321.2	221
1034	EICO	15-HETrE	0.00495046	nmol/mL	Negative	[M-H]-	321.2	221
1035	EICO	15-HETrE	0.00428974	nmol/mL	Negative	[M-H]-	321.2	221
1036	EICO	15-HETrE	0.00438863	nmol/mL	Negative	[M-H]-	321.2	221
1037	EICO	15-HETrE	0.00239306	nmol/mL	Negative	[M-H]-	321.2	221
1040	EICO	15-HETrE	0.00297781	nmol/mL	Negative	[M-H]-	321.2	221
1042	EICO	15-HETrE	0.00946077	nmol/mL	Negative	[M-H]-	321.2	221
1044	EICO	15-HETrE	0.00452442	nmol/mL	Negative	[M-H]-	321.2	221
1045	EICO	15-HETrE	0.00280155	nmol/mL	Negative	[M-H]-	321.2	221
1046	EICO	15-HETrE	0.00339405	nmol/mL	Negative	[M-H]-	321.2	221
1047	EICO	15-HETrE	0.00388007	nmol/mL	Negative	[M-H]-	321.2	221
1049	EICO	15-HETrE	0.00114988	nmol/mL	Negative	[M-H]-	321.2	221
1051	EICO	15-HETrE	0.00339924	nmol/mL	Negative	[M-H]-	321.2	221
1052	EICO	15-HETrE	0.00218556	nmol/mL	Negative	[M-H]-	321.2	221
1053	EICO	15-HETrE	0.00195208	nmol/mL	Negative	[M-H]-	321.2	221
1056	EICO	15-HETrE	0.00459275	nmol/mL	Negative	[M-H]-	321.2	221
1057	EICO	15-HETrE	0.00339744	nmol/mL	Negative	[M-H]-	321.2	221
1061	EICO	15-HETrE	0.0051548	nmol/mL	Negative	[M-H]-	321.2	221
2001	EICO	15-HETrE	0.00222741	nmol/mL	Negative	[M-H]-	321.2	221
2004	EICO	15-HETrE	0.00127144	nmol/mL	Negative	[M-H]-	321.2	221
2005	EICO	15-HETrE	0.00158375	nmol/mL	Negative	[M-H]-	321.2	221
2008	EICO	15-HETrE	0.00254452	nmol/mL	Negative	[M-H]-	321.2	221
2012	EICO	15-HETrE	0.00164935	nmol/mL	Negative	[M-H]-	321.2	221
2013	EICO	15-HETrE	0.00493699	nmol/mL	Negative	[M-H]-	321.2	221
2014	EICO	15-HETrE	0.0039931	nmol/mL	Negative	[M-H]-	321.2	221
2015	EICO	15-HETrE	0.00281545	nmol/mL	Negative	[M-H]-	321.2	221
2019	EICO	15-HETrE	0.00249304	nmol/mL	Negative	[M-H]-	321.2	221
2020	EICO	15-HETrE	0.00476337	nmol/mL	Negative	[M-H]-	321.2	221
2021	EICO	15-HETrE	0.00117332	nmol/mL	Negative	[M-H]-	321.2	221
2022	EICO	15-HETrE	0.00166152	nmol/mL	Negative	[M-H]-	321.2	221
2023	EICO	15-HETrE	0.0033736	nmol/mL	Negative	[M-H]-	321.2	221
2023	EICO	15-HETrE	0.0033736	nmol/mL	Negative	[M-H]-	321.2	221
2024	EICO	15-HETrE	0.00373679	nmol/mL	Negative	[M-H]-	321.2	221
2025	EICO	15-HETrE	0.00189881	nmol/mL	Negative	[M-H]-	321.2	221
2026	EICO	15-HETrE	0.00297596	nmol/mL	Negative	[M-H]-	321.2	221
2027	EICO	15-HETrE	0.00547046	nmol/mL	Negative	[M-H]-	321.2	221
2028	EICO	15-HETrE	0.00219393	nmol/mL	Negative	[M-H]-	321.2	221
2029	EICO	15-HETrE	0.00301569	nmol/mL	Negative	[M-H]-	321.2	221
2030	EICO	15-HETrE	0.00190021	nmol/mL	Negative	[M-H]-	321.2	221
2031	EICO	15-HETrE	0.00218163	nmol/mL	Negative	[M-H]-	321.2	221
2034	EICO	15-HETrE	0.00280598	nmol/mL	Negative	[M-H]-	321.2	221
2035	EICO	15-HETrE	0.00169347	nmol/mL	Negative	[M-H]-	321.2	221
2036	EICO	15-HETrE	0.00149931	nmol/mL	Negative	[M-H]-	321.2	221
2037	EICO	15-HETrE	0.00208653	nmol/mL	Negative	[M-H]-	321.2	221
2038	EICO	15-HETrE	0.00482146	nmol/mL	Negative	[M-H]-	321.2	221
2041	EICO	15-HETrE	0.00268505	nmol/mL	Negative	[M-H]-	321.2	221
2044	EICO	15-HETrE	0.00114791	nmol/mL	Negative	[M-H]-	321.2	221
2045	EICO	15-HETrE	0.00214306	nmol/mL	Negative	[M-H]-	321.2	221
2047	EICO	15-HETrE	0.0035646	nmol/mL	Negative	[M-H]-	321.2	221
2049	EICO	15-HETrE	0.0012405	nmol/mL	Negative	[M-H]-	321.2	221
2051	EICO	15-HETrE	0.00209821	nmol/mL	Negative	[M-H]-	321.2	221
2052	EICO	15-HETrE	0.00301858	nmol/mL	Negative	[M-H]-	321.2	221
2054	EICO	15-HETrE	0.00203239	nmol/mL	Negative	[M-H]-	321.2	221
2055	EICO	15-HETrE	0.00112412	nmol/mL	Negative	[M-H]-	321.2	221
2056	EICO	15-HETrE	0.00165016	nmol/mL	Negative	[M-H]-	321.2	221
2058	EICO	15-HETrE	0.00111116	nmol/mL	Negative	[M-H]-	321.2	221
2060	EICO	15-HETrE	0.00499483	nmol/mL	Negative	[M-H]-	321.2	221
2061	EICO	15-HETrE	0.00403587	nmol/mL	Negative	[M-H]-	321.2	221
2064	EICO	15-HETrE	0.00225929	nmol/mL	Negative	[M-H]-	321.2	221
3001	EICO	15-HETrE	0.00179655	nmol/mL	Negative	[M-H]-	321.2	221
3002	EICO	15-HETrE	0.00594475	nmol/mL	Negative	[M-H]-	321.2	221
3003	EICO	15-HETrE	0.00333477	nmol/mL	Negative	[M-H]-	321.2	221
3004	EICO	15-HETrE	0.00573505	nmol/mL	Negative	[M-H]-	321.2	221
3005	EICO	15-HETrE	0.00697237	nmol/mL	Negative	[M-H]-	321.2	221
3006	EICO	15-HETrE	0.00413204	nmol/mL	Negative	[M-H]-	321.2	221
3007	EICO	15-HETrE	0.00117497	nmol/mL	Negative	[M-H]-	321.2	221
3008	EICO	15-HETrE	0.00429687	nmol/mL	Negative	[M-H]-	321.2	221
3009	EICO	15-HETrE	0.00387014	nmol/mL	Negative	[M-H]-	321.2	221
3012	EICO	15-HETrE	0.00246373	nmol/mL	Negative	[M-H]-	321.2	221
3014	EICO	15-HETrE	0.0017756	nmol/mL	Negative	[M-H]-	321.2	221
3016	EICO	15-HETrE	0.00298895	nmol/mL	Negative	[M-H]-	321.2	221
3018	EICO	15-HETrE	0.00225639	nmol/mL	Negative	[M-H]-	321.2	221
3019	EICO	15-HETrE	0.00305821	nmol/mL	Negative	[M-H]-	321.2	221
3021	EICO	15-HETrE	0.00259099	nmol/mL	Negative	[M-H]-	321.2	221
3022	EICO	15-HETrE	0.00323939	nmol/mL	Negative	[M-H]-	321.2	221
3024	EICO	15-HETrE	0.00374305	nmol/mL	Negative	[M-H]-	321.2	221
3025	EICO	15-HETrE	0.00385424	nmol/mL	Negative	[M-H]-	321.2	221
3026	EICO	15-HETrE	0.00816944	nmol/mL	Negative	[M-H]-	321.2	221
3028	EICO	15-HETrE	0.00527934	nmol/mL	Negative	[M-H]-	321.2	221
3029	EICO	15-HETrE	0.00382131	nmol/mL	Negative	[M-H]-	321.2	221
3030	EICO	15-HETrE	0.00422425	nmol/mL	Negative	[M-H]-	321.2	221
3031	EICO	15-HETrE	0.00236385	nmol/mL	Negative	[M-H]-	321.2	221
3034	EICO	15-HETrE	0.00125985	nmol/mL	Negative	[M-H]-	321.2	221
3035	EICO	15-HETrE	0.00186964	nmol/mL	Negative	[M-H]-	321.2	221
3037	EICO	15-HETrE	0.00322651	nmol/mL	Negative	[M-H]-	321.2	221
3039	EICO	15-HETrE	0.00418594	nmol/mL	Negative	[M-H]-	321.2	221
3040	EICO	15-HETrE	0.00203271	nmol/mL	Negative	[M-H]-	321.2	221
3042	EICO	15-HETrE	0.00301808	nmol/mL	Negative	[M-H]-	321.2	221
3045	EICO	15-HETrE	0.0014856	nmol/mL	Negative	[M-H]-	321.2	221
3046	EICO	15-HETrE	0.0021299	nmol/mL	Negative	[M-H]-	321.2	221
3047	EICO	15-HETrE	0.00271542	nmol/mL	Negative	[M-H]-	321.2	221
3049	EICO	15-HETrE	0.00413511	nmol/mL	Negative	[M-H]-	321.2	221
3051	EICO	15-HETrE	0.00230303	nmol/mL	Negative	[M-H]-	321.2	221
3055	EICO	15-HETrE	0.00522867	nmol/mL	Negative	[M-H]-	321.2	221
3059	EICO	15-HETrE	0.00110183	nmol/mL	Negative	[M-H]-	321.2	221
3060	EICO	15-HETrE	0.00389256	nmol/mL	Negative	[M-H]-	321.2	221
3061	EICO	15-HETrE	0.00264742	nmol/mL	Negative	[M-H]-	321.2	221
3064	EICO	15-HETrE	0.00279694	nmol/mL	Negative	[M-H]-	321.2	221
3065	EICO	15-HETrE	0.00318275	nmol/mL	Negative	[M-H]-	321.2	221
4002	EICO	15-HETrE	0.002503	nmol/mL	Negative	[M-H]-	321.2	221
4003	EICO	15-HETrE	0.00169779	nmol/mL	Negative	[M-H]-	321.2	221
4004	EICO	15-HETrE	0.003192	nmol/mL	Negative	[M-H]-	321.2	221
4005	EICO	15-HETrE	0.0109	nmol/mL	Negative	[M-H]-	321.2	221
4007	EICO	15-HETrE	0.00169629	nmol/mL	Negative	[M-H]-	321.2	221
4008	EICO	15-HETrE	0.00279675	nmol/mL	Negative	[M-H]-	321.2	221
4009	EICO	15-HETrE	0.00168126	nmol/mL	Negative	[M-H]-	321.2	221
4011	EICO	15-HETrE	0.00302061	nmol/mL	Negative	[M-H]-	321.2	221
4012	EICO	15-HETrE	0.00279075	nmol/mL	Negative	[M-H]-	321.2	221
4015	EICO	15-HETrE	0.00197491	nmol/mL	Negative	[M-H]-	321.2	221
4017	EICO	15-HETrE	0.00396789	nmol/mL	Negative	[M-H]-	321.2	221
4019	EICO	15-HETrE	0.00312271	nmol/mL	Negative	[M-H]-	321.2	221
4022	EICO	15-HETrE	0.00087356	nmol/mL	Negative	[M-H]-	321.2	221
4025	EICO	15-HETrE	0.00254322	nmol/mL	Negative	[M-H]-	321.2	221
4026	EICO	15-HETrE	0.00257413	nmol/mL	Negative	[M-H]-	321.2	221
4027	EICO	15-HETrE	0.00285238	nmol/mL	Negative	[M-H]-	321.2	221
4028	EICO	15-HETrE	0.00260603	nmol/mL	Negative	[M-H]-	321.2	221
4030	EICO	15-HETrE	0.00308728	nmol/mL	Negative	[M-H]-	321.2	221
4031	EICO	15-HETrE	0.00186286	nmol/mL	Negative	[M-H]-	321.2	221
4032	EICO	15-HETrE	0.00214533	nmol/mL	Negative	[M-H]-	321.2	221
4034	EICO	15-HETrE	0.00240135	nmol/mL	Negative	[M-H]-	321.2	221
4035	EICO	15-HETrE	0.00403235	nmol/mL	Negative	[M-H]-	321.2	221
4037	EICO	15-HETrE	0.00329818	nmol/mL	Negative	[M-H]-	321.2	221
4039	EICO	15-HETrE	0.00336171	nmol/mL	Negative	[M-H]-	321.2	221
4040	EICO	15-HETrE	0.00423478	nmol/mL	Negative	[M-H]-	321.2	221
4041	EICO	15-HETrE	0.00324767	nmol/mL	Negative	[M-H]-	321.2	221
4042	EICO	15-HETrE	0.00310112	nmol/mL	Negative	[M-H]-	321.2	221
4043	EICO	15-HETrE	0.00165881	nmol/mL	Negative	[M-H]-	321.2	221
4045	EICO	15-HETrE	0.00219823	nmol/mL	Negative	[M-H]-	321.2	221
4046	EICO	15-HETrE	0.00210134	nmol/mL	Negative	[M-H]-	321.2	221
4047	EICO	15-HETrE	0.00473149	nmol/mL	Negative	[M-H]-	321.2	221
4048	EICO	15-HETrE	0.00450814	nmol/mL	Negative	[M-H]-	321.2	221
4049	EICO	15-HETrE	0.00299529	nmol/mL	Negative	[M-H]-	321.2	221
4050	EICO	15-HETrE	0.00252534	nmol/mL	Negative	[M-H]-	321.2	221
4052	EICO	15-HETrE	0.00236384	nmol/mL	Negative	[M-H]-	321.2	221
4054	EICO	15-HETrE	0.000826404	nmol/mL	Negative	[M-H]-	321.2	221
4055	EICO	15-HETrE	0.00274973	nmol/mL	Negative	[M-H]-	321.2	221
4056	EICO	15-HETrE	0.00264273	nmol/mL	Negative	[M-H]-	321.2	221
4057	EICO	15-HETrE	0.00408945	nmol/mL	Negative	[M-H]-	321.2	221
4061	EICO	15-HETrE	0.00260221	nmol/mL	Negative	[M-H]-	321.2	221
1001	EICO	5_6-DHET	0.0016974	nmol/mL	Negative	[M-H]-	337.2	145
1003	EICO	5_6-DHET	0.00685122	nmol/mL	Negative	[M-H]-	337.2	145
1004	EICO	5_6-DHET	0.00139701	nmol/mL	Negative	[M-H]-	337.2	145
1005	EICO	5_6-DHET	0.00169989	nmol/mL	Negative	[M-H]-	337.2	145
1006	EICO	5_6-DHET	0.00115254	nmol/mL	Negative	[M-H]-	337.2	145
1007	EICO	5_6-DHET	0.000901835	nmol/mL	Negative	[M-H]-	337.2	145
1011	EICO	5_6-DHET	0.000676689	nmol/mL	Negative	[M-H]-	337.2	145
1012	EICO	5_6-DHET	0.000707374	nmol/mL	Negative	[M-H]-	337.2	145
1013	EICO	5_6-DHET	0.00213504	nmol/mL	Negative	[M-H]-	337.2	145
1015	EICO	5_6-DHET	0.00137627	nmol/mL	Negative	[M-H]-	337.2	145
1017	EICO	5_6-DHET	0.00764726	nmol/mL	Negative	[M-H]-	337.2	145
1018	EICO	5_6-DHET	0.00102523	nmol/mL	Negative	[M-H]-	337.2	145
1019	EICO	5_6-DHET	0.00183419	nmol/mL	Negative	[M-H]-	337.2	145
1020	EICO	5_6-DHET	0.00242404	nmol/mL	Negative	[M-H]-	337.2	145
1022	EICO	5_6-DHET	0.000987977	nmol/mL	Negative	[M-H]-	337.2	145
1023	EICO	5_6-DHET	0.00164584	nmol/mL	Negative	[M-H]-	337.2	145
1024	EICO	5_6-DHET	0.000677184	nmol/mL	Negative	[M-H]-	337.2	145
1026	EICO	5_6-DHET	0.00140359	nmol/mL	Negative	[M-H]-	337.2	145
1027	EICO	5_6-DHET	0.00191011	nmol/mL	Negative	[M-H]-	337.2	145
1030	EICO	5_6-DHET	0.0016831	nmol/mL	Negative	[M-H]-	337.2	145
1031	EICO	5_6-DHET	0.00192468	nmol/mL	Negative	[M-H]-	337.2	145
1032	EICO	5_6-DHET	0.00177763	nmol/mL	Negative	[M-H]-	337.2	145
1033	EICO	5_6-DHET	0.00107155	nmol/mL	Negative	[M-H]-	337.2	145
1034	EICO	5_6-DHET	0.00178328	nmol/mL	Negative	[M-H]-	337.2	145
1035	EICO	5_6-DHET	0.00131118	nmol/mL	Negative	[M-H]-	337.2	145
1036	EICO	5_6-DHET	0.00323595	nmol/mL	Negative	[M-H]-	337.2	145
1037	EICO	5_6-DHET	0.00172002	nmol/mL	Negative	[M-H]-	337.2	145
1040	EICO	5_6-DHET	0.00141823	nmol/mL	Negative	[M-H]-	337.2	145
1042	EICO	5_6-DHET	0.00352751	nmol/mL	Negative	[M-H]-	337.2	145
1044	EICO	5_6-DHET	0.00325534	nmol/mL	Negative	[M-H]-	337.2	145
1045	EICO	5_6-DHET	0.00203758	nmol/mL	Negative	[M-H]-	337.2	145
1046	EICO	5_6-DHET	0.00185648	nmol/mL	Negative	[M-H]-	337.2	145
1047	EICO	5_6-DHET	0.0021586	nmol/mL	Negative	[M-H]-	337.2	145
1049	EICO	5_6-DHET	0.00163733	nmol/mL	Negative	[M-H]-	337.2	145
1051	EICO	5_6-DHET	0.00108546	nmol/mL	Negative	[M-H]-	337.2	145
1052	EICO	5_6-DHET	0.00108256	nmol/mL	Negative	[M-H]-	337.2	145
1053	EICO	5_6-DHET	0.00158973	nmol/mL	Negative	[M-H]-	337.2	145
1056	EICO	5_6-DHET	0.00238653	nmol/mL	Negative	[M-H]-	337.2	145
1057	EICO	5_6-DHET	0.00178664	nmol/mL	Negative	[M-H]-	337.2	145
1061	EICO	5_6-DHET	0.00141637	nmol/mL	Negative	[M-H]-	337.2	145
2001	EICO	5_6-DHET	0.00124535	nmol/mL	Negative	[M-H]-	337.2	145
2004	EICO	5_6-DHET	0.00165418	nmol/mL	Negative	[M-H]-	337.2	145
2005	EICO	5_6-DHET	0.00122124	nmol/mL	Negative	[M-H]-	337.2	145
2008	EICO	5_6-DHET	0.000734128	nmol/mL	Negative	[M-H]-	337.2	145
2012	EICO	5_6-DHET	0.00124889	nmol/mL	Negative	[M-H]-	337.2	145
2013	EICO	5_6-DHET	0.00209339	nmol/mL	Negative	[M-H]-	337.2	145
2014	EICO	5_6-DHET	0.00105952	nmol/mL	Negative	[M-H]-	337.2	145
2015	EICO	5_6-DHET	0.00068696	nmol/mL	Negative	[M-H]-	337.2	145
2019	EICO	5_6-DHET	0.00154378	nmol/mL	Negative	[M-H]-	337.2	145
2020	EICO	5_6-DHET	0.0041691	nmol/mL	Negative	[M-H]-	337.2	145
2021	EICO	5_6-DHET	0.00166598	nmol/mL	Negative	[M-H]-	337.2	145
2022	EICO	5_6-DHET	0.00120587	nmol/mL	Negative	[M-H]-	337.2	145
2023	EICO	5_6-DHET	0.00183064	nmol/mL	Negative	[M-H]-	337.2	145
2023	EICO	5_6-DHET	0.00183064	nmol/mL	Negative	[M-H]-	337.2	145
2024	EICO	5_6-DHET	0.000692066	nmol/mL	Negative	[M-H]-	337.2	145
2025	EICO	5_6-DHET	0.00148516	nmol/mL	Negative	[M-H]-	337.2	145
2026	EICO	5_6-DHET	0.00178047	nmol/mL	Negative	[M-H]-	337.2	145
2027	EICO	5_6-DHET	0.00191297	nmol/mL	Negative	[M-H]-	337.2	145
2028	EICO	5_6-DHET	0.000812437	nmol/mL	Negative	[M-H]-	337.2	145
2029	EICO	5_6-DHET	0.00189377	nmol/mL	Negative	[M-H]-	337.2	145
2030	EICO	5_6-DHET	0.00137312	nmol/mL	Negative	[M-H]-	337.2	145
2031	EICO	5_6-DHET	0.00220512	nmol/mL	Negative	[M-H]-	337.2	145
2034	EICO	5_6-DHET	0.00159305	nmol/mL	Negative	[M-H]-	337.2	145
2035	EICO	5_6-DHET	0.000671164	nmol/mL	Negative	[M-H]-	337.2	145
2036	EICO	5_6-DHET	0.00114999	nmol/mL	Negative	[M-H]-	337.2	145
2037	EICO	5_6-DHET	0.00195109	nmol/mL	Negative	[M-H]-	337.2	145
2038	EICO	5_6-DHET	0.000880461	nmol/mL	Negative	[M-H]-	337.2	145
2041	EICO	5_6-DHET	0.00184005	nmol/mL	Negative	[M-H]-	337.2	145
2044	EICO	5_6-DHET	0.00346227	nmol/mL	Negative	[M-H]-	337.2	145
2045	EICO	5_6-DHET	0.00126956	nmol/mL	Negative	[M-H]-	337.2	145
2047	EICO	5_6-DHET	0.00188764	nmol/mL	Negative	[M-H]-	337.2	145
2049	EICO	5_6-DHET	0.00164838	nmol/mL	Negative	[M-H]-	337.2	145
2051	EICO	5_6-DHET	0.000843679	nmol/mL	Negative	[M-H]-	337.2	145
2052	EICO	5_6-DHET	0.00198131	nmol/mL	Negative	[M-H]-	337.2	145
2054	EICO	5_6-DHET	0.000931588	nmol/mL	Negative	[M-H]-	337.2	145
2055	EICO	5_6-DHET	0.000857354	nmol/mL	Negative	[M-H]-	337.2	145
2056	EICO	5_6-DHET	0.000708778	nmol/mL	Negative	[M-H]-	337.2	145
2058	EICO	5_6-DHET	0.00053915	nmol/mL	Negative	[M-H]-	337.2	145
2060	EICO	5_6-DHET	0.000642012	nmol/mL	Negative	[M-H]-	337.2	145
2061	EICO	5_6-DHET	0.00303218	nmol/mL	Negative	[M-H]-	337.2	145
2064	EICO	5_6-DHET	0.00124654	nmol/mL	Negative	[M-H]-	337.2	145
3001	EICO	5_6-DHET	0.000772971	nmol/mL	Negative	[M-H]-	337.2	145
3002	EICO	5_6-DHET	0.00525586	nmol/mL	Negative	[M-H]-	337.2	145
3003	EICO	5_6-DHET	0.0036488	nmol/mL	Negative	[M-H]-	337.2	145
3004	EICO	5_6-DHET	0.0018722	nmol/mL	Negative	[M-H]-	337.2	145
3005	EICO	5_6-DHET	0.00509329	nmol/mL	Negative	[M-H]-	337.2	145
3006	EICO	5_6-DHET	0.00215386	nmol/mL	Negative	[M-H]-	337.2	145
3007	EICO	5_6-DHET	0.00227776	nmol/mL	Negative	[M-H]-	337.2	145
3008	EICO	5_6-DHET	0.00216998	nmol/mL	Negative	[M-H]-	337.2	145
3009	EICO	5_6-DHET	0.00189584	nmol/mL	Negative	[M-H]-	337.2	145
3012	EICO	5_6-DHET	0.00140482	nmol/mL	Negative	[M-H]-	337.2	145
3014	EICO	5_6-DHET	0.000571519	nmol/mL	Negative	[M-H]-	337.2	145
3016	EICO	5_6-DHET	0.00228381	nmol/mL	Negative	[M-H]-	337.2	145
3018	EICO	5_6-DHET	0.00112927	nmol/mL	Negative	[M-H]-	337.2	145
3019	EICO	5_6-DHET	0.000696609	nmol/mL	Negative	[M-H]-	337.2	145
3021	EICO	5_6-DHET	0.000460174	nmol/mL	Negative	[M-H]-	337.2	145
3022	EICO	5_6-DHET	0.00279567	nmol/mL	Negative	[M-H]-	337.2	145
3024	EICO	5_6-DHET	0.00103267	nmol/mL	Negative	[M-H]-	337.2	145
3025	EICO	5_6-DHET	0.000975447	nmol/mL	Negative	[M-H]-	337.2	145
3026	EICO	5_6-DHET	0.00280957	nmol/mL	Negative	[M-H]-	337.2	145
3028	EICO	5_6-DHET	0.00298961	nmol/mL	Negative	[M-H]-	337.2	145
3029	EICO	5_6-DHET	0.00420713	nmol/mL	Negative	[M-H]-	337.2	145
3030	EICO	5_6-DHET	0.00303165	nmol/mL	Negative	[M-H]-	337.2	145
3031	EICO	5_6-DHET	0.000713224	nmol/mL	Negative	[M-H]-	337.2	145
3034	EICO	5_6-DHET	0.00118439	nmol/mL	Negative	[M-H]-	337.2	145
3035	EICO	5_6-DHET	0.00117929	nmol/mL	Negative	[M-H]-	337.2	145
3037	EICO	5_6-DHET	0.00320376	nmol/mL	Negative	[M-H]-	337.2	145
3039	EICO	5_6-DHET	0.00250633	nmol/mL	Negative	[M-H]-	337.2	145
3040	EICO	5_6-DHET	0.000943518	nmol/mL	Negative	[M-H]-	337.2	145
3042	EICO	5_6-DHET	0.00179356	nmol/mL	Negative	[M-H]-	337.2	145
3045	EICO	5_6-DHET	0.000861692	nmol/mL	Negative	[M-H]-	337.2	145
3046	EICO	5_6-DHET	0.000973417	nmol/mL	Negative	[M-H]-	337.2	145
3047	EICO	5_6-DHET	0.00306259	nmol/mL	Negative	[M-H]-	337.2	145
3049	EICO	5_6-DHET	0.00315029	nmol/mL	Negative	[M-H]-	337.2	145
3051	EICO	5_6-DHET	0.000732702	nmol/mL	Negative	[M-H]-	337.2	145
3055	EICO	5_6-DHET	0.00169384	nmol/mL	Negative	[M-H]-	337.2	145
3059	EICO	5_6-DHET	0.00135079	nmol/mL	Negative	[M-H]-	337.2	145
3060	EICO	5_6-DHET	0.00232631	nmol/mL	Negative	[M-H]-	337.2	145
3061	EICO	5_6-DHET	0.000739082	nmol/mL	Negative	[M-H]-	337.2	145
3064	EICO	5_6-DHET	0.00279443	nmol/mL	Negative	[M-H]-	337.2	145
3065	EICO	5_6-DHET	0.000946701	nmol/mL	Negative	[M-H]-	337.2	145
4002	EICO	5_6-DHET	0.000756684	nmol/mL	Negative	[M-H]-	337.2	145
4003	EICO	5_6-DHET	0.0025215	nmol/mL	Negative	[M-H]-	337.2	145
4004	EICO	5_6-DHET	0.000852609	nmol/mL	Negative	[M-H]-	337.2	145
4005	EICO	5_6-DHET	0.00332175	nmol/mL	Negative	[M-H]-	337.2	145
4007	EICO	5_6-DHET	0.00136389	nmol/mL	Negative	[M-H]-	337.2	145
4008	EICO	5_6-DHET	0.00138839	nmol/mL	Negative	[M-H]-	337.2	145
4009	EICO	5_6-DHET	0.00100706	nmol/mL	Negative	[M-H]-	337.2	145
4011	EICO	5_6-DHET	0.00143941	nmol/mL	Negative	[M-H]-	337.2	145
4012	EICO	5_6-DHET	0.00289902	nmol/mL	Negative	[M-H]-	337.2	145
4015	EICO	5_6-DHET	0.000723869	nmol/mL	Negative	[M-H]-	337.2	145
4017	EICO	5_6-DHET	0.0012817	nmol/mL	Negative	[M-H]-	337.2	145
4019	EICO	5_6-DHET	0.00203901	nmol/mL	Negative	[M-H]-	337.2	145
4022	EICO	5_6-DHET	0.000983645	nmol/mL	Negative	[M-H]-	337.2	145
4025	EICO	5_6-DHET	0.00128658	nmol/mL	Negative	[M-H]-	337.2	145
4026	EICO	5_6-DHET	0.00198611	nmol/mL	Negative	[M-H]-	337.2	145
4027	EICO	5_6-DHET	0.00192034	nmol/mL	Negative	[M-H]-	337.2	145
4028	EICO	5_6-DHET	0.00115431	nmol/mL	Negative	[M-H]-	337.2	145
4030	EICO	5_6-DHET	0.00184387	nmol/mL	Negative	[M-H]-	337.2	145
4031	EICO	5_6-DHET	0.0012282	nmol/mL	Negative	[M-H]-	337.2	145
4032	EICO	5_6-DHET	0.000730473	nmol/mL	Negative	[M-H]-	337.2	145
4034	EICO	5_6-DHET	0.00193056	nmol/mL	Negative	[M-H]-	337.2	145
4035	EICO	5_6-DHET	0.00356451	nmol/mL	Negative	[M-H]-	337.2	145
4037	EICO	5_6-DHET	0.00186398	nmol/mL	Negative	[M-H]-	337.2	145
4039	EICO	5_6-DHET	0.00146805	nmol/mL	Negative	[M-H]-	337.2	145
4040	EICO	5_6-DHET	0.000391186	nmol/mL	Negative	[M-H]-	337.2	145
4041	EICO	5_6-DHET	0.000951022	nmol/mL	Negative	[M-H]-	337.2	145
4042	EICO	5_6-DHET	0.00149495	nmol/mL	Negative	[M-H]-	337.2	145
4043	EICO	5_6-DHET	0.000641129	nmol/mL	Negative	[M-H]-	337.2	145
4045	EICO	5_6-DHET	0.00134741	nmol/mL	Negative	[M-H]-	337.2	145
4046	EICO	5_6-DHET	0.00141629	nmol/mL	Negative	[M-H]-	337.2	145
4047	EICO	5_6-DHET	0.00219894	nmol/mL	Negative	[M-H]-	337.2	145
4048	EICO	5_6-DHET	0.00675671	nmol/mL	Negative	[M-H]-	337.2	145
4049	EICO	5_6-DHET	0.00111625	nmol/mL	Negative	[M-H]-	337.2	145
4050	EICO	5_6-DHET	0.00207862	nmol/mL	Negative	[M-H]-	337.2	145
4052	EICO	5_6-DHET	0.0013675	nmol/mL	Negative	[M-H]-	337.2	145
4054	EICO	5_6-DHET	0.0010059	nmol/mL	Negative	[M-H]-	337.2	145
4055	EICO	5_6-DHET	0.000904173	nmol/mL	Negative	[M-H]-	337.2	145
4056	EICO	5_6-DHET	0.00110547	nmol/mL	Negative	[M-H]-	337.2	145
4057	EICO	5_6-DHET	0.00170642	nmol/mL	Negative	[M-H]-	337.2	145
4061	EICO	5_6-DHET	0.000865897	nmol/mL	Negative	[M-H]-	337.2	145
1001	EICO	5-HEPE	0.00126881	nmol/mL	Negative	[M-H]-	317.2	114.9
1003	EICO	5-HEPE	0.00430931	nmol/mL	Negative	[M-H]-	317.2	114.9
1004	EICO	5-HEPE	0.000507583	nmol/mL	Negative	[M-H]-	317.2	114.9
1005	EICO	5-HEPE	0.00132297	nmol/mL	Negative	[M-H]-	317.2	114.9
1006	EICO	5-HEPE	0.0023281	nmol/mL	Negative	[M-H]-	317.2	114.9
1007	EICO	5-HEPE	0.00140359	nmol/mL	Negative	[M-H]-	317.2	114.9
1011	EICO	5-HEPE	0.000984927	nmol/mL	Negative	[M-H]-	317.2	114.9
1012	EICO	5-HEPE	0.000527296	nmol/mL	Negative	[M-H]-	317.2	114.9
1013	EICO	5-HEPE	0.00109764	nmol/mL	Negative	[M-H]-	317.2	114.9
1015	EICO	5-HEPE	0.000239139	nmol/mL	Negative	[M-H]-	317.2	114.9
1017	EICO	5-HEPE	0.00212217	nmol/mL	Negative	[M-H]-	317.2	114.9
1018	EICO	5-HEPE	0.000965554	nmol/mL	Negative	[M-H]-	317.2	114.9
1019	EICO	5-HEPE	0.000871024	nmol/mL	Negative	[M-H]-	317.2	114.9
1020	EICO	5-HEPE	0.00175026	nmol/mL	Negative	[M-H]-	317.2	114.9
1022	EICO	5-HEPE	0.00163203	nmol/mL	Negative	[M-H]-	317.2	114.9
1023	EICO	5-HEPE	0.00239268	nmol/mL	Negative	[M-H]-	317.2	114.9
1024	EICO	5-HEPE	0.000901832	nmol/mL	Negative	[M-H]-	317.2	114.9
1026	EICO	5-HEPE	0.0012536	nmol/mL	Negative	[M-H]-	317.2	114.9
1027	EICO	5-HEPE	0.00121828	nmol/mL	Negative	[M-H]-	317.2	114.9
1030	EICO	5-HEPE	0.000466064	nmol/mL	Negative	[M-H]-	317.2	114.9
1031	EICO	5-HEPE	0.000581887	nmol/mL	Negative	[M-H]-	317.2	114.9
1032	EICO	5-HEPE	0.00110248	nmol/mL	Negative	[M-H]-	317.2	114.9
1033	EICO	5-HEPE	0.00122568	nmol/mL	Negative	[M-H]-	317.2	114.9
1034	EICO	5-HEPE	0.00184513	nmol/mL	Negative	[M-H]-	317.2	114.9
1035	EICO	5-HEPE	0.00111121	nmol/mL	Negative	[M-H]-	317.2	114.9
1036	EICO	5-HEPE	0.000700051	nmol/mL	Negative	[M-H]-	317.2	114.9
1037	EICO	5-HEPE	0.00076903	nmol/mL	Negative	[M-H]-	317.2	114.9
1040	EICO	5-HEPE	0.00151565	nmol/mL	Negative	[M-H]-	317.2	114.9
1042	EICO	5-HEPE	0.0039199	nmol/mL	Negative	[M-H]-	317.2	114.9
1044	EICO	5-HEPE	0.00314854	nmol/mL	Negative	[M-H]-	317.2	114.9
1045	EICO	5-HEPE	0.00107191	nmol/mL	Negative	[M-H]-	317.2	114.9
1046	EICO	5-HEPE	0.0021826	nmol/mL	Negative	[M-H]-	317.2	114.9
1047	EICO	5-HEPE	0.00149171	nmol/mL	Negative	[M-H]-	317.2	114.9
1049	EICO	5-HEPE	0.000829426	nmol/mL	Negative	[M-H]-	317.2	114.9
1051	EICO	5-HEPE	0.00160578	nmol/mL	Negative	[M-H]-	317.2	114.9
1052	EICO	5-HEPE	0.000759202	nmol/mL	Negative	[M-H]-	317.2	114.9
1053	EICO	5-HEPE	0.00283257	nmol/mL	Negative	[M-H]-	317.2	114.9
1056	EICO	5-HEPE	0.00512698	nmol/mL	Negative	[M-H]-	317.2	114.9
1057	EICO	5-HEPE	0.0020384	nmol/mL	Negative	[M-H]-	317.2	114.9
1061	EICO	5-HEPE	0.00209055	nmol/mL	Negative	[M-H]-	317.2	114.9
2001	EICO	5-HEPE	0.00103986	nmol/mL	Negative	[M-H]-	317.2	114.9
2004	EICO	5-HEPE	0.000911229	nmol/mL	Negative	[M-H]-	317.2	114.9
2005	EICO	5-HEPE	0.000401547	nmol/mL	Negative	[M-H]-	317.2	114.9
2008	EICO	5-HEPE	0.000271794	nmol/mL	Negative	[M-H]-	317.2	114.9
2012	EICO	5-HEPE	0.00116667	nmol/mL	Negative	[M-H]-	317.2	114.9
2013	EICO	5-HEPE	0.0031703	nmol/mL	Negative	[M-H]-	317.2	114.9
2014	EICO	5-HEPE	0.000248328	nmol/mL	Negative	[M-H]-	317.2	114.9
2015	EICO	5-HEPE	0.000732441	nmol/mL	Negative	[M-H]-	317.2	114.9
2019	EICO	5-HEPE	0.00154601	nmol/mL	Negative	[M-H]-	317.2	114.9
2020	EICO	5-HEPE	0.00253024	nmol/mL	Negative	[M-H]-	317.2	114.9
2021	EICO	5-HEPE	0.000395498	nmol/mL	Negative	[M-H]-	317.2	114.9
2022	EICO	5-HEPE	0.00200416	nmol/mL	Negative	[M-H]-	317.2	114.9
2023	EICO	5-HEPE	0.00144341	nmol/mL	Negative	[M-H]-	317.2	114.9
2023	EICO	5-HEPE	0.00144341	nmol/mL	Negative	[M-H]-	317.2	114.9
2024	EICO	5-HEPE	0.0014426	nmol/mL	Negative	[M-H]-	317.2	114.9
2025	EICO	5-HEPE	0.00113282	nmol/mL	Negative	[M-H]-	317.2	114.9
2026	EICO	5-HEPE	0.00161677	nmol/mL	Negative	[M-H]-	317.2	114.9
2027	EICO	5-HEPE	0.00196282	nmol/mL	Negative	[M-H]-	317.2	114.9
2028	EICO	5-HEPE	0.000933083	nmol/mL	Negative	[M-H]-	317.2	114.9
2029	EICO	5-HEPE	0.0034313	nmol/mL	Negative	[M-H]-	317.2	114.9
2030	EICO	5-HEPE	0.00130128	nmol/mL	Negative	[M-H]-	317.2	114.9
2031	EICO	5-HEPE	0.00324682	nmol/mL	Negative	[M-H]-	317.2	114.9
2034	EICO	5-HEPE	0.00112543	nmol/mL	Negative	[M-H]-	317.2	114.9
2035	EICO	5-HEPE	0.00179287	nmol/mL	Negative	[M-H]-	317.2	114.9
2036	EICO	5-HEPE	0.0016112	nmol/mL	Negative	[M-H]-	317.2	114.9
2037	EICO	5-HEPE	0.00142316	nmol/mL	Negative	[M-H]-	317.2	114.9
2038	EICO	5-HEPE	0.00207436	nmol/mL	Negative	[M-H]-	317.2	114.9
2041	EICO	5-HEPE	0.000761028	nmol/mL	Negative	[M-H]-	317.2	114.9
2044	EICO	5-HEPE	0.0010208	nmol/mL	Negative	[M-H]-	317.2	114.9
2045	EICO	5-HEPE	0.00229794	nmol/mL	Negative	[M-H]-	317.2	114.9
2047	EICO	5-HEPE	0.00087218	nmol/mL	Negative	[M-H]-	317.2	114.9
2049	EICO	5-HEPE	0.00141675	nmol/mL	Negative	[M-H]-	317.2	114.9
2051	EICO	5-HEPE	0.000438765	nmol/mL	Negative	[M-H]-	317.2	114.9
2052	EICO	5-HEPE	0.00307686	nmol/mL	Negative	[M-H]-	317.2	114.9
2054	EICO	5-HEPE	0.00122331	nmol/mL	Negative	[M-H]-	317.2	114.9
2055	EICO	5-HEPE	0.000704906	nmol/mL	Negative	[M-H]-	317.2	114.9
2056	EICO	5-HEPE	0.000259661	nmol/mL	Negative	[M-H]-	317.2	114.9
2058	EICO	5-HEPE	0.00127308	nmol/mL	Negative	[M-H]-	317.2	114.9
2060	EICO	5-HEPE	0.00763574	nmol/mL	Negative	[M-H]-	317.2	114.9
2061	EICO	5-HEPE	0.00476754	nmol/mL	Negative	[M-H]-	317.2	114.9
2064	EICO	5-HEPE	0.000873944	nmol/mL	Negative	[M-H]-	317.2	114.9
3001	EICO	5-HEPE	0.000387909	nmol/mL	Negative	[M-H]-	317.2	114.9
3002	EICO	5-HEPE	0.0021282	nmol/mL	Negative	[M-H]-	317.2	114.9
3003	EICO	5-HEPE	0.00398064	nmol/mL	Negative	[M-H]-	317.2	114.9
3004	EICO	5-HEPE	0.00281154	nmol/mL	Negative	[M-H]-	317.2	114.9
3005	EICO	5-HEPE	0.00234337	nmol/mL	Negative	[M-H]-	317.2	114.9
3006	EICO	5-HEPE	0.00254628	nmol/mL	Negative	[M-H]-	317.2	114.9
3007	EICO	5-HEPE	0.000308353	nmol/mL	Negative	[M-H]-	317.2	114.9
3008	EICO	5-HEPE	0.0021225	nmol/mL	Negative	[M-H]-	317.2	114.9
3009	EICO	5-HEPE	0.000832136	nmol/mL	Negative	[M-H]-	317.2	114.9
3012	EICO	5-HEPE	0.00100523	nmol/mL	Negative	[M-H]-	317.2	114.9
3014	EICO	5-HEPE	0.000530516	nmol/mL	Negative	[M-H]-	317.2	114.9
3016	EICO	5-HEPE	0.00191976	nmol/mL	Negative	[M-H]-	317.2	114.9
3018	EICO	5-HEPE	0.00121654	nmol/mL	Negative	[M-H]-	317.2	114.9
3019	EICO	5-HEPE	0.00110415	nmol/mL	Negative	[M-H]-	317.2	114.9
3021	EICO	5-HEPE	0.00220389	nmol/mL	Negative	[M-H]-	317.2	114.9
3022	EICO	5-HEPE	0.00369188	nmol/mL	Negative	[M-H]-	317.2	114.9
3024	EICO	5-HEPE	0.000413312	nmol/mL	Negative	[M-H]-	317.2	114.9
3025	EICO	5-HEPE	0.00205796	nmol/mL	Negative	[M-H]-	317.2	114.9
3026	EICO	5-HEPE	0.00163408	nmol/mL	Negative	[M-H]-	317.2	114.9
3028	EICO	5-HEPE	0.00276619	nmol/mL	Negative	[M-H]-	317.2	114.9
3029	EICO	5-HEPE	0.000787544	nmol/mL	Negative	[M-H]-	317.2	114.9
3030	EICO	5-HEPE	0.00227559	nmol/mL	Negative	[M-H]-	317.2	114.9
3031	EICO	5-HEPE	0.00173214	nmol/mL	Negative	[M-H]-	317.2	114.9
3034	EICO	5-HEPE	0.000989422	nmol/mL	Negative	[M-H]-	317.2	114.9
3035	EICO	5-HEPE	0.000825216	nmol/mL	Negative	[M-H]-	317.2	114.9
3037	EICO	5-HEPE	0.000551869	nmol/mL	Negative	[M-H]-	317.2	114.9
3039	EICO	5-HEPE	0.00167744	nmol/mL	Negative	[M-H]-	317.2	114.9
3040	EICO	5-HEPE	0.00113264	nmol/mL	Negative	[M-H]-	317.2	114.9
3042	EICO	5-HEPE	0.00137744	nmol/mL	Negative	[M-H]-	317.2	114.9
3045	EICO	5-HEPE	0.00103586	nmol/mL	Negative	[M-H]-	317.2	114.9
3046	EICO	5-HEPE	0.000405126	nmol/mL	Negative	[M-H]-	317.2	114.9
3047	EICO	5-HEPE	0.00169144	nmol/mL	Negative	[M-H]-	317.2	114.9
3049	EICO	5-HEPE	0.00173616	nmol/mL	Negative	[M-H]-	317.2	114.9
3051	EICO	5-HEPE	0.000516638	nmol/mL	Negative	[M-H]-	317.2	114.9
3055	EICO	5-HEPE	0.000843389	nmol/mL	Negative	[M-H]-	317.2	114.9
3059	EICO	5-HEPE	0.000944515	nmol/mL	Negative	[M-H]-	317.2	114.9
3060	EICO	5-HEPE	0.0017092	nmol/mL	Negative	[M-H]-	317.2	114.9
3061	EICO	5-HEPE	0.000605729	nmol/mL	Negative	[M-H]-	317.2	114.9
3064	EICO	5-HEPE	0.000756053	nmol/mL	Negative	[M-H]-	317.2	114.9
3065	EICO	5-HEPE	0.00250997	nmol/mL	Negative	[M-H]-	317.2	114.9
4002	EICO	5-HEPE	0.000904167	nmol/mL	Negative	[M-H]-	317.2	114.9
4003	EICO	5-HEPE	0.00139831	nmol/mL	Negative	[M-H]-	317.2	114.9
4004	EICO	5-HEPE	0.00143293	nmol/mL	Negative	[M-H]-	317.2	114.9
4005	EICO	5-HEPE	0.00597205	nmol/mL	Negative	[M-H]-	317.2	114.9
4007	EICO	5-HEPE	0.00147463	nmol/mL	Negative	[M-H]-	317.2	114.9
4008	EICO	5-HEPE	0.00201382	nmol/mL	Negative	[M-H]-	317.2	114.9
4009	EICO	5-HEPE	0.000819693	nmol/mL	Negative	[M-H]-	317.2	114.9
4011	EICO	5-HEPE	0.000762492	nmol/mL	Negative	[M-H]-	317.2	114.9
4012	EICO	5-HEPE	0.00140996	nmol/mL	Negative	[M-H]-	317.2	114.9
4015	EICO	5-HEPE	0.000490114	nmol/mL	Negative	[M-H]-	317.2	114.9
4017	EICO	5-HEPE	0.00146053	nmol/mL	Negative	[M-H]-	317.2	114.9
4019	EICO	5-HEPE	0.00215039	nmol/mL	Negative	[M-H]-	317.2	114.9
4022	EICO	5-HEPE	0.00120818	nmol/mL	Negative	[M-H]-	317.2	114.9
4025	EICO	5-HEPE	0.00253603	nmol/mL	Negative	[M-H]-	317.2	114.9
4026	EICO	5-HEPE	0.00183753	nmol/mL	Negative	[M-H]-	317.2	114.9
4027	EICO	5-HEPE	0.00158472	nmol/mL	Negative	[M-H]-	317.2	114.9
4028	EICO	5-HEPE	0.000882967	nmol/mL	Negative	[M-H]-	317.2	114.9
4030	EICO	5-HEPE	0.00141471	nmol/mL	Negative	[M-H]-	317.2	114.9
4031	EICO	5-HEPE	0.000901977	nmol/mL	Negative	[M-H]-	317.2	114.9
4032	EICO	5-HEPE	0.00119776	nmol/mL	Negative	[M-H]-	317.2	114.9
4034	EICO	5-HEPE	0.00210749	nmol/mL	Negative	[M-H]-	317.2	114.9
4035	EICO	5-HEPE	0.00295211	nmol/mL	Negative	[M-H]-	317.2	114.9
4037	EICO	5-HEPE	0.0023753	nmol/mL	Negative	[M-H]-	317.2	114.9
4039	EICO	5-HEPE	0.000810466	nmol/mL	Negative	[M-H]-	317.2	114.9
4040	EICO	5-HEPE	0.00292436	nmol/mL	Negative	[M-H]-	317.2	114.9
4041	EICO	5-HEPE	0.00210064	nmol/mL	Negative	[M-H]-	317.2	114.9
4042	EICO	5-HEPE	0.00503066	nmol/mL	Negative	[M-H]-	317.2	114.9
4043	EICO	5-HEPE	0.00267338	nmol/mL	Negative	[M-H]-	317.2	114.9
4045	EICO	5-HEPE	0.000571746	nmol/mL	Negative	[M-H]-	317.2	114.9
4046	EICO	5-HEPE	0.00413272	nmol/mL	Negative	[M-H]-	317.2	114.9
4047	EICO	5-HEPE	0.0018591	nmol/mL	Negative	[M-H]-	317.2	114.9
4048	EICO	5-HEPE	0.0023742	nmol/mL	Negative	[M-H]-	317.2	114.9
4049	EICO	5-HEPE	0.000322235	nmol/mL	Negative	[M-H]-	317.2	114.9
4050	EICO	5-HEPE	0.00101544	nmol/mL	Negative	[M-H]-	317.2	114.9
4052	EICO	5-HEPE	0.00178861	nmol/mL	Negative	[M-H]-	317.2	114.9
4054	EICO	5-HEPE	0.00098416	nmol/mL	Negative	[M-H]-	317.2	114.9
4055	EICO	5-HEPE	0.00291594	nmol/mL	Negative	[M-H]-	317.2	114.9
4056	EICO	5-HEPE	0.00160328	nmol/mL	Negative	[M-H]-	317.2	114.9
4057	EICO	5-HEPE	0.00149197	nmol/mL	Negative	[M-H]-	317.2	114.9
4061	EICO	5-HEPE	0.00139901	nmol/mL	Negative	[M-H]-	317.2	114.9
1001	EICO	5-HETrE	0.00600675	nmol/mL	Negative	[M-H]-	321.2	115
1003	EICO	5-HETrE	0.0167515	nmol/mL	Negative	[M-H]-	321.2	115
1004	EICO	5-HETrE	0.00818677	nmol/mL	Negative	[M-H]-	321.2	115
1005	EICO	5-HETrE	0.0136257	nmol/mL	Negative	[M-H]-	321.2	115
1006	EICO	5-HETrE	0.00750073	nmol/mL	Negative	[M-H]-	321.2	115
1007	EICO	5-HETrE	0.00489968	nmol/mL	Negative	[M-H]-	321.2	115
1011	EICO	5-HETrE	0.00568695	nmol/mL	Negative	[M-H]-	321.2	115
1012	EICO	5-HETrE	0.00702765	nmol/mL	Negative	[M-H]-	321.2	115
1013	EICO	5-HETrE	0.00766965	nmol/mL	Negative	[M-H]-	321.2	115
1015	EICO	5-HETrE	0.00378228	nmol/mL	Negative	[M-H]-	321.2	115
1017	EICO	5-HETrE	0.0168654	nmol/mL	Negative	[M-H]-	321.2	115
1018	EICO	5-HETrE	0.00688655	nmol/mL	Negative	[M-H]-	321.2	115
1019	EICO	5-HETrE	0.00842977	nmol/mL	Negative	[M-H]-	321.2	115
1020	EICO	5-HETrE	0.0163589	nmol/mL	Negative	[M-H]-	321.2	115
1022	EICO	5-HETrE	0.0105806	nmol/mL	Negative	[M-H]-	321.2	115
1023	EICO	5-HETrE	0.00861696	nmol/mL	Negative	[M-H]-	321.2	115
1024	EICO	5-HETrE	0.00428068	nmol/mL	Negative	[M-H]-	321.2	115
1026	EICO	5-HETrE	0.0103729	nmol/mL	Negative	[M-H]-	321.2	115
1027	EICO	5-HETrE	0.00898519	nmol/mL	Negative	[M-H]-	321.2	115
1030	EICO	5-HETrE	0.00413792	nmol/mL	Negative	[M-H]-	321.2	115
1031	EICO	5-HETrE	0.00880798	nmol/mL	Negative	[M-H]-	321.2	115
1032	EICO	5-HETrE	0.00719037	nmol/mL	Negative	[M-H]-	321.2	115
1033	EICO	5-HETrE	0.00922367	nmol/mL	Negative	[M-H]-	321.2	115
1034	EICO	5-HETrE	0.014809	nmol/mL	Negative	[M-H]-	321.2	115
1035	EICO	5-HETrE	0.00635057	nmol/mL	Negative	[M-H]-	321.2	115
1036	EICO	5-HETrE	0.0141472	nmol/mL	Negative	[M-H]-	321.2	115
1037	EICO	5-HETrE	0.00464	nmol/mL	Negative	[M-H]-	321.2	115
1040	EICO	5-HETrE	0.00638509	nmol/mL	Negative	[M-H]-	321.2	115
1042	EICO	5-HETrE	0.0291897	nmol/mL	Negative	[M-H]-	321.2	115
1044	EICO	5-HETrE	0.0120007	nmol/mL	Negative	[M-H]-	321.2	115
1045	EICO	5-HETrE	0.00954902	nmol/mL	Negative	[M-H]-	321.2	115
1046	EICO	5-HETrE	0.00944162	nmol/mL	Negative	[M-H]-	321.2	115
1047	EICO	5-HETrE	0.00836802	nmol/mL	Negative	[M-H]-	321.2	115
1049	EICO	5-HETrE	0.00517695	nmol/mL	Negative	[M-H]-	321.2	115
1051	EICO	5-HETrE	0.00619677	nmol/mL	Negative	[M-H]-	321.2	115
1052	EICO	5-HETrE	0.0058457	nmol/mL	Negative	[M-H]-	321.2	115
1053	EICO	5-HETrE	0.00575168	nmol/mL	Negative	[M-H]-	321.2	115
1056	EICO	5-HETrE	0.0119812	nmol/mL	Negative	[M-H]-	321.2	115
1057	EICO	5-HETrE	0.0122834	nmol/mL	Negative	[M-H]-	321.2	115
1061	EICO	5-HETrE	0.0130452	nmol/mL	Negative	[M-H]-	321.2	115
2001	EICO	5-HETrE	0.0042401	nmol/mL	Negative	[M-H]-	321.2	115
2004	EICO	5-HETrE	0.0075999	nmol/mL	Negative	[M-H]-	321.2	115
2005	EICO	5-HETrE	0.00801513	nmol/mL	Negative	[M-H]-	321.2	115
2008	EICO	5-HETrE	0.00649567	nmol/mL	Negative	[M-H]-	321.2	115
2012	EICO	5-HETrE	0.00827547	nmol/mL	Negative	[M-H]-	321.2	115
2013	EICO	5-HETrE	0.0211996	nmol/mL	Negative	[M-H]-	321.2	115
2014	EICO	5-HETrE	0.00614914	nmol/mL	Negative	[M-H]-	321.2	115
2015	EICO	5-HETrE	0.00576901	nmol/mL	Negative	[M-H]-	321.2	115
2019	EICO	5-HETrE	0.00531984	nmol/mL	Negative	[M-H]-	321.2	115
2020	EICO	5-HETrE	0.0107473	nmol/mL	Negative	[M-H]-	321.2	115
2021	EICO	5-HETrE	0.00751516	nmol/mL	Negative	[M-H]-	321.2	115
2022	EICO	5-HETrE	0.00663786	nmol/mL	Negative	[M-H]-	321.2	115
2023	EICO	5-HETrE	0.00921938	nmol/mL	Negative	[M-H]-	321.2	115
2023	EICO	5-HETrE	0.00921938	nmol/mL	Negative	[M-H]-	321.2	115
2024	EICO	5-HETrE	0.00519588	nmol/mL	Negative	[M-H]-	321.2	115
2025	EICO	5-HETrE	0.00837393	nmol/mL	Negative	[M-H]-	321.2	115
2026	EICO	5-HETrE	0.00693865	nmol/mL	Negative	[M-H]-	321.2	115
2027	EICO	5-HETrE	0.0162195	nmol/mL	Negative	[M-H]-	321.2	115
2028	EICO	5-HETrE	0.0072749	nmol/mL	Negative	[M-H]-	321.2	115
2029	EICO	5-HETrE	0.0052512	nmol/mL	Negative	[M-H]-	321.2	115
2030	EICO	5-HETrE	0.0073779	nmol/mL	Negative	[M-H]-	321.2	115
2031	EICO	5-HETrE	0.00832627	nmol/mL	Negative	[M-H]-	321.2	115
2034	EICO	5-HETrE	0.00993307	nmol/mL	Negative	[M-H]-	321.2	115
2035	EICO	5-HETrE	0.00518443	nmol/mL	Negative	[M-H]-	321.2	115
2036	EICO	5-HETrE	0.00384852	nmol/mL	Negative	[M-H]-	321.2	115
2037	EICO	5-HETrE	0.00763186	nmol/mL	Negative	[M-H]-	321.2	115
2038	EICO	5-HETrE	0.0111151	nmol/mL	Negative	[M-H]-	321.2	115
2041	EICO	5-HETrE	0.0147708	nmol/mL	Negative	[M-H]-	321.2	115
2044	EICO	5-HETrE	0.00456995	nmol/mL	Negative	[M-H]-	321.2	115
2045	EICO	5-HETrE	0.00798275	nmol/mL	Negative	[M-H]-	321.2	115
2047	EICO	5-HETrE	0.00858466	nmol/mL	Negative	[M-H]-	321.2	115
2049	EICO	5-HETrE	0.00302442	nmol/mL	Negative	[M-H]-	321.2	115
2051	EICO	5-HETrE	0.00598265	nmol/mL	Negative	[M-H]-	321.2	115
2052	EICO	5-HETrE	0.012982	nmol/mL	Negative	[M-H]-	321.2	115
2054	EICO	5-HETrE	0.00766154	nmol/mL	Negative	[M-H]-	321.2	115
2055	EICO	5-HETrE	0.0022831	nmol/mL	Negative	[M-H]-	321.2	115
2056	EICO	5-HETrE	0.0050921	nmol/mL	Negative	[M-H]-	321.2	115
2058	EICO	5-HETrE	0.0025921	nmol/mL	Negative	[M-H]-	321.2	115
2060	EICO	5-HETrE	0.0115738	nmol/mL	Negative	[M-H]-	321.2	115
2061	EICO	5-HETrE	0.0109936	nmol/mL	Negative	[M-H]-	321.2	115
2064	EICO	5-HETrE	0.00598053	nmol/mL	Negative	[M-H]-	321.2	115
3001	EICO	5-HETrE	0.00280743	nmol/mL	Negative	[M-H]-	321.2	115
3002	EICO	5-HETrE	0.0145036	nmol/mL	Negative	[M-H]-	321.2	115
3003	EICO	5-HETrE	0.0154228	nmol/mL	Negative	[M-H]-	321.2	115
3004	EICO	5-HETrE	0.00817252	nmol/mL	Negative	[M-H]-	321.2	115
3005	EICO	5-HETrE	0.0151429	nmol/mL	Negative	[M-H]-	321.2	115
3006	EICO	5-HETrE	0.00978916	nmol/mL	Negative	[M-H]-	321.2	115
3007	EICO	5-HETrE	0.00608516	nmol/mL	Negative	[M-H]-	321.2	115
3008	EICO	5-HETrE	0.0120169	nmol/mL	Negative	[M-H]-	321.2	115
3009	EICO	5-HETrE	0.00498907	nmol/mL	Negative	[M-H]-	321.2	115
3012	EICO	5-HETrE	0.00391459	nmol/mL	Negative	[M-H]-	321.2	115
3014	EICO	5-HETrE	0.0056542	nmol/mL	Negative	[M-H]-	321.2	115
3016	EICO	5-HETrE	0.0147133	nmol/mL	Negative	[M-H]-	321.2	115
3018	EICO	5-HETrE	0.00745867	nmol/mL	Negative	[M-H]-	321.2	115
3019	EICO	5-HETrE	0.00689548	nmol/mL	Negative	[M-H]-	321.2	115
3021	EICO	5-HETrE	0.00470857	nmol/mL	Negative	[M-H]-	321.2	115
3022	EICO	5-HETrE	0.013053	nmol/mL	Negative	[M-H]-	321.2	115
3024	EICO	5-HETrE	0.00726664	nmol/mL	Negative	[M-H]-	321.2	115
3025	EICO	5-HETrE	0.0118195	nmol/mL	Negative	[M-H]-	321.2	115
3026	EICO	5-HETrE	0.0150871	nmol/mL	Negative	[M-H]-	321.2	115
3028	EICO	5-HETrE	0.00987945	nmol/mL	Negative	[M-H]-	321.2	115
3029	EICO	5-HETrE	0.0115221	nmol/mL	Negative	[M-H]-	321.2	115
3030	EICO	5-HETrE	0.01121	nmol/mL	Negative	[M-H]-	321.2	115
3031	EICO	5-HETrE	0.00519816	nmol/mL	Negative	[M-H]-	321.2	115
3034	EICO	5-HETrE	0.00547686	nmol/mL	Negative	[M-H]-	321.2	115
3035	EICO	5-HETrE	0.00274821	nmol/mL	Negative	[M-H]-	321.2	115
3037	EICO	5-HETrE	0.00592392	nmol/mL	Negative	[M-H]-	321.2	115
3039	EICO	5-HETrE	0.0160428	nmol/mL	Negative	[M-H]-	321.2	115
3040	EICO	5-HETrE	0.00436125	nmol/mL	Negative	[M-H]-	321.2	115
3042	EICO	5-HETrE	0.00861992	nmol/mL	Negative	[M-H]-	321.2	115
3045	EICO	5-HETrE	0.00463915	nmol/mL	Negative	[M-H]-	321.2	115
3046	EICO	5-HETrE	0.00589447	nmol/mL	Negative	[M-H]-	321.2	115
3047	EICO	5-HETrE	0.0110204	nmol/mL	Negative	[M-H]-	321.2	115
3049	EICO	5-HETrE	0.0138504	nmol/mL	Negative	[M-H]-	321.2	115
3051	EICO	5-HETrE	0.00411231	nmol/mL	Negative	[M-H]-	321.2	115
3055	EICO	5-HETrE	0.00851738	nmol/mL	Negative	[M-H]-	321.2	115
3059	EICO	5-HETrE	0.00529781	nmol/mL	Negative	[M-H]-	321.2	115
3060	EICO	5-HETrE	0.00931497	nmol/mL	Negative	[M-H]-	321.2	115
3061	EICO	5-HETrE	0.00385236	nmol/mL	Negative	[M-H]-	321.2	115
3064	EICO	5-HETrE	0.00707661	nmol/mL	Negative	[M-H]-	321.2	115
3065	EICO	5-HETrE	0.00690923	nmol/mL	Negative	[M-H]-	321.2	115
4002	EICO	5-HETrE	0.00457127	nmol/mL	Negative	[M-H]-	321.2	115
4003	EICO	5-HETrE	0.00965213	nmol/mL	Negative	[M-H]-	321.2	115
4004	EICO	5-HETrE	0.00852136	nmol/mL	Negative	[M-H]-	321.2	115
4005	EICO	5-HETrE	0.0242488	nmol/mL	Negative	[M-H]-	321.2	115
4007	EICO	5-HETrE	0.00427152	nmol/mL	Negative	[M-H]-	321.2	115
4008	EICO	5-HETrE	0.00614337	nmol/mL	Negative	[M-H]-	321.2	115
4009	EICO	5-HETrE	0.006687	nmol/mL	Negative	[M-H]-	321.2	115
4011	EICO	5-HETrE	0.0087944	nmol/mL	Negative	[M-H]-	321.2	115
4012	EICO	5-HETrE	0.00721298	nmol/mL	Negative	[M-H]-	321.2	115
4015	EICO	5-HETrE	0.00430472	nmol/mL	Negative	[M-H]-	321.2	115
4017	EICO	5-HETrE	0.0123146	nmol/mL	Negative	[M-H]-	321.2	115
4019	EICO	5-HETrE	0.0128757	nmol/mL	Negative	[M-H]-	321.2	115
4022	EICO	5-HETrE	0.00432539	nmol/mL	Negative	[M-H]-	321.2	115
4025	EICO	5-HETrE	0.00670486	nmol/mL	Negative	[M-H]-	321.2	115
4026	EICO	5-HETrE	0.0109233	nmol/mL	Negative	[M-H]-	321.2	115
4027	EICO	5-HETrE	0.0062326	nmol/mL	Negative	[M-H]-	321.2	115
4028	EICO	5-HETrE	0.00624897	nmol/mL	Negative	[M-H]-	321.2	115
4030	EICO	5-HETrE	0.0141631	nmol/mL	Negative	[M-H]-	321.2	115
4031	EICO	5-HETrE	0.00620104	nmol/mL	Negative	[M-H]-	321.2	115
4032	EICO	5-HETrE	0.0068428	nmol/mL	Negative	[M-H]-	321.2	115
4034	EICO	5-HETrE	0.0114787	nmol/mL	Negative	[M-H]-	321.2	115
4035	EICO	5-HETrE	0.010464	nmol/mL	Negative	[M-H]-	321.2	115
4037	EICO	5-HETrE	0.00887101	nmol/mL	Negative	[M-H]-	321.2	115
4039	EICO	5-HETrE	0.0118038	nmol/mL	Negative	[M-H]-	321.2	115
4040	EICO	5-HETrE	0.00792099	nmol/mL	Negative	[M-H]-	321.2	115
4041	EICO	5-HETrE	0.0127836	nmol/mL	Negative	[M-H]-	321.2	115
4042	EICO	5-HETrE	0.00840551	nmol/mL	Negative	[M-H]-	321.2	115
4043	EICO	5-HETrE	0.00408096	nmol/mL	Negative	[M-H]-	321.2	115
4045	EICO	5-HETrE	0.00699533	nmol/mL	Negative	[M-H]-	321.2	115
4046	EICO	5-HETrE	0.00508621	nmol/mL	Negative	[M-H]-	321.2	115
4047	EICO	5-HETrE	0.0169919	nmol/mL	Negative	[M-H]-	321.2	115
4048	EICO	5-HETrE	0.00894652	nmol/mL	Negative	[M-H]-	321.2	115
4049	EICO	5-HETrE	0.00477398	nmol/mL	Negative	[M-H]-	321.2	115
4050	EICO	5-HETrE	0.00582019	nmol/mL	Negative	[M-H]-	321.2	115
4052	EICO	5-HETrE	0.0113635	nmol/mL	Negative	[M-H]-	321.2	115
4054	EICO	5-HETrE	0.00306992	nmol/mL	Negative	[M-H]-	321.2	115
4055	EICO	5-HETrE	0.00526053	nmol/mL	Negative	[M-H]-	321.2	115
4056	EICO	5-HETrE	0.00428322	nmol/mL	Negative	[M-H]-	321.2	115
4057	EICO	5-HETrE	0.0102	nmol/mL	Negative	[M-H]-	321.2	115
4061	EICO	5-HETrE	0.00650026	nmol/mL	Negative	[M-H]-	321.2	115
1001	EICO	8-HETE	0.000510059	nmol/mL	Negative	[M-H]-	319.2	155.2
1003	EICO	8-HETE	0.00728815	nmol/mL	Negative	[M-H]-	319.2	155.2
1004	EICO	8-HETE	0.00302545	nmol/mL	Negative	[M-H]-	319.2	155.2
1005	EICO	8-HETE	0.00147111	nmol/mL	Negative	[M-H]-	319.2	155.2
1006	EICO	8-HETE	0.0032865	nmol/mL	Negative	[M-H]-	319.2	155.2
1007	EICO	8-HETE	0.00182934	nmol/mL	Negative	[M-H]-	319.2	155.2
1011	EICO	8-HETE	0.00172815	nmol/mL	Negative	[M-H]-	319.2	155.2
1012	EICO	8-HETE	0.000850799	nmol/mL	Negative	[M-H]-	319.2	155.2
1013	EICO	8-HETE	0.00186891	nmol/mL	Negative	[M-H]-	319.2	155.2
1015	EICO	8-HETE	0.00161366	nmol/mL	Negative	[M-H]-	319.2	155.2
1017	EICO	8-HETE	0.00103934	nmol/mL	Negative	[M-H]-	319.2	155.2
1018	EICO	8-HETE	0.0147825	nmol/mL	Negative	[M-H]-	319.2	155.2
1019	EICO	8-HETE	0.00464005	nmol/mL	Negative	[M-H]-	319.2	155.2
1020	EICO	8-HETE	0.00226977	nmol/mL	Negative	[M-H]-	319.2	155.2
1022	EICO	8-HETE	0.00449057	nmol/mL	Negative	[M-H]-	319.2	155.2
1023	EICO	8-HETE	0.00117118	nmol/mL	Negative	[M-H]-	319.2	155.2
1024	EICO	8-HETE	0.00309532	nmol/mL	Negative	[M-H]-	319.2	155.2
1026	EICO	8-HETE	0.00443308	nmol/mL	Negative	[M-H]-	319.2	155.2
1027	EICO	8-HETE	0.00131875	nmol/mL	Negative	[M-H]-	319.2	155.2
1030	EICO	8-HETE	0.00160405	nmol/mL	Negative	[M-H]-	319.2	155.2
1031	EICO	8-HETE	0.00559227	nmol/mL	Negative	[M-H]-	319.2	155.2
1032	EICO	8-HETE	0.00340643	nmol/mL	Negative	[M-H]-	319.2	155.2
1033	EICO	8-HETE	0.000886313	nmol/mL	Negative	[M-H]-	319.2	155.2
1034	EICO	8-HETE	0.00304272	nmol/mL	Negative	[M-H]-	319.2	155.2
1035	EICO	8-HETE	0.00856434	nmol/mL	Negative	[M-H]-	319.2	155.2
1036	EICO	8-HETE	0.00811882	nmol/mL	Negative	[M-H]-	319.2	155.2
1037	EICO	8-HETE	0.00282877	nmol/mL	Negative	[M-H]-	319.2	155.2
1040	EICO	8-HETE	0.00127419	nmol/mL	Negative	[M-H]-	319.2	155.2
1042	EICO	8-HETE	0.0136283	nmol/mL	Negative	[M-H]-	319.2	155.2
1044	EICO	8-HETE	0.00348473	nmol/mL	Negative	[M-H]-	319.2	155.2
1045	EICO	8-HETE	0.00164249	nmol/mL	Negative	[M-H]-	319.2	155.2
1046	EICO	8-HETE	0.0012315	nmol/mL	Negative	[M-H]-	319.2	155.2
1047	EICO	8-HETE	0.0019329	nmol/mL	Negative	[M-H]-	319.2	155.2
1049	EICO	8-HETE	0.000833178	nmol/mL	Negative	[M-H]-	319.2	155.2
1051	EICO	8-HETE	0.00100684	nmol/mL	Negative	[M-H]-	319.2	155.2
1052	EICO	8-HETE	0.00103892	nmol/mL	Negative	[M-H]-	319.2	155.2
1053	EICO	8-HETE	0.00110605	nmol/mL	Negative	[M-H]-	319.2	155.2
1056	EICO	8-HETE	0.000802464	nmol/mL	Negative	[M-H]-	319.2	155.2
1057	EICO	8-HETE	0.00198002	nmol/mL	Negative	[M-H]-	319.2	155.2
1061	EICO	8-HETE	0.00986768	nmol/mL	Negative	[M-H]-	319.2	155.2
2001	EICO	8-HETE	0.00210607	nmol/mL	Negative	[M-H]-	319.2	155.2
2004	EICO	8-HETE	0.00141434	nmol/mL	Negative	[M-H]-	319.2	155.2
2005	EICO	8-HETE	0.00145265	nmol/mL	Negative	[M-H]-	319.2	155.2
2008	EICO	8-HETE	0.000324757	nmol/mL	Negative	[M-H]-	319.2	155.2
2012	EICO	8-HETE	0.00134676	nmol/mL	Negative	[M-H]-	319.2	155.2
2013	EICO	8-HETE	0.00423302	nmol/mL	Negative	[M-H]-	319.2	155.2
2014	EICO	8-HETE	0.00409969	nmol/mL	Negative	[M-H]-	319.2	155.2
2015	EICO	8-HETE	0.00230937	nmol/mL	Negative	[M-H]-	319.2	155.2
2019	EICO	8-HETE	0.00114879	nmol/mL	Negative	[M-H]-	319.2	155.2
2020	EICO	8-HETE	0.00302795	nmol/mL	Negative	[M-H]-	319.2	155.2
2021	EICO	8-HETE	0.0013261	nmol/mL	Negative	[M-H]-	319.2	155.2
2022	EICO	8-HETE	0.000976404	nmol/mL	Negative	[M-H]-	319.2	155.2
2023	EICO	8-HETE	0.00385896	nmol/mL	Negative	[M-H]-	319.2	155.2
2023	EICO	8-HETE	0.00385896	nmol/mL	Negative	[M-H]-	319.2	155.2
2024	EICO	8-HETE	0.00151564	nmol/mL	Negative	[M-H]-	319.2	155.2
2025	EICO	8-HETE	0.00145828	nmol/mL	Negative	[M-H]-	319.2	155.2
2026	EICO	8-HETE	0.00380656	nmol/mL	Negative	[M-H]-	319.2	155.2
2027	EICO	8-HETE	0.00101108	nmol/mL	Negative	[M-H]-	319.2	155.2
2028	EICO	8-HETE	0.00167793	nmol/mL	Negative	[M-H]-	319.2	155.2
2029	EICO	8-HETE	0.00157472	nmol/mL	Negative	[M-H]-	319.2	155.2
2030	EICO	8-HETE	0.00234114	nmol/mL	Negative	[M-H]-	319.2	155.2
2031	EICO	8-HETE	0.00147248	nmol/mL	Negative	[M-H]-	319.2	155.2
2034	EICO	8-HETE	0.00247747	nmol/mL	Negative	[M-H]-	319.2	155.2
2035	EICO	8-HETE	0.000414452	nmol/mL	Negative	[M-H]-	319.2	155.2
2036	EICO	8-HETE	0.000993424	nmol/mL	Negative	[M-H]-	319.2	155.2
2037	EICO	8-HETE	0.0011102	nmol/mL	Negative	[M-H]-	319.2	155.2
2038	EICO	8-HETE	0.00449707	nmol/mL	Negative	[M-H]-	319.2	155.2
2041	EICO	8-HETE	0.00074411	nmol/mL	Negative	[M-H]-	319.2	155.2
2044	EICO	8-HETE	0.000634169	nmol/mL	Negative	[M-H]-	319.2	155.2
2045	EICO	8-HETE	0.00133928	nmol/mL	Negative	[M-H]-	319.2	155.2
2047	EICO	8-HETE	0.000748213	nmol/mL	Negative	[M-H]-	319.2	155.2
2049	EICO	8-HETE	0.00216547	nmol/mL	Negative	[M-H]-	319.2	155.2
2051	EICO	8-HETE	0.00218144	nmol/mL	Negative	[M-H]-	319.2	155.2
2052	EICO	8-HETE	0.00234514	nmol/mL	Negative	[M-H]-	319.2	155.2
2054	EICO	8-HETE	0.000818604	nmol/mL	Negative	[M-H]-	319.2	155.2
2055	EICO	8-HETE	0.000690974	nmol/mL	Negative	[M-H]-	319.2	155.2
2056	EICO	8-HETE	0.00203654	nmol/mL	Negative	[M-H]-	319.2	155.2
2058	EICO	8-HETE	0.000510925	nmol/mL	Negative	[M-H]-	319.2	155.2
2060	EICO	8-HETE	0.000372253	nmol/mL	Negative	[M-H]-	319.2	155.2
2061	EICO	8-HETE	0.00455218	nmol/mL	Negative	[M-H]-	319.2	155.2
2064	EICO	8-HETE	0.00245862	nmol/mL	Negative	[M-H]-	319.2	155.2
3001	EICO	8-HETE	0.00112972	nmol/mL	Negative	[M-H]-	319.2	155.2
3002	EICO	8-HETE	0.00232268	nmol/mL	Negative	[M-H]-	319.2	155.2
3003	EICO	8-HETE	0.00318486	nmol/mL	Negative	[M-H]-	319.2	155.2
3004	EICO	8-HETE	0.00322488	nmol/mL	Negative	[M-H]-	319.2	155.2
3005	EICO	8-HETE	0.00277235	nmol/mL	Negative	[M-H]-	319.2	155.2
3006	EICO	8-HETE	0.00471302	nmol/mL	Negative	[M-H]-	319.2	155.2
3007	EICO	8-HETE	0.00175012	nmol/mL	Negative	[M-H]-	319.2	155.2
3008	EICO	8-HETE	0.00587449	nmol/mL	Negative	[M-H]-	319.2	155.2
3009	EICO	8-HETE	0.00654036	nmol/mL	Negative	[M-H]-	319.2	155.2
3012	EICO	8-HETE	0.00237066	nmol/mL	Negative	[M-H]-	319.2	155.2
3014	EICO	8-HETE	0.0013483	nmol/mL	Negative	[M-H]-	319.2	155.2
3016	EICO	8-HETE	0.00189112	nmol/mL	Negative	[M-H]-	319.2	155.2
3018	EICO	8-HETE	0.00159357	nmol/mL	Negative	[M-H]-	319.2	155.2
3019	EICO	8-HETE	0.0045748	nmol/mL	Negative	[M-H]-	319.2	155.2
3021	EICO	8-HETE	0.00238666	nmol/mL	Negative	[M-H]-	319.2	155.2
3022	EICO	8-HETE	0.00220773	nmol/mL	Negative	[M-H]-	319.2	155.2
3024	EICO	8-HETE	0.00375212	nmol/mL	Negative	[M-H]-	319.2	155.2
3025	EICO	8-HETE	0.000887218	nmol/mL	Negative	[M-H]-	319.2	155.2
3026	EICO	8-HETE	0.00504331	nmol/mL	Negative	[M-H]-	319.2	155.2
3028	EICO	8-HETE	0.00239832	nmol/mL	Negative	[M-H]-	319.2	155.2
3029	EICO	8-HETE	0.000670681	nmol/mL	Negative	[M-H]-	319.2	155.2
3030	EICO	8-HETE	0.00478675	nmol/mL	Negative	[M-H]-	319.2	155.2
3031	EICO	8-HETE	0.00123719	nmol/mL	Negative	[M-H]-	319.2	155.2
3034	EICO	8-HETE	0.000494654	nmol/mL	Negative	[M-H]-	319.2	155.2
3035	EICO	8-HETE	0.00430914	nmol/mL	Negative	[M-H]-	319.2	155.2
3037	EICO	8-HETE	0.00185461	nmol/mL	Negative	[M-H]-	319.2	155.2
3039	EICO	8-HETE	0.00370707	nmol/mL	Negative	[M-H]-	319.2	155.2
3040	EICO	8-HETE	0.000786489	nmol/mL	Negative	[M-H]-	319.2	155.2
3042	EICO	8-HETE	0.00128286	nmol/mL	Negative	[M-H]-	319.2	155.2
3045	EICO	8-HETE	0.000326392	nmol/mL	Negative	[M-H]-	319.2	155.2
3046	EICO	8-HETE	0.000443675	nmol/mL	Negative	[M-H]-	319.2	155.2
3047	EICO	8-HETE	0.000917183	nmol/mL	Negative	[M-H]-	319.2	155.2
3049	EICO	8-HETE	0.00312724	nmol/mL	Negative	[M-H]-	319.2	155.2
3051	EICO	8-HETE	0.00140764	nmol/mL	Negative	[M-H]-	319.2	155.2
3055	EICO	8-HETE	0.00440509	nmol/mL	Negative	[M-H]-	319.2	155.2
3059	EICO	8-HETE	0.000376644	nmol/mL	Negative	[M-H]-	319.2	155.2
3060	EICO	8-HETE	0.00202161	nmol/mL	Negative	[M-H]-	319.2	155.2
3061	EICO	8-HETE	0.00371182	nmol/mL	Negative	[M-H]-	319.2	155.2
3064	EICO	8-HETE	0.00425489	nmol/mL	Negative	[M-H]-	319.2	155.2
3065	EICO	8-HETE	0.00210722	nmol/mL	Negative	[M-H]-	319.2	155.2
4002	EICO	8-HETE	0.000474174	nmol/mL	Negative	[M-H]-	319.2	155.2
4003	EICO	8-HETE	0.000580789	nmol/mL	Negative	[M-H]-	319.2	155.2
4004	EICO	8-HETE	0.00179976	nmol/mL	Negative	[M-H]-	319.2	155.2
4005	EICO	8-HETE	0.0165035	nmol/mL	Negative	[M-H]-	319.2	155.2
4007	EICO	8-HETE	0.000612349	nmol/mL	Negative	[M-H]-	319.2	155.2
4008	EICO	8-HETE	0.000296564	nmol/mL	Negative	[M-H]-	319.2	155.2
4009	EICO	8-HETE	0.00340117	nmol/mL	Negative	[M-H]-	319.2	155.2
4011	EICO	8-HETE	0.000934715	nmol/mL	Negative	[M-H]-	319.2	155.2
4012	EICO	8-HETE	0.00136659	nmol/mL	Negative	[M-H]-	319.2	155.2
4015	EICO	8-HETE	0.000914403	nmol/mL	Negative	[M-H]-	319.2	155.2
4017	EICO	8-HETE	0.000949765	nmol/mL	Negative	[M-H]-	319.2	155.2
4019	EICO	8-HETE	0.00134593	nmol/mL	Negative	[M-H]-	319.2	155.2
4022	EICO	8-HETE	0.000647483	nmol/mL	Negative	[M-H]-	319.2	155.2
4025	EICO	8-HETE	0.000334388	nmol/mL	Negative	[M-H]-	319.2	155.2
4026	EICO	8-HETE	0.000338395	nmol/mL	Negative	[M-H]-	319.2	155.2
4027	EICO	8-HETE	0.00229381	nmol/mL	Negative	[M-H]-	319.2	155.2
4028	EICO	8-HETE	0.00229375	nmol/mL	Negative	[M-H]-	319.2	155.2
4030	EICO	8-HETE	0.000474127	nmol/mL	Negative	[M-H]-	319.2	155.2
4031	EICO	8-HETE	0.00171329	nmol/mL	Negative	[M-H]-	319.2	155.2
4032	EICO	8-HETE	0.000778887	nmol/mL	Negative	[M-H]-	319.2	155.2
4034	EICO	8-HETE	0.00163692	nmol/mL	Negative	[M-H]-	319.2	155.2
4035	EICO	8-HETE	0.00184773	nmol/mL	Negative	[M-H]-	319.2	155.2
4037	EICO	8-HETE	0.000772507	nmol/mL	Negative	[M-H]-	319.2	155.2
4039	EICO	8-HETE	0.00133083	nmol/mL	Negative	[M-H]-	319.2	155.2
4040	EICO	8-HETE	0.00495396	nmol/mL	Negative	[M-H]-	319.2	155.2
4041	EICO	8-HETE	0.00229574	nmol/mL	Negative	[M-H]-	319.2	155.2
4042	EICO	8-HETE	0.00279686	nmol/mL	Negative	[M-H]-	319.2	155.2
4043	EICO	8-HETE	0.000226477	nmol/mL	Negative	[M-H]-	319.2	155.2
4045	EICO	8-HETE	0.00398233	nmol/mL	Negative	[M-H]-	319.2	155.2
4046	EICO	8-HETE	0.000190307	nmol/mL	Negative	[M-H]-	319.2	155.2
4047	EICO	8-HETE	0.00224663	nmol/mL	Negative	[M-H]-	319.2	155.2
4048	EICO	8-HETE	0.00302009	nmol/mL	Negative	[M-H]-	319.2	155.2
4049	EICO	8-HETE	0.00445841	nmol/mL	Negative	[M-H]-	319.2	155.2
4050	EICO	8-HETE	0.000969395	nmol/mL	Negative	[M-H]-	319.2	155.2
4052	EICO	8-HETE	0.00264757	nmol/mL	Negative	[M-H]-	319.2	155.2
4054	EICO	8-HETE	0.00115696	nmol/mL	Negative	[M-H]-	319.2	155.2
4055	EICO	8-HETE	0.0047016	nmol/mL	Negative	[M-H]-	319.2	155.2
4056	EICO	8-HETE	0.00382146	nmol/mL	Negative	[M-H]-	319.2	155.2
4057	EICO	8-HETE	0.00557156	nmol/mL	Negative	[M-H]-	319.2	155.2
4061	EICO	8-HETE	0.00128815	nmol/mL	Negative	[M-H]-	319.2	155.2
1001	EICO	9-HODE	0.0272565	nmol/mL	Negative	[M-H]-	295.2	171.5
1003	EICO	9-HODE	0.0110235	nmol/mL	Negative	[M-H]-	295.2	171.5
1004	EICO	9-HODE	0.00416032	nmol/mL	Negative	[M-H]-	295.2	171.5
1005	EICO	9-HODE	0.0121736	nmol/mL	Negative	[M-H]-	295.2	171.5
1006	EICO	9-HODE	0.0182347	nmol/mL	Negative	[M-H]-	295.2	171.5
1007	EICO	9-HODE	0.0049755	nmol/mL	Negative	[M-H]-	295.2	171.5
1011	EICO	9-HODE	0.0156263	nmol/mL	Negative	[M-H]-	295.2	171.5
1012	EICO	9-HODE	0.00396259	nmol/mL	Negative	[M-H]-	295.2	171.5
1013	EICO	9-HODE	0.0111246	nmol/mL	Negative	[M-H]-	295.2	171.5
1015	EICO	9-HODE	0.00371566	nmol/mL	Negative	[M-H]-	295.2	171.5
1017	EICO	9-HODE	0.0365298	nmol/mL	Negative	[M-H]-	295.2	171.5
1018	EICO	9-HODE	0.0251383	nmol/mL	Negative	[M-H]-	295.2	171.5
1019	EICO	9-HODE	0.0133606	nmol/mL	Negative	[M-H]-	295.2	171.5
1020	EICO	9-HODE	0.0168748	nmol/mL	Negative	[M-H]-	295.2	171.5
1022	EICO	9-HODE	0.0110166	nmol/mL	Negative	[M-H]-	295.2	171.5
1023	EICO	9-HODE	0.0038378	nmol/mL	Negative	[M-H]-	295.2	171.5
1024	EICO	9-HODE	0.00683312	nmol/mL	Negative	[M-H]-	295.2	171.5
1026	EICO	9-HODE	0.00940798	nmol/mL	Negative	[M-H]-	295.2	171.5
1027	EICO	9-HODE	0.0127548	nmol/mL	Negative	[M-H]-	295.2	171.5
1030	EICO	9-HODE	0.00408308	nmol/mL	Negative	[M-H]-	295.2	171.5
1031	EICO	9-HODE	0.0147479	nmol/mL	Negative	[M-H]-	295.2	171.5
1032	EICO	9-HODE	0.0113604	nmol/mL	Negative	[M-H]-	295.2	171.5
1033	EICO	9-HODE	0.00651953	nmol/mL	Negative	[M-H]-	295.2	171.5
1034	EICO	9-HODE	0.018109	nmol/mL	Negative	[M-H]-	295.2	171.5
1035	EICO	9-HODE	0.0131356	nmol/mL	Negative	[M-H]-	295.2	171.5
1036	EICO	9-HODE	0.0251385	nmol/mL	Negative	[M-H]-	295.2	171.5
1037	EICO	9-HODE	0.00688636	nmol/mL	Negative	[M-H]-	295.2	171.5
1040	EICO	9-HODE	0.00799302	nmol/mL	Negative	[M-H]-	295.2	171.5
1042	EICO	9-HODE	0.0112391	nmol/mL	Negative	[M-H]-	295.2	171.5
1044	EICO	9-HODE	0.0102417	nmol/mL	Negative	[M-H]-	295.2	171.5
1045	EICO	9-HODE	0.0106611	nmol/mL	Negative	[M-H]-	295.2	171.5
1046	EICO	9-HODE	0.0150288	nmol/mL	Negative	[M-H]-	295.2	171.5
1047	EICO	9-HODE	0.00550696	nmol/mL	Negative	[M-H]-	295.2	171.5
1049	EICO	9-HODE	0.0205643	nmol/mL	Negative	[M-H]-	295.2	171.5
1051	EICO	9-HODE	0.0132765	nmol/mL	Negative	[M-H]-	295.2	171.5
1052	EICO	9-HODE	0.00551652	nmol/mL	Negative	[M-H]-	295.2	171.5
1053	EICO	9-HODE	0.0142283	nmol/mL	Negative	[M-H]-	295.2	171.5
1056	EICO	9-HODE	0.00558418	nmol/mL	Negative	[M-H]-	295.2	171.5
1057	EICO	9-HODE	0.0181439	nmol/mL	Negative	[M-H]-	295.2	171.5
1061	EICO	9-HODE	0.00888229	nmol/mL	Negative	[M-H]-	295.2	171.5
2001	EICO	9-HODE	0.0222594	nmol/mL	Negative	[M-H]-	295.2	171.5
2004	EICO	9-HODE	0.017967	nmol/mL	Negative	[M-H]-	295.2	171.5
2005	EICO	9-HODE	0.014032	nmol/mL	Negative	[M-H]-	295.2	171.5
2008	EICO	9-HODE	0.017562	nmol/mL	Negative	[M-H]-	295.2	171.5
2012	EICO	9-HODE	0.0042692	nmol/mL	Negative	[M-H]-	295.2	171.5
2013	EICO	9-HODE	0.0758697	nmol/mL	Negative	[M-H]-	295.2	171.5
2014	EICO	9-HODE	0.0254937	nmol/mL	Negative	[M-H]-	295.2	171.5
2015	EICO	9-HODE	0.00925283	nmol/mL	Negative	[M-H]-	295.2	171.5
2019	EICO	9-HODE	0.00492711	nmol/mL	Negative	[M-H]-	295.2	171.5
2020	EICO	9-HODE	0.0159182	nmol/mL	Negative	[M-H]-	295.2	171.5
2021	EICO	9-HODE	0.00556831	nmol/mL	Negative	[M-H]-	295.2	171.5
2022	EICO	9-HODE	0.0686591	nmol/mL	Negative	[M-H]-	295.2	171.5
2023	EICO	9-HODE	0.00853911	nmol/mL	Negative	[M-H]-	295.2	171.5
2023	EICO	9-HODE	0.00853911	nmol/mL	Negative	[M-H]-	295.2	171.5
2024	EICO	9-HODE	0.00674683	nmol/mL	Negative	[M-H]-	295.2	171.5
2025	EICO	9-HODE	0.015282	nmol/mL	Negative	[M-H]-	295.2	171.5
2026	EICO	9-HODE	0.016559	nmol/mL	Negative	[M-H]-	295.2	171.5
2027	EICO	9-HODE	0.0147642	nmol/mL	Negative	[M-H]-	295.2	171.5
2028	EICO	9-HODE	0.0145586	nmol/mL	Negative	[M-H]-	295.2	171.5
2029	EICO	9-HODE	0.00816939	nmol/mL	Negative	[M-H]-	295.2	171.5
2030	EICO	9-HODE	0.0221739	nmol/mL	Negative	[M-H]-	295.2	171.5
2031	EICO	9-HODE	0.00701176	nmol/mL	Negative	[M-H]-	295.2	171.5
2034	EICO	9-HODE	0.00782768	nmol/mL	Negative	[M-H]-	295.2	171.5
2035	EICO	9-HODE	0.00626925	nmol/mL	Negative	[M-H]-	295.2	171.5
[truncated: 30,331 more rows]
