# Supplementary material for: Alterations in Serum Polyunsaturated Fatty Acids and Eicosanoids in Patients with Mild to Moderate Chronic Obstructive Pulmonary Disease (COPD)
Source: Int J Mol Sci. 2016 Sep 20;17(9):1583. doi: 10.3390/ijms17091583 (PMC5037848; doi:10.3390/ijms17091583)
Supplement: Supplementary file 1 [file ijms-17-01583-s001.zip › ijms-143212-Supplementary Materials/ijms-143212-Table S2.xlsx]

## Sheet: SI_TABLE_2
Titz et al. (2016)
Supplementary Table: Lipid to lipid-module assignments
lipid	lipid module	color
13-HODE	0	grey
9-HODE	0	grey
CE 21:1	0	grey
LPE 20:4	0	grey
PE P-16:0/18:1 (PE O-16:1/18:1)	0	grey
CE 14:0	1	turquoise
CE 15:0	1	turquoise
CE 16:0	1	turquoise
CE 17:0	1	turquoise
CE 17:1	1	turquoise
CE 18:0	1	turquoise
CE 18:1	1	turquoise
CE 18:2	1	turquoise
CE 19:0	1	turquoise
CE 19:1	1	turquoise
CE 19:2	1	turquoise
CE 22:5	1	turquoise
Cer(d18:1/16:0)	1	turquoise
Cer(d18:1/18:1)	1	turquoise
SM (d18:0/16:0) (d18:1/15:0-OH)	1	turquoise
SM (d18:0/23:0) (d18:1/22:0-OH)	1	turquoise
SM (d18:1/14:0) (d18:1/13:1-OH)	1	turquoise
SM (d18:1/14:1) (d18:1/13:2-OH)	1	turquoise
SM (d18:1/15:0) (d18:1/14:1-OH)	1	turquoise
SM (d18:1/16:0) (d18:1/15:1-OH)	1	turquoise
SM (d18:1/16:1) (d18:1/15:2-OH)	1	turquoise
SM (d18:1/17:0) (d18:1/16:1-OH)	1	turquoise
SM (d18:1/18:0)	1	turquoise
SM (d18:1/18:1)	1	turquoise
SM (d18:1/18:2)	1	turquoise
SM (d18:1/19:0) (d18:1/18:1-OH)	1	turquoise
SM (d18:1/21:0) (d18:1/20:1-OH)	1	turquoise
SM (d18:1/23:0) (d18:1/22:1-OH)	1	turquoise
SM (d18:1/23:1) (d18:1/22:2-OH)	1	turquoise
SM (d18:1/24:0) (d18:1/23:1-OH)	1	turquoise
SM (d18:1/24:1) (d18:1/23:2-OH)	1	turquoise
SM (d18:1/24:2)	1	turquoise
Gb3(d18:1/16:0)	2	blue
Gb3(d18:1/18:0)	2	blue
Gb3(d18:1/20:0)	2	blue
Gb3(d18:1/22:0)	2	blue
Gb3(d18:1/22:1)	2	blue
Gb3(d18:1/23:0)	2	blue
Gb3(d18:1/24:0)	2	blue
Gb3(d18:1/24:1)	2	blue
Gb3(d18:1/26:0)	2	blue
Gb3(d18:1/26:1)	2	blue
Glc/GalCer(d18:1/16:0)	2	blue
Glc/GalCer(d18:1/18:0)	2	blue
Glc/GalCer(d18:1/20:0)	2	blue
Glc/GalCer(d18:1/22:0)	2	blue
Glc/GalCer(d18:1/22:1)	2	blue
Glc/GalCer(d18:1/23:0)	2	blue
Glc/GalCer(d18:1/24:0)	2	blue
Glc/GalCer(d18:1/24:1)	2	blue
Glc/GalCer(d18:1/26:0)	2	blue
Glc/GalCer(d18:1/26:1)	2	blue
LacCer(d18:1/16:0)	2	blue
LacCer(d18:1/18:0)	2	blue
LacCer(d18:1/20:0)	2	blue
LacCer(d18:1/22:0)	2	blue
LacCer(d18:1/23:0)	2	blue
LacCer(d18:1/24:0)	2	blue
LacCer(d18:1/24:1)	2	blue
LacCer(d18:1/26:0)	2	blue
LacCer(d18:1/26:1)	2	blue
DAG 16:0/18:1	3	brown
DAG 16:0/18:2	3	brown
DAG 18:1/18:1	3	brown
PE 16:0/20:4	3	brown
PE 18:0/20:4	3	brown
PI 18:0/20:4	3	brown
TAG 48:0 total (16:0/16:0/16:0)	3	brown
TAG 48:1 total (14:0/16:0/18:1)(16:0/16:0/16:1)	3	brown
TAG 48:2 total (12:0/18:1/18:1)(14:0/16:0/18:2)(14:0/16:1/18:1)(16:0/16:1/16:1)	3	brown
TAG 49:1 total (15:0/16:0/18:1)	3	brown
TAG 50:1 total (16:0/16:0/18:1)	3	brown
TAG 50:2 total (14:0/18:1/18:1)(16:0/16:0/18:2)(16:0/16:1/18:1)	3	brown
TAG 50:3 total (14:0/18:1/18:2)(16:0/16:0/18:3)(16:0/16:1/18:2)(16:1/16:1/18:1)	3	brown
TAG 50:4 total (14:0/18:2/18:2)(16:1/16:1/18:2)	3	brown
TAG 51:1 total (16:0/17:0/18:1)	3	brown
TAG 51:2 total (15:0/18:1/18:1)	3	brown
TAG 52:1 total (16:0/18:0/18:1)	3	brown
TAG 52:2 total (16:0/18:0/18:2)(16:0/18:1/18:1)	3	brown
TAG 52:3 total (16:0/18:1/18:2)(16:1/18:1/18:1)	3	brown
TAG 52:4 total (16:0/18:1/18:3)(16:0/18:2/18:2)(16:1/18:1/18:2)	3	brown
TAG 52:5 total (16:0/18:2/18:3)(16:1/18:1/18:3)(16:1/18:2/18:2)	3	brown
TAG 53:2 total (17:0/18:1/18:1)	3	brown
TAG 53:3 total (17:0/18:1/18:2)	3	brown
TAG 54:2 total (16:0/18:1/20:1)(18:0/18:1/18:1)	3	brown
TAG 54:3 total (16:0/18:1/20:2)(18:0/18:1/18:2)(18:1/18:1/18:1)	3	brown
TAG 54:4 total (16:0/18:1/20:3)(18:0/18:2/18:2)(18:1/18:1/18:2)	3	brown
TAG 54:5 total (16:0/18:1/20:4)(16:0/18:2/20:3)(18:1/18:1/18:3)(18:1/18:2/18:2)	3	brown
TAG 54:6 total (16:0/18:1/20:5)(16:0/18:2/20:4)(18:1/18:2/18:3)(18:2/18:2/18:2)	3	brown
TAG 56:6 total (16:0/18:1/22:5)(18:1/18:1/20:4)	3	brown
PC 16:0/18:2	4	yellow
PC 16:1/18:2	4	yellow
PC 17:0/18:2	4	yellow
PC 18:0/18:2	4	yellow
PC 18:1/18:2	4	yellow
PC 18:2/18:2	4	yellow
PC 18:2/20:4	4	yellow
PC P-16:0/18:2 (PC O-16:1/18:2)	4	yellow
PC P-18:0/18:2 (PC O-18:1/18:2)	4	yellow
PE P-16:0/18:2 (PE O-16:1/18:2)	4	yellow
PE P-18:0/18:1 (PE O-18:1/18:1)	4	yellow
PE P-18:0/18:2 (PE O-18:1/18:2)	4	yellow
PE P-18:1/18:1	4	yellow
PE P-18:1/18:2	4	yellow
CE 16:1	5	green
PC 14:0/18:1	5	green
PC 14:0/18:2	5	green
PC 16:0/16:0	5	green
PC 16:0/16:1	5	green
PC 16:0/17:1	5	green
PC 16:0/18:1	5	green
PC 16:0/18:3	5	green
PC 16:0/22:5	5	green
PC 16:1/18:1	5	green
PC 18:0/18:1	5	green
PC 18:1/18:1	5	green
PC P-18:0/16:0 (PC O-18:1/16:0)	5	green
5-HEPE	6	red
CE 20:5	6	red
CE 22:6	6	red
DHA	6	red
EPA	6	red
LPC 22:6	6	red
LPE 22:6	6	red
PC 16:0/20:5	6	red
PC 16:0/22:6	6	red
PC 18:0/20:5	6	red
PC 18:0/22:6	6	red
LPC 16:0	7	black
LPC 16:1	7	black
LPC 18:0	7	black
LPC 18:1	7	black
LPC 18:2	7	black
LPC 20:3	7	black
LPC 20:4	7	black
LPE 16:0	7	black
LPE 18:0	7	black
LPE 18:1	7	black
PE 18:1/18:1	7	black
Cer(d18:1/18:0)	8	pink
Cer(d18:1/20:0)	8	pink
Cer(d18:1/22:0)	8	pink
Cer(d18:1/22:1)	8	pink
Cer(d18:1/23:0)	8	pink
Cer(d18:1/24:0)	8	pink
Cer(d18:1/24:1)	8	pink
Cer(d18:1/26:0)	8	pink
Cer(d18:1/26:1)	8	pink
CE 20:4	9	magenta
PC 16:0/20:4	9	magenta
PC 18:0/20:4	9	magenta
PC 18:1/20:4	9	magenta
PC P-18:0/20:4 (PC O-18:1/20:4)	9	magenta
PC P-18:1/20:4	9	magenta
PE P-16:0/20:4 (PE O-16:1/20:4)	9	magenta
PE P-18:0/20:4 (PE O-18:1/20:4)	9	magenta
PE P-18:1/20:4	9	magenta
CE 14:1	10	purple
CE 18:3	10	purple
CE 20:3	10	purple
PC 16:0/20:3	10	purple
PC 16:0/22:4	10	purple
PC 18:0/20:3	10	purple
PC 18:1/20:3	10	purple
PC P-18:0/20:3 (PC O-18:1/20:3)	10	purple
11-HETE	11	greenyellow
12-HEPE	11	greenyellow
12-HETE	11	greenyellow
15-HETE	11	greenyellow
8-HETE	11	greenyellow
TXB2	11	greenyellow
Cer(d18:0/16:0)	12	tan
Cer(d18:0/18:0)	12	tan
Cer(d18:0/20:0)	12	tan
Cer(d18:0/22:0)	12	tan
Cer(d18:0/24:0)	12	tan
Cer(d18:0/24:1)	12	tan
11_12-DHET	13	salmon
14_15-DHET	13	salmon
15-HETrE	13	salmon
5_6-DHET	13	salmon
5-HETrE	13	salmon
AA	13	salmon
