# Supplementary material for: Alterations in Serum Polyunsaturated Fatty Acids and Eicosanoids in Patients with Mild to Moderate Chronic Obstructive Pulmonary Disease (COPD)
Source: Int J Mol Sci. 2016 Sep 20;17(9):1583. doi: 10.3390/ijms17091583 (PMC5037848; doi:10.3390/ijms17091583)
Supplement: Supplementary file 1 [file ijms-17-01583-s001.zip › ijms-143212-Supplementary Materials/ijms-143212-Table S3.xlsx]

## Sheet: Sheet1
Titz et al. (2016) Alterations in serum polyunsaturated fatty acids and eicosanoids in patients with mild to moderate COPD .
SI TABLE 3: Group comparisons for plasma protein markers (whole study population)
		COPD (N = 59)		CS (N = 60)		FS (N = 60)		NS (N = 60)		Unadjusted p-values						Adjusted p-values (FDR)
Analyte	Unit	Mean	SEM	Mean	SEM	Mean	SEM	Mean	SEM	COPD vs CS	COPD vs FS	COPD vs NS	CS vs FS	CS vs NS	FS vs NS	COPD vs CS	COPD vs FS	COPD vs NS	CS vs FS	CS vs NS	FS vs NS
Alpha-2-Macroglobulin (A2Macro)	mg/mL	1.45763	0.0302148	1.45167	0.0305775	1.355	0.0240556	1.419	0.0253447	0.841948	0.00932376	0.260585	0.0250712	0.384336	0.0751935	0.91211	0.022038	0.376401	0.0592593	0.565569	0.325839
Alpha-1-Antitrypsin (AAT)	mg/mL	2.25593	0.0694502	2.355	0.0676659	1.77917	0.0520627	1.818	0.0568946	0.326241	5.72435e-07	5.83063e-07	2.47575e-09	6.26434e-07	0.645295	0.732468	7.44166e-06	5.05322e-06	6.43694e-08	8.14364e-06	0.798936
Beta-2-Microglobulin (B2M)	ug/mL	1.68881	0.0654834	1.56817	0.0463873	1.37067	0.0335725	1.53883	0.060512	0.145902	1.0687e-05	0.0695117	0.000136185	0.680034	0.0126388	0.732468	4.63104e-05	0.150609	0.000590135	0.807753	0.109536
Brain-Derived Neurotrophic Factor (BDNF)	ng/mL	2.0761	0.124788	1.86267	0.183987	1.64433	0.122196	1.67883	0.0878671	0.386267	0.010911	0.0113077	0.311213	0.39177	0.823691	0.732468	0.0236406	0.0419998	0.371026	0.565569	0.844564
Complement C3 (C3)	mg/mL	1.30661	0.104735	1.22833	0.0357124	1.11017	0.0244735	1.047	0.0298426	0.495841	0.0753059	0.0158018	0.00751597	0.000369609	0.110916	0.732468	0.115174	0.0513559	0.0279165	0.00240246	0.389954
C-Reactive Protein (CRP)	ug/mL	5.55831	0.90759	4.82967	0.656322	2.85183	1.02893	2.541	0.721618	0.463147	0.0361799	0.00848014	0.0660034	0.0318752	0.810955	0.732468	0.0627118	0.0367473	0.132007	0.0957125	0.844564
Eotaxin-1	pg/mL	615.517	32.9571	547.15	37.1989	442.642	21.7562	453.558	25.837	0.138577	3.23545e-06	0.000122744	0.0227689	0.0205615	0.728012	0.732468	2.19325e-05	0.000797837	0.0592593	0.0763713	0.844564
Ferritin (FRTN)	ng/mL	126.176	15.2512	149.332	16.4805	175.787	30.6428	150.8	19.747	0.330085	0.152221	0.315631	0.457208	0.951458	0.523209	0.732468	0.208302	0.410321	0.475496	0.975787	0.752545
Factor VII	ng/mL	478.949	19.4189	483.033	14.3128	456.317	14.6506	421.833	12.707	0.838451	0.327586	0.0280991	0.133289	0.00300649	0.054577	0.91211	0.387148	0.0676366	0.203853	0.0156337	0.283801
Fibrinogen	mg/mL	4.88305	0.227071	4.91333	0.213624	4.45	0.210696	4.38	0.290828	0.905027	0.127375	0.229059	0.131009	0.160838	0.844564	0.941228	0.183986	0.350325	0.203853	0.298699	0.844564
Haptoglobin	mg/mL	2.92	0.293041	2.12633	0.149854	1.31482	0.101049	1.2205	0.0982	0.0192213	4.8947e-06	4.22629e-07	3.86148e-05	2.75811e-06	0.516916	0.499754	2.54525e-05	5.05322e-06	0.000250996	2.39036e-05	0.752545
Intercellular Adhesion Molecule 1 (ICAM-1)	ng/mL	162.864	7.10345	161.683	7.40421	108.483	3.47513	112.567	4.2354	0.976788	2.5281e-10	4.51809e-08	1.11821e-08	1.49741e-07	0.479129	0.976788	6.57305e-09	1.1747e-06	1.45367e-07	3.89327e-06	0.752545
Interleukin-18 (IL-18)	pg/mL	269.339	15.5356	247.633	15.73	203.317	13.3594	243.567	25.8345	0.206899	0.00147835	0.333004	0.0231146	0.888866	0.180491	0.732468	0.00480463	0.412291	0.0592593	0.975787	0.508402
Interleukin-8 (IL-8)	pg/mL	7.25085	0.850198	6.84833	0.974405	4.985	0.354549	5.09833	0.322766	0.816286	0.012332	0.0180281	0.0728907	0.109544	0.801725	0.91211	0.0242792	0.0520811	0.135369	0.237346	0.844564
Interferon gamma Induced Protein 10 (IP-10)	pg/mL	481.051	72.5814	426	35.3658	517.6	92.6941	732.633	138.114	0.565016	0.792734	0.100677	0.350499	0.0395675	0.205095	0.77318	0.792734	0.186972	0.396216	0.102875	0.508402
Monocyte Chemotactic Protein 1 (MCP-1)	pg/mL	287.763	12.3019	293.667	12.1102	250.433	11.2922	293.117	13.0022	0.662848	0.0130734	0.686559	0.0125347	0.975787	0.00784861	0.861702	0.0242792	0.743773	0.0407378	0.975787	0.109536
Macrophage Inflammatory Protein-1 beta (MIP-1 beta)	pg/mL	131.881	7.94362	133.358	10.9629	137.592	6.07173	145.533	9.0386	0.828274	0.448318	0.280726	0.73331	0.4133	0.477117	0.91211	0.506794	0.384152	0.73331	0.565569	0.752545
Matrix Metalloproteinase-3 (MMP-3)	ng/mL	13.1017	0.907816	11.515	0.612353	12.1317	0.714888	12.6367	0.802397	0.0941266	0.29562	0.736032	0.456451	0.186369	0.549937	0.732468	0.366006	0.765474	0.475496	0.32304	0.752545
T-Cell-Specific Protein RANTES (RANTES)	ng/mL	5.33051	0.378678	4.87167	0.325343	4.01333	0.314979	4.47833	0.255605	0.44969	0.00351443	0.0985419	0.0597889	0.305049	0.252811	0.732468	0.0101528	0.186972	0.129543	0.495705	0.508402
Stem Cell Factor (SCF)	pg/mL	448	13.5222	425.083	13.3765	395.75	13.3935	418.383	11.6199	0.205546	0.0062557	0.126333	0.0935474	0.683484	0.220487	0.732468	0.0162648	0.218977	0.162149	0.807753	0.508402
Tissue Inhibitor of Metalloproteinases 1 (TIMP-1)	ng/mL	80.4407	2.99359	75.1833	2.26799	65.55	1.10684	68.5833	1.61565	0.13735	3.37423e-06	0.00125632	0.000121045	0.0187217	0.119986	0.732468	2.19325e-05	0.00653288	0.000590135	0.0763713	0.389954
Tumor necrosis factor receptor 2 (TNFR2)	ng/mL	7.80339	0.328368	7.55	0.289403	6.00833	0.228595	6.76833	0.325338	0.507093	1.41611e-05	0.0286155	1.46791e-05	0.0881509	0.0430021	0.732468	5.25985e-05	0.0676366	0.000127219	0.208357	0.279514
Vascular Cell Adhesion Molecule-1 (VCAM-1)	ng/mL	522.593	17.3283	504.167	14.1538	484.667	12.4501	536.65	16.7877	0.292467	0.0707482	0.635363	0.289867	0.150012	0.0103308	0.732468	0.114966	0.718236	0.371026	0.298699	0.109536
Vitamin D-Binding Protein (VDBP)	ug/mL	397.237	71.7033	341.4	15.5839	312.983	14.6533	291.767	14.9484	0.433605	0.243726	0.147983	0.22566	0.0331313	0.254201	0.732468	0.316844	0.240472	0.308797	0.0957125	0.508402
Vascular Endothelial Growth Factor (VEGF)	pg/mL	74.1695	3.64348	79.6917	4.32407	72.7583	3.08114	75.075	3.87059	0.257424	0.762041	0.84762	0.166418	0.440108	0.628971	0.732468	0.792523	0.84762	0.240382	0.572141	0.798936
von Willebrand Factor (vWF)	ug/mL	81.8644	6.4104	102.05	25.1931	75.2	6.79214	104.508	28.1649	0.445731	0.527677	0.399647	0.313945	0.949684	0.318725	0.732468	0.57165	0.47231	0.371026	0.975787	0.591919
SEM = standard error of the mean; p-values based on a paired t-test with samples matched by ethnicity, gender, and age; p-value adjustment according to Benjamini-Hochberg (FDR); values with an unadjusted and adjusted p-value < 0.05 are marked in red.
