# Supplementary figures and images for: Alterations in Serum Polyunsaturated Fatty Acids and Eicosanoids in Patients with Mild to Moderate Chronic Obstructive Pulmonary Disease (COPD)
Source: MDPI journal article supplement (doi:10.3390/ijms17091583), 2016-09-20

Cluster Dendrogram

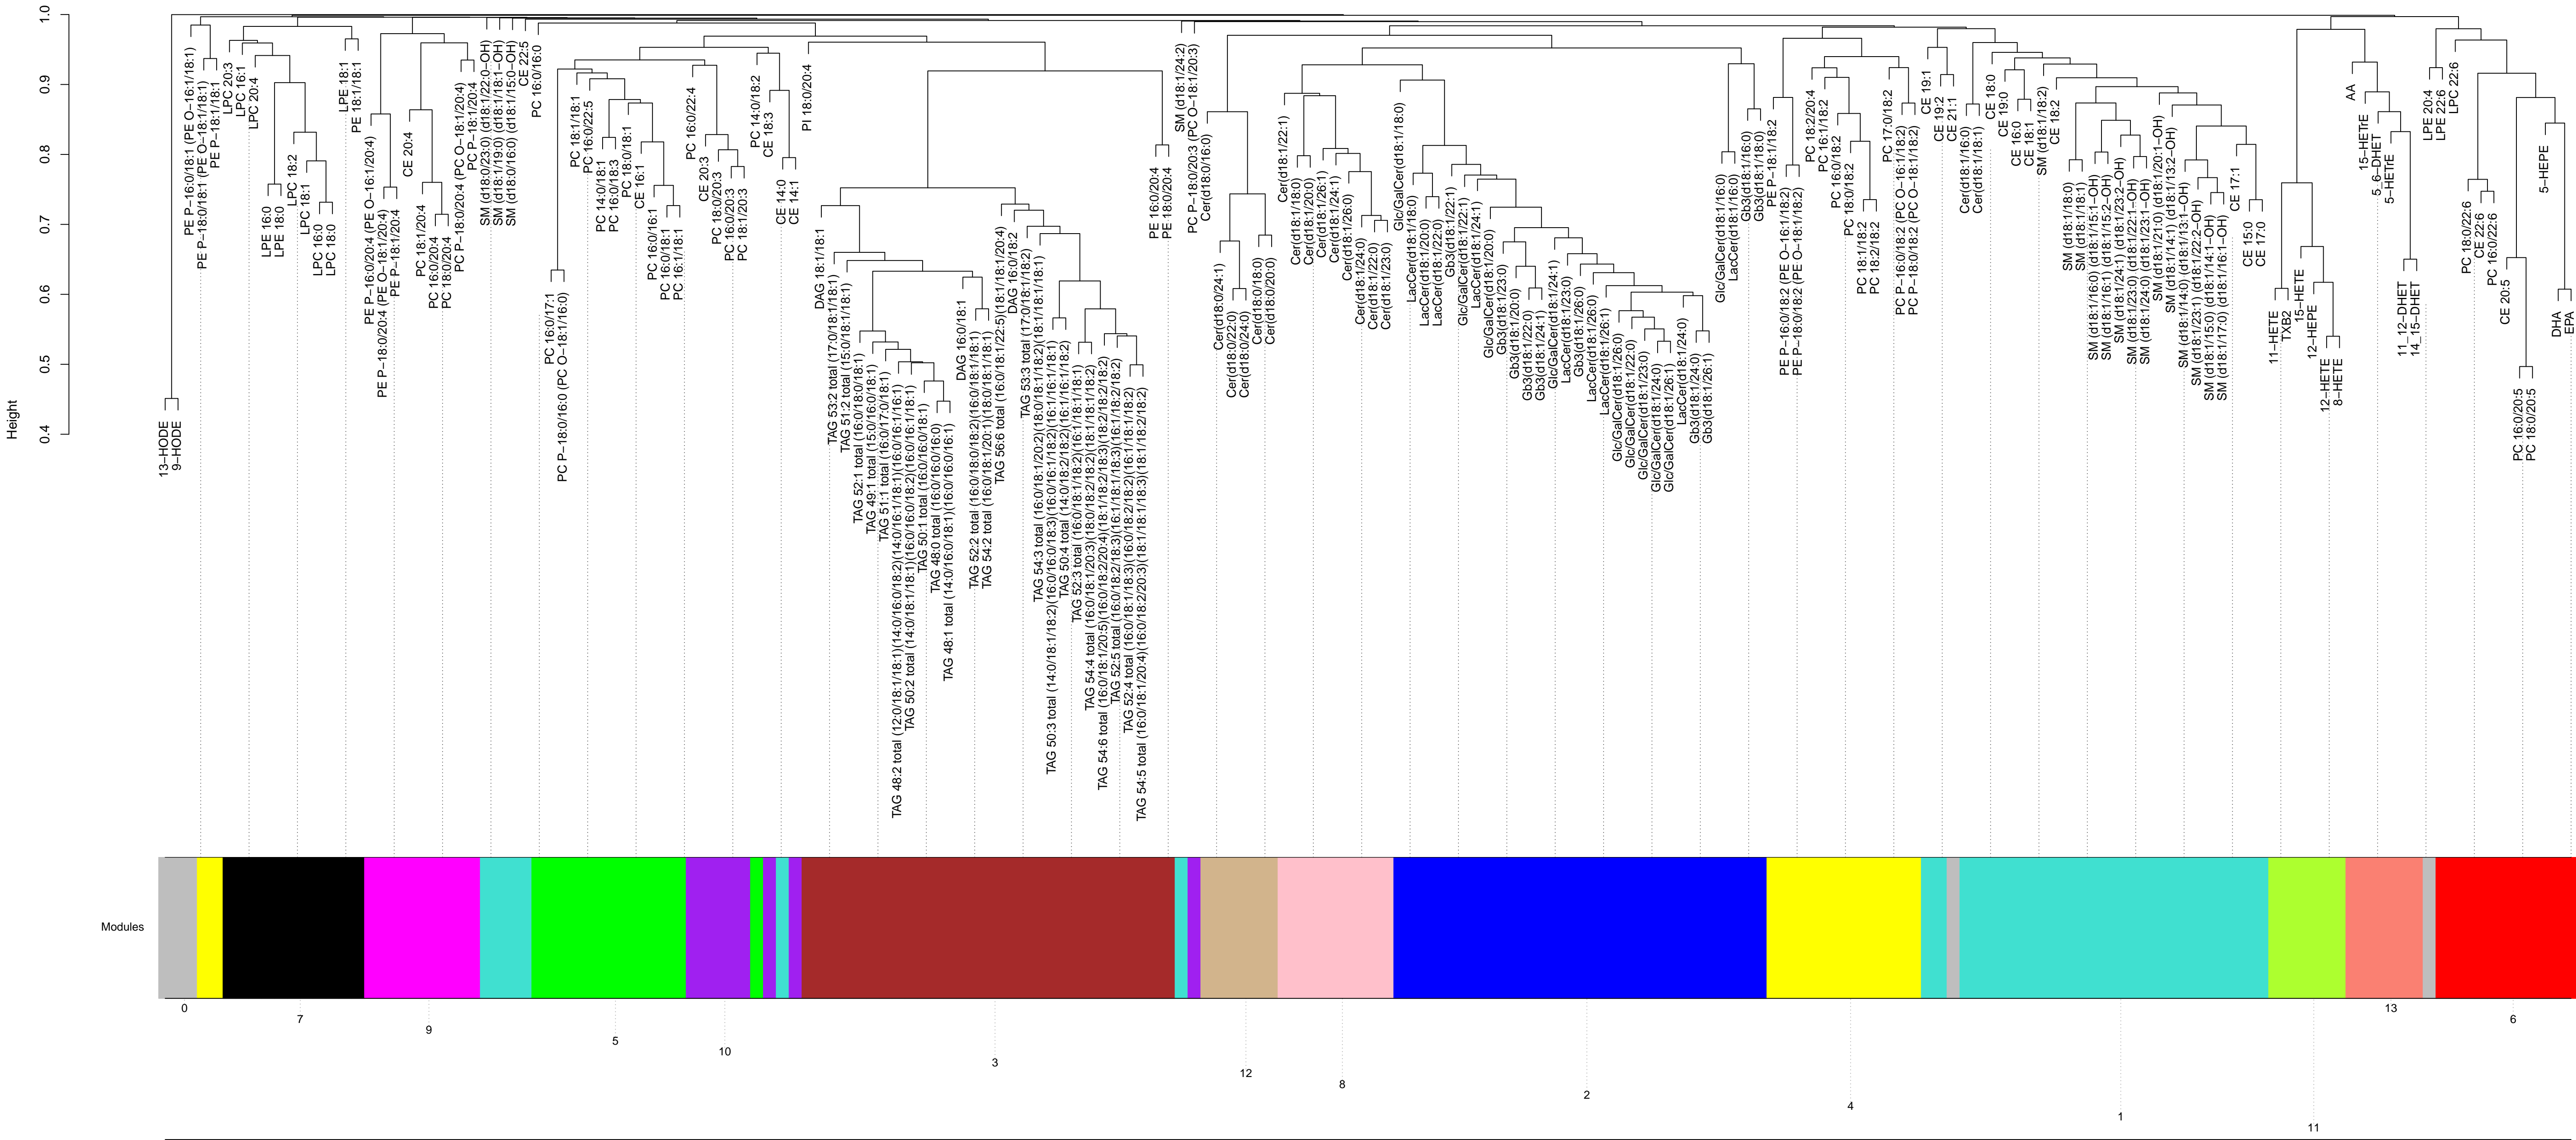

Supplement: s1 [file s1]
